# Supplementary material for: Differential Response of the Cynomolgus Macaque Gut Microbiota to Shigella Infection
Source: PLoS One. 2013 Jun 5;8(6):e64212. doi: 10.1371/journal.pone.0064212 (PMC3673915; doi:10.1371/journal.pone.0064212)
Supplement: Dataset S1 — Metadata and sequence information for cynomolgus macaques within live-attenuated S. dysenteriae 1 study groups (1–4): sample metadata and community composition (percentage of Greengenes database assignments) for each sample (n = 374). (XLS) [file pone.0064212.s009.xls]

## Sheet: Sheet1
Table S1. Metadata and sequence information for cynomolgus macaques within live-attenuated S. dysentariae study groups (1-4): sample metadata and community composition (percentage of Greengenes database assignments) for each sample (n=374c).
Sample ID	Monkey name	Day	Treatment group	Study	Immunization administered	Origin	Community type	Total number reads per sampleb	Lactobacillus	Streptococcus	Prevotella	Clostridium clade 1	otu 2159 (Ruminococcaceae family)	Enterococcus	otu 2087 (Lachnospiraceae family)	Treponema	Oscillospira	Bulleidia	Sarcina	Ruminococcus clade 1	Incertae sedis family Erysipelotrichaceae	Coprococcus	Leuconostoc	Blautia	Dialister	otu 1998 (Catabacteriaceae family)	Weissella	Butyrivibrio	p-75-a5	otu 4381 (F16 family)	Comamonas	Flavobacterium	Incertae sedis family Lachnospiraceae	Yersinia	Ruminococcus clade 2	Eubacterium clade 1	Aerococcus	Pedobacter	Faecalibacterium	Peptococcus	Lactococcus	Pseudomonas	Adlercreutzia	Catenibacterium	otu 2066 (Clostridiales family XIII)	otu 2201 (Veillonellaceae family)	Parabacteroides	Dysgonomonas	Sphingobacterium
1_0	1	0	Vaccinated	1	CVD1256	Philippines	I	7341	0.3045	0.014	0.0654	0.009	0.0526	0.0003	0.0217	0.0031	0.0319	0.0031	0.0038	0.026	0.0008	0.003	0.0007	0.0052	0	0.0041	0.0001	0.0015	0.0029	0	0.0223	0	0.0034	0	0.0016	0.0044	0	0	0.001	0.0003	0.0005	0.0138	0.0003	0	0.0001	0.0005	0.0046	0	0
1_1	1	1	Vaccinated	1	CVD1256	Philippines	III	6093	0.8387	0.0292	0.0348	0.0023	0.0084	0	0.0003	0	0.0018	0.013	0	0.0005	0.0048	0.001	0	0.001	0.0007	0	0.0002	0.003	0.0033	0.0025	0	0	0.0013	0	0.0013	0	0	0	0.0007	0.0002	0.0002	0	0.0011	0.0011	0.0007	0	0.0005	0	0
1_2	1	2	Vaccinated	1	CVD1256	Philippines	III	5861	0.8441	0.0746	0.0101	0.0039	0.0075	0	0.0007	0	0.002	0.0084	0	0.0007	0.0044	0.0009	0.0007	0.0007	0.0002	0.0027	0.0003	0.0038	0.0029	0.0017	0	0	0.0002	0	0.0002	0	0	0	0.0002	0.0002	0	0	0.0002	0.001	0	0	0.0002	0	0
1_7	1	7	Vaccinated	1	CVD1256	Philippines	I	5807	0.3492	0.3258	0.0248	0.0072	0.0515	0	0.0033	0.001	0.0119	0.0074	0.0003	0.0062	0.0041	0.0079	0.0007	0.0107	0.005	0.0062	0.0002	0.0009	0.0015	0.0024	0.0002	0	0.0036	0	0.0029	0.0024	0	0	0.0019	0.0034	0.001	0	0.0003	0	0.0002	0.0033	0.0021	0	0
1_14	1	14	Vaccinated	1	CVD1256	Philippines	I	5797	0.1497	0.0174	0.0493	0.004	0.07	0.0002	0.0138	0.0041	0.0497	0.0028	0.0036	0.0166	0.0005	0.0019	0.0003	0.0012	0.0164	0.0423	0	0.0017	0.0047	0.0005	0	0	0.0029	0	0.0005	0.0109	0	0	0.0022	0	0	0	0	0	0	0.0007	0.001	0	0
1_28	1	28	Vaccinated	1	CVD1256	Philippines	III	8008	0.8343	0.1005	0.0142	0.0011	0.0011	0.0001	0.0002	0	0.0004	0.0079	0.0037	0.0004	0.0064	0.0002	0.0017	0.006	0	0	0.0035	0	0.0012	0	0	0	0	0	0.0001	0	0	0	0	0	0	0.0002	0.0001	0.0004	0.0007	0.0002	0.0001	0	0.0001
1_29	1	29	Vaccinated	1	CVD1256	Philippines	III	4988	0.7432	0.1474	0.0044	0.0104	0.0004	0.0006	0	0.0002	0.0004	0.0138	0.0088	0.0008	0.003	0.0178	0.0002	0.0034	0	0	0.0006	0.0016	0.0006	0	0	0	0	0	0	0	0	0	0.0002	0	0.0012	0	0.0014	0.0018	0.003	0.0004	0	0	0
1_30	1	30	Vaccinated	1	CVD1256	Philippines	III	7755	0.7591	0.0009	0.0017	0.0316	0.0049	0.0001	0.0021	0.0005	0.0049	0.0023	0.0502	0.0317	0.0026	0.0036	0.0015	0.0019	0	0.0009	0	0	0.0008	0	0	0	0.0001	0	0	0.0001	0	0	0	0	0	0.0014	0.0004	0.0001	0.0062	0	0	0	0
1_31	1	31	Vaccinated	1	CVD1256	Philippines	III	7486	0.6619	0.0015	0.0019	0.1497	0.0044	0.0001	0.0031	0.0007	0.0048	0.0017	0.0438	0.0196	0	0.0008	0	0.0008	0	0.0039	0	0.0003	0.0005	0	0	0	0.0004	0	0	0.0003	0	0	0	0	0	0.0016	0.0001	0	0.0029	0.0001	0	0	0
1_32	1	32	Vaccinated	1	CVD1256	Philippines	III	8691	0.7001	0.0163	0.0009	0.1148	0.0033	0.0018	0.0002	0.0002	0.0008	0.0016	0.0601	0.001	0.0009	0.0007	0.0005	0.0007	0	0.0047	0.0016	0.0005	0.0003	0	0	0	0.0001	0	0	0.0026	0	0	0	0	0.001	0.0001	0.0001	0.0001	0.0007	0	0	0	0
1_35	1	35	Vaccinated	1	CVD1256	Philippines	III	11558	0.6024	0.0021	0.0008	0.0952	0.0029	0	0.0018	0	0.001	0.0027	0.1166	0.0042	0.0001	0.0441	0.0002	0.0016	0	0.0017	0.0001	0	0.0007	0	0	0	0	0	0	0.0002	0	0	0	0	0	0.0007	0.0007	0.0002	0.0138	0.0002	0.0001	0	0
1_56	1	56	Vaccinated	1	CVD1256	Philippines	IV	9055	0.0086	0.0025	0.0198	0.1548	0.03	0.0031	0.0113	0.0301	0.0077	0.0017	0.0912	0.0644	0.0001	0.0017	0.1168	0.0023	0	0.0472	0.0001	0.0006	0.001	0	0	0	0.0009	0	0	0.0022	0	0	0	0	0.0011	0	0.0021	0.0012	0.0047	0.002	0.0018	0	0
1_57	1	57	Vaccinated	1	CVD1256	Philippines	I	5506	0.0823	0.263	0.2681	0.0403	0.018	0.0007	0.0116	0.0091	0.0065	0.0162	0.0147	0.0211	0.0214	0.0007	0.016	0.0045	0	0.0174	0.0005	0.0005	0.0015	0	0	0	0.0005	0	0.0004	0.0082	0	0	0.0004	0	0	0	0.0011	0.0194	0.0009	0.002	0.0036	0	0
1_58	1	58	Vaccinated	1	CVD1256	Philippines	I	5828	0.2466	0.0863	0.0084	0.0029	0.0208	0.0045	0.0053	0.0256	0.011	0.0046	0.0003	0.0024	0.0012	0.0002	0.001	0.0015	0	0.0062	0	0.0009	0.0019	0	0.1891	0.0009	0.0003	0.0384	0.0019	0.0014	0.001	0	0.0019	0	0.0033	0.0002	0.0009	0.0033	0.0002	0.0017	0.0009	0.0034	0.0043
1_59	1	59	Vaccinated	1	CVD1256	Philippines	III	5591	0.9095	0.0132	0.0032	0.0086	0.0013	0.0021	0.0039	0.0073	0	0.0005	0.024	0.0002	0	0	0	0	0	0.0002	0	0	0.0002	0.0005	0	0	0	0	0	0	0	0	0.0004	0	0	0	0.0002	0	0.0002	0	0	0	0
1_60	1	60	Vaccinated	1	CVD1256	Philippines	IV	6809	0.145	0.0044	0.0305	0.3106	0.0068	0.0113	0.0004	0.0248	0.0187	0.0018	0.004	0.0007	0.0057	0.0001	0.0759	0	0.0001	0.0044	0	0.0001	0.0607	0	0	0	0	0	0	0.0009	0	0	0.0001	0	0.0038	0	0.0235	0	0.0065	0.0026	0.0094	0.0003	0
1_63	1	63	Vaccinated	1	CVD1256	Philippines	II	7995	0.0046	0.0238	0.0281	0.0848	0.0281	0.0206	0.0104	0.0409	0.0074	0.018	0.0015	0.0016	0.0139	0.0001	0.0298	0.0039	0	0.0488	0.0001	0.0231	0.0709	0.0026	0	0	0.0001	0	0.0005	0.0005	0	0	0	0	0.0011	0	0.06	0.0006	0.0023	0.0001	0.0026	0	0
1_70	1	70	Vaccinated	1	CVD1256	Philippines	IV	6488	0.0331	0.0048	0.1581	0.1059	0.0096	0.3329	0.006	0.02	0.0012	0.0281	0.0009	0.0028	0.0145	0.0285	0.0006	0.0092	0	0.0011	0.0032	0.0046	0.0025	0.0011	0	0	0.0006	0	0.0002	0.0009	0	0	0.0009	0	0	0	0.0083	0.0011	0.002	0.0006	0.0015	0	0
2_0	2	0	Vaccinated	1	CVD1256	Admixed (Philippines, Indonesia)	I	5915	0.234	0.1586	0.0649	0.001	0.0456	0	0.0113	0.0156	0.0404	0.0049	0.0005	0.0286	0.003	0.0024	0.002	0.0044	0.0022	0.0108	0	0.0005	0.0272	0.0002	0	0	0.0019	0	0.0015	0.0039	0	0	0.0029	0.001	0.0017	0	0.0008	0	0.0017	0.0005	0.0032	0	0
2_1	2	1	Vaccinated	1	CVD1256	Admixed (Philippines, Indonesia)	III	4550	0.696	0.071	0.0242	0.0002	0.0202	0	0.0024	0.0015	0.0112	0.0112	0	0.0024	0.0073	0.0029	0.0004	0.0031	0.004	0.0007	0	0.002	0.0105	0.0007	0	0	0.0026	0	0.002	0.0112	0	0	0.0048	0.0009	0	0	0.0007	0	0.0033	0.0009	0.0002	0	0
2_2	2	2	Vaccinated	1	CVD1256	Admixed (Philippines, Indonesia)	I	4802	0.1968	0.3486	0.0158	0.0002	0.0548	0	0.0146	0.0065	0.0995	0.0035	0	0.0071	0.0006	0.0071	0.0002	0.01	0.0012	0.0015	0.0002	0.0044	0.0127	0.0004	0	0	0.0056	0	0.0052	0.0281	0	0	0.0021	0.0004	0	0	0.0021	0	0.0006	0.001	0.0025	0	0
2_7	2	7	Vaccinated	1	CVD1256	Admixed (Philippines, Indonesia)	I	4916	0.4544	0.1546	0.0366	0.0014	0.0299	0	0.0041	0.0106	0.0205	0.0075	0	0.0035	0.0136	0.0098	0.0008	0.0067	0.0083	0.001	0	0.0026	0.0092	0.0002	0	0	0.0022	0	0.002	0.0039	0	0	0.0053	0.0012	0	0	0.0002	0	0.0002	0.002	0.0031	0	0
2_14	2	14	Vaccinated	1	CVD1256	Admixed (Philippines, Indonesia)	I	4837	0.4929	0.1472	0.0465	0.0008	0.019	0	0.0434	0.0424	0.0143	0.0048	0	0.0025	0.0041	0.0062	0.0004	0.0058	0.0014	0.0008	0	0.0008	0.0145	0.0027	0	0	0.0033	0	0.005	0.0019	0	0	0.001	0.0002	0	0	0.0004	0.0004	0	0	0.0017	0	0
2_28	2	28	Vaccinated	1	CVD1256	Admixed (Philippines, Indonesia)	III	8365	0.7819	0.0105	0.0059	0.0868	0.0017	0.0004	0.0007	0.0002	0	0.0006	0.0286	0.0006	0.0002	0.0019	0.0032	0	0	0.0001	0.0302	0.0001	0.0001	0	0	0	0	0	0	0	0	0	0	0	0.0004	0.002	0	0	0.0121	0	0	0	0
2_29	2	29	Vaccinated	1	CVD1256	Admixed (Philippines, Indonesia)	III	6148	0.8305	0.0708	0.0039	0.0516	0.0005	0.0002	0.0011	0	0.0002	0.0026	0.0076	0.0002	0.0002	0.0021	0.0011	0.0007	0	0	0.0018	0	0	0	0	0	0	0	0	0	0	0	0	0	0	0	0	0.0011	0.0033	0	0	0	0
2_30	2	30	Vaccinated	1	CVD1256	Admixed (Philippines, Indonesia)	III	7409	0.8664	0.0514	0.0051	0.0111	0.0024	0.0003	0.0001	0.0034	0.0009	0.0047	0.0008	0.0003	0.0003	0.0007	0.0161	0.0005	0	0.0001	0.0001	0.0001	0.0074	0.0001	0	0	0	0	0	0	0	0	0	0	0.0009	0	0.0001	0	0.0001	0.0005	0	0	0
2_31	2	31	Vaccinated	1	CVD1256	Admixed (Philippines, Indonesia)	III	8248	0.7644	0.1809	0.0006	0.0249	0	0.0005	0.0002	0.0005	0.0002	0.0012	0.0048	0.0001	0.001	0.0008	0.0001	0	0	0	0	0	0.0008	0	0	0	0	0	0	0	0	0	0.0001	0	0	0.0005	0.0002	0	0.0029	0	0	0	0
2_32	2	32	Vaccinated	1	CVD1256	Admixed (Philippines, Indonesia)	I	10538	0.4537	0.2507	0.0101	0.0407	0.0028	0.0019	0.0004	0.0001	0.0018	0.0058	0.0032	0.0001	0.0747	0.0022	0.0001	0.0496	0	0.0004	0.0006	0.0001	0.0124	0	0	0	0.0009	0	0.0003	0.0002	0	0	0.0001	0	0.0001	0.0011	0.0027	0.0022	0.001	0.001	0.0008	0	0
2_35	2	35	Vaccinated	1	CVD1256	Admixed (Philippines, Indonesia)	I	11365	0.4524	0.2722	0.0025	0.0224	0.0053	0.0006	0.0023	0.004	0.0048	0.0059	0.0036	0.0014	0.0294	0.0007	0	0.0136	0	0.0004	0.0029	0.0006	0.0738	0.0004	0	0	0.0014	0	0.001	0.0028	0	0	0	0.0003	0.0002	0	0.0015	0.0015	0.002	0.0001	0.0004	0	0
2_56	2	56	Vaccinated	1	CVD1256	Admixed (Philippines, Indonesia)	III	6596	0.7015	0.0757	0.0256	0.0992	0.0055	0.0003	0.003	0.0085	0.0014	0.0056	0.0085	0.0036	0	0.0006	0.0023	0.0014	0.0003	0.0002	0.0039	0.0002	0.0033	0.0002	0	0	0.0005	0	0.0003	0.0006	0	0	0	0	0	0	0.0015	0.0003	0.0012	0	0.0002	0	0
2_57	2	57	Vaccinated	1	CVD1256	Admixed (Philippines, Indonesia)	III	7932	0.7824	0.0905	0.0267	0.0058	0.0018	0.0004	0.0008	0.0057	0.0001	0.0032	0.0004	0.0003	0.0004	0.0037	0.0113	0.0039	0.0001	0.0004	0.0066	0.0001	0.01	0.0003	0	0	0.0001	0	0	0.0003	0	0	0.0006	0.0001	0.0008	0	0.0001	0.002	0.0035	0	0.0005	0	0
2_58	2	58	Vaccinated	1	CVD1256	Admixed (Philippines, Indonesia)	IV	6832	0.119	0.0291	0.0429	0.0009	0.0026	0.06	0.0012	0.0102	0.0015	0.0023	0	0.0001	0.0012	0.0006	0.001	0	0.0003	0.0001	0	0.0034	0.007	0.0001	0.0468	0	0	0.4599	0	0	0	0	0.0001	0	0.0124	0.0004	0.0019	0	0.0003	0.0001	0.0004	0.0767	0.0003
2_59	2	59	Vaccinated	1	CVD1256	Admixed (Philippines, Indonesia)	I	5128	0.1892	0.1416	0.0047	0.0014	0	0.0113	0.0002	0.0027	0.0004	0.0012	0	0	0.0004	0	0.0499	0	0	0	0.0002	0.0008	0.0037	0.0002	0.2482	0	0	0.0704	0	0	0.0012	0	0	0	0.0144	0.0012	0.0023	0.0004	0	0.0004	0	0.032	0.07
2_60	2	60	Vaccinated	1	CVD1256	Admixed (Philippines, Indonesia)	IV	7759	0.1179	0.0129	0.1123	0.0102	0.022	0.0259	0	0.0907	0.0106	0.0034	0.0035	0.0019	0.0043	0.0005	0.0419	0.0004	0.0006	0	0.0003	0.003	0.2516	0.0244	0.0009	0	0	0	0.0004	0.0003	0	0	0.0004	0.0013	0.0064	0.0003	0.0021	0	0.0018	0.0008	0.0005	0	0
2_63	2	63	Vaccinated	1	CVD1256	Admixed (Philippines, Indonesia)	III	8600	0.4697	0.1014	0.0419	0.1041	0.0103	0.0005	0.0042	0.0471	0.0016	0.0016	0.0015	0.0023	0.002	0.001	0.0002	0.0012	0.0002	0.0005	0.0155	0.0001	0.0621	0.0009	0	0	0.0005	0	0	0.0012	0	0	0.0016	0.0072	0	0	0.0003	0.0009	0.0034	0.0005	0.0005	0	0
2_70	2	70	Vaccinated	1	CVD1256	Admixed (Philippines, Indonesia)	I	8717	0.0675	0.3779	0.1627	0.0458	0.0031	0.0011	0.0036	0.0505	0.0003	0.0352	0.0014	0.0007	0.0056	0.0006	0.0001	0.0088	0.0001	0.0006	0.0551	0.0017	0.0196	0.0017	0	0	0.0005	0	0	0	0	0	0.0001	0.0007	0	0	0.0052	0.0018	0.0017	0.0003	0.0093	0	0
2_84	2	84	Vaccinated	1	CVD1256	Admixed (Philippines, Indonesia)	III	5970	0.4693	0.1482	0.0608	0.0727	0.0027	0.0003	0.0007	0.0022	0.0015	0.0141	0.0002	0.0003	0.0013	0.0647	0	0.0015	0	0	0.0052	0	0	0.0005	0	0	0.0005	0	0.0002	0	0	0	0.0007	0	0	0	0.0101	0.0002	0.0109	0	0.0005	0	0
3_0	3	0	Vaccinated	1	CVD1256	Philippines	I	5049	0.2349	0.1549	0.0408	0.0073	0.0592	0.0004	0.0067	0.0111	0.0234	0.0065	0.0018	0.0184	0.0006	0.0026	0.0012	0.0077	0	0.0061	0.0012	0.0014	0.0006	0.0004	0	0	0.0051	0	0.0006	0.0069	0	0	0.002	0.0018	0.0022	0	0.0002	0	0.0006	0.0008	0.001	0	0
3_1	3	1	Vaccinated	1	CVD1256	Philippines	I	4561	0.5341	0.2848	0.0344	0.0011	0.0145	0	0.0026	0.0004	0.0039	0.0107	0	0.0009	0.005	0.0024	0.0002	0.0042	0.0029	0	0	0.0013	0.0007	0.0007	0	0	0.0013	0	0.0013	0	0	0	0.0026	0.002	0	0	0.0002	0	0.0007	0	0.0026	0	0
3_2	3	2	Vaccinated	1	CVD1256	Philippines	I	5574	0.5606	0.2705	0.0701	0.0018	0.0079	0	0.0007	0	0.0041	0.0095	0.0005	0.0011	0.002	0.0016	0.0032	0.0034	0.0014	0	0	0.0014	0.0009	0.0002	0	0	0.0002	0	0.0014	0	0	0	0.0014	0.0004	0	0	0.0005	0	0.0002	0	0.002	0	0
3_7	3	7	Vaccinated	1	CVD1256	Philippines	I	5157	0.548	0.173	0.0138	0.0016	0.0268	0	0.0087	0.0091	0.0142	0.0083	0.0002	0.0091	0.0019	0.0014	0.0002	0.0056	0.0019	0.0031	0	0.0031	0.0016	0.0012	0	0	0.0037	0	0.0008	0.0004	0	0	0.001	0	0	0	0.0004	0	0	0	0.0008	0	0
3_14	3	14	Vaccinated	1	CVD1256	Philippines	I	4851	0.2169	0.3214	0.1142	0.0039	0.0458	0.0002	0.0054	0.0254	0.0219	0.0124	0.0012	0.0016	0.0043	0.001	0.0012	0.007	0.0035	0.0041	0	0.0076	0.0014	0.0091	0	0	0.0027	0	0.0019	0.0047	0	0	0.0012	0.001	0	0	0.001	0.0016	0	0.0008	0.0037	0	0
3_28	3	28	Vaccinated	1	CVD1256	Philippines	III	9195	0.625	0.1013	0.0007	0.1901	0.0013	0.003	0.0009	0.0002	0.0001	0.0007	0.0285	0.001	0	0.0001	0.0007	0.0008	0	0.0003	0.002	0	0	0	0	0	0	0	0	0.0001	0	0	0	0	0.0001	0.0003	0.0001	0	0.0008	0	0	0	0
3_29	3	29	Vaccinated	1	CVD1256	Philippines	III	7284	0.5581	0.2412	0.0007	0.1071	0.0005	0.0005	0.0001	0	0.0001	0.0066	0.022	0.0012	0.0001	0.0008	0.0003	0.001	0	0.0027	0.0003	0.0003	0.0005	0	0	0	0	0	0	0	0	0	0	0	0	0.0003	0.0004	0	0.0008	0	0	0	0
3_30	3	30	Vaccinated	1	CVD1256	Philippines	III	7877	0.8581	0.103	0.0006	0.0074	0.0009	0.0011	0.0001	0	0.0005	0.0034	0.0072	0.0003	0.0014	0.0008	0.0025	0.0014	0	0.0001	0	0	0.0001	0	0	0	0	0	0.0001	0	0	0	0	0	0.0006	0	0.0003	0.001	0.0003	0	0	0	0
3_31	3	31	Vaccinated	1	CVD1256	Philippines	III	7816	0.808	0.0019	0.0029	0.0068	0.0152	0.0496	0.0018	0.0013	0.0171	0.0051	0	0.0024	0.0009	0.0004	0.0003	0.0014	0	0.0014	0	0.0005	0.0023	0	0	0	0.0003	0	0	0.0017	0	0	0	0	0.0003	0.0001	0.0001	0	0.0004	0.0003	0.0003	0	0
3_32	3	32	Vaccinated	1	CVD1256	Philippines	III	8873	0.719	0.0418	0.0044	0.0113	0.0287	0.0242	0.0027	0.001	0.0095	0.0055	0.0014	0.0015	0.0018	0.0005	0	0.0063	0	0.0016	0.0017	0.0011	0.0027	0	0	0	0.0005	0	0.0001	0.0011	0.0115	0	0.0002	0	0.0001	0.0006	0.0005	0.0026	0.0003	0.0008	0	0	0
3_35	3	35	Vaccinated	1	CVD1256	Philippines	III	10311	0.6548	0.0042	0.001	0.0683	0.0021	0.1186	0.0023	0.0006	0.0013	0.0016	0.0382	0.005	0	0.0011	0.0003	0.001	0.0001	0.0064	0.0053	0.0006	0.0012	0	0	0	0.0005	0	0.0001	0.0003	0.0007	0	0	0	0.0013	0.0016	0.0005	0.0003	0.0062	0	0	0	0
3_56	3	56	Vaccinated	1	CVD1256	Philippines	III	8165	0.493	0.0318	0.0203	0.0856	0.0148	0.0131	0.0031	0.074	0.0038	0.0026	0.0077	0.0031	0.0006	0.0006	0.0006	0.0006	0	0.0055	0.0002	0.0002	0.0006	0	0	0	0.0004	0	0	0.0042	0	0	0	0	0.0022	0	0.0023	0	0.002	0.0006	0.0061	0	0
3_57	3	57	Vaccinated	1	CVD1256	Philippines	III	7519	0.4205	0.1366	0.0028	0.2745	0.0021	0.0013	0.009	0.0169	0.002	0.0035	0.0085	0.0016	0.0023	0.0007	0.0378	0.0003	0	0.002	0.0015	0	0	0	0	0	0.0003	0	0	0.0011	0	0	0	0	0.0004	0	0.0016	0	0.0017	0	0.0005	0	0
3_58	3	58	Vaccinated	1	CVD1256	Philippines	III	7517	0.5436	0.0112	0.0028	0.0032	0.0293	0.0007	0.0021	0.0772	0.0198	0.0047	0.0007	0.002	0.0015	0.0005	0.0037	0.002	0	0.0313	0.0005	0.0017	0.0016	0	0	0	0.0009	0	0.0004	0.0088	0.0003	0	0	0	0.0025	0	0.0017	0.0003	0.0001	0.0011	0.0004	0	0
3_59	3	59	Vaccinated	1	CVD1256	Philippines	II	7845	0.1036	0.0082	0.2697	0.0505	0.0218	0.0005	0.0027	0.0603	0.0061	0.0013	0.0013	0.0667	0.0018	0.0011	0.0001	0.0005	0.0119	0.013	0	0.0006	0.0868	0.0075	0.0009	0.0001	0.0001	0	0	0.0006	0	0	0.0186	0.006	0	0.0001	0.0005	0.0001	0.001	0.001	0.0009	0	0
3_60	3	60	Vaccinated	1	CVD1256	Philippines	III	6905	0.6132	0.012	0.0384	0.1188	0.008	0.0072	0.0007	0.0062	0.0061	0.008	0.0062	0.0003	0.0117	0.0007	0.0737	0.0004	0.0003	0.001	0.0009	0.0001	0.003	0	0.0022	0	0.0007	0	0	0.0007	0	0	0.0003	0	0.0113	0.0077	0.0019	0.0001	0.0016	0	0.0006	0.0001	0.0006
3_84	3	84	Vaccinated	1	CVD1256	Philippines	III	7427	0.4455	0.1116	0.017	0.1929	0.0012	0	0.0004	0.0042	0.0001	0.0044	0.0494	0.0001	0.0004	0.0019	0.0024	0.0011	0	0.0004	0.0007	0.0008	0.0008	0	0	0	0.0003	0	0	0.0004	0	0	0.0001	0	0	0	0.002	0	0.0023	0.0001	0.0008	0	0
4_0	4	0	Vaccinated	1	CVD1256	Philippines	I	3943	0.5247	0.0672	0.0855	0.001	0.0416	0	0.0104	0.0076	0.0261	0.0033	0.0003	0.0256	0.0013	0.002	0.001	0.0068	0.0066	0.0084	0	0.0015	0.0015	0.0023	0.0003	0	0.0043	0	0.003	0.0028	0.0005	0	0.0005	0.0015	0.0013	0	0	0.0003	0	0.002	0.0018	0	0
4_1	4	1	Vaccinated	1	CVD1256	Philippines	I	3422	0.4962	0.0257	0.0514	0.0056	0.0517	0	0.0275	0.0076	0.0123	0.0362	0.0015	0.0041	0.0216	0.0012	0	0.0152	0.0053	0.0015	0.0015	0.0169	0.0263	0.012	0	0	0.0056	0	0.0047	0.0009	0	0	0.0067	0.0018	0	0	0.0026	0.0155	0	0.0003	0.0009	0	0
4_2	4	2	Vaccinated	1	CVD1256	Philippines	I	5723	0.1456	0.1532	0.148	0.0409	0.0634	0	0.0346	0.0619	0.015	0.0229	0.001	0.0197	0.0197	0.0016	0.0003	0.0094	0.008	0.0005	0.0019	0.0082	0.0136	0.01	0	0	0.0068	0	0.0068	0.0007	0	0	0.0045	0.0014	0.0002	0	0.0007	0.0311	0.0007	0.0005	0.0002	0	0
4_7	4	7	Vaccinated	1	CVD1256	Philippines	I	4709	0.299	0.0533	0.0575	0.0032	0.0491	0	0.1338	0.0045	0.0244	0.0149	0.0025	0.0302	0.0087	0.0019	0.0025	0.0064	0.0106	0.0015	0.0002	0.0051	0.0015	0.0004	0	0	0.0028	0	0.0051	0	0	0	0.0023	0.0025	0	0	0.0019	0.0023	0.0002	0.0002	0	0	0
4_14	4	14	Vaccinated	1	CVD1256	Philippines	I	3272	0.4948	0.0333	0.1693	0.0028	0.0403	0	0.0153	0.0028	0.0183	0.0211	0.0028	0.0028	0.0144	0.0049	0.0003	0.0122	0.0058	0.0009	0.0006	0.007	0.0012	0.0018	0	0	0.0083	0	0.0058	0	0	0	0.0015	0.0021	0	0	0	0.0021	0.0003	0.0012	0	0	0
4_28	4	28	Vaccinated	1	CVD1256	Philippines	III	7157	0.4174	0.2713	0.0198	0.0489	0.0007	0.0001	0.0088	0.0098	0	0.0006	0.1332	0.0035	0.0001	0.0001	0.0205	0.0006	0	0	0.0003	0.0001	0.0003	0.0007	0	0	0	0	0.0001	0	0	0	0	0	0.0031	0.002	0.0006	0	0.0014	0	0.0001	0	0
4_29	4	29	Vaccinated	1	CVD1256	Philippines	III	5988	0.934	0.0017	0.0038	0.0145	0.001	0.0002	0.0015	0.0003	0.0002	0	0.0172	0.0022	0	0.0003	0	0.0003	0	0	0.0003	0	0	0	0	0	0	0	0	0.0003	0	0	0.0003	0	0	0.0003	0	0	0.001	0	0	0	0
4_30	4	30	Vaccinated	1	CVD1256	Philippines	III	5414	0.7453	0.0118	0.0068	0.0379	0.0028	0.0039	0.01	0.0078	0.0046	0.0024	0.0342	0.0127	0.0031	0.0013	0.0015	0.0018	0	0.0026	0.0002	0	0	0	0	0	0	0	0	0.0009	0	0	0.0002	0.0002	0.0022	0.0015	0.0002	0	0.0035	0	0	0	0
4_31	4	31	Vaccinated	1	CVD1256	Philippines	III	7379	0.5932	0.3091	0.0005	0.0327	0.0005	0.0008	0	0.0003	0	0.0004	0.0352	0.0007	0.0004	0.0005	0	0.0001	0	0	0.0026	0	0	0	0	0	0	0	0	0	0	0	0.0007	0	0	0.0012	0	0	0.0039	0	0	0	0
4_32	4	32	Vaccinated	1	CVD1256	Philippines	III	7302	0.8881	0.0044	0.0037	0.0267	0.0018	0.0004	0.0011	0.0071	0	0.0001	0.013	0.0012	0	0.0001	0.003	0.0004	0	0.0005	0.0033	0	0.0001	0.0001	0	0	0.0003	0	0	0	0	0	0	0.0001	0.0004	0.0004	0	0	0.0018	0	0	0	0
4_35	4	35	Vaccinated	1	CVD1256	Philippines	I	10579	0.237	0.1522	0.0831	0.0251	0.0207	0.0003	0.0301	0.0371	0.0034	0.01	0.0083	0.0019	0.0077	0.0026	0.0006	0.0045	0.0001	0.0351	0.001	0.0053	0.0069	0.0074	0	0	0.0006	0	0	0.0003	0	0	0.0003	0.0001	0.0003	0.0009	0.0038	0	0.0078	0	0.0004	0	0
4_56	4	56	Vaccinated	1	CVD1256	Philippines	III	6648	0.5104	0.0141	0.0417	0.1804	0.0036	0.0199	0.0059	0.022	0.0012	0.0045	0.056	0.0036	0	0.0012	0.0015	0.0003	0	0.0038	0.0008	0.0011	0.0008	0.0003	0	0	0.0008	0	0	0	0	0	0	0	0	0	0.0029	0	0.0014	0	0	0	0
4_57	4	57	Vaccinated	1	CVD1256	Philippines	III	6904	0.7197	0.0944	0.0025	0.0558	0.0004	0.003	0.0058	0.0164	0.0001	0.0006	0.02	0.0184	0.0001	0.0006	0.0016	0.0001	0	0	0.0001	0	0.0001	0.0007	0	0	0.0001	0	0.0004	0.0001	0	0	0	0.0001	0.0003	0	0.0006	0	0.0127	0	0.0003	0	0
4_58	4	58	Vaccinated	1	CVD1256	Philippines	III	6224	0.8281	0.026	0.0082	0.0341	0.0005	0.0085	0.0071	0.0154	0.0002	0	0.0272	0	0.0008	0.0002	0.0027	0.0002	0	0.0003	0	0.0002	0.0005	0.0005	0	0	0	0	0	0	0	0	0.0008	0	0.0006	0	0.0005	0.0002	0.0011	0	0.0003	0	0
4_59	4	59	Vaccinated	1	CVD1256	Philippines	IV	7650	0.2541	0.0055	0.0012	0.0698	0.0047	0.1737	0.0008	0.0072	0.0021	0.0003	0.0029	0.0007	0	0	0.0342	0.0007	0.0004	0.0018	0.0001	0.0003	0.001	0	0.0001	0	0	0	0	0.0004	0	0	0	0	0.0077	0	0.0004	0	0	0.0013	0.0001	0.0003	0
4_60	4	60	Vaccinated	1	CVD1256	Philippines	I	6538	0.1569	0.1045	0.0912	0.0508	0.0052	0.0049	0.0073	0.2325	0.0015	0.0003	0.0203	0.0002	0.0005	0	0.0087	0.0002	0.0002	0.0014	0.0006	0.0009	0.0528	0.0038	0.0002	0	0.0002	0	0.0003	0.0002	0	0	0.0002	0.0005	0.0002	0.0002	0.0002	0	0.0037	0	0.0173	0	0
4_63	4	63	Vaccinated	1	CVD1256	Philippines	III	8115	0.3413	0.0336	0.0131	0.3872	0.0023	0.0154	0.0036	0.0211	0.0032	0.0001	0.0799	0.006	0.0018	0.0007	0.0059	0.0007	0.0001	0.0001	0.002	0	0.0001	0.0012	0	0	0	0	0.0001	0	0	0	0.0004	0.0005	0.0001	0	0.0015	0	0.0014	0.0001	0.0009	0.0001	0
4_70	4	70	Vaccinated	1	CVD1256	Philippines	IV	9076	0.1592	0.0677	0.0757	0.2643	0.0086	0.0041	0.0074	0.0631	0.004	0.0021	0.0597	0.0147	0.0042	0.0008	0.0003	0.0041	0.0007	0.0008	0.016	0.0001	0.0101	0.0024	0	0	0	0	0.0003	0.0002	0	0	0.0008	0.0066	0	0	0.0026	0.0002	0.0098	0.0003	0.0003	0	0
4_84	4	84	Vaccinated	1	CVD1256	Philippines	I	7358	0.1382	0.3171	0.0522	0.064	0.0073	0.0004	0.0096	0.0067	0.0107	0.0315	0.0553	0.002	0.0656	0.003	0.0083	0.0086	0	0.0043	0.0012	0.0022	0.001	0.0043	0	0	0.0011	0	0.0004	0.0016	0	0	0.001	0	0	0	0.0227	0.0023	0.0026	0	0	0	0
5_0	5	0	Vaccinated	1	CVD1255	Admixed (Indochina, Indonesia)	I	4159	0.5239	0.1904	0.0337	0.0026	0.0144	0	0.0046	0.0125	0.0065	0.0058	0.0026	0.0038	0.0026	0.0055	0.0022	0.0125	0.0002	0.0084	0.0031	0.0005	0.0002	0	0	0	0.0067	0	0.0072	0.0012	0.0007	0	0.0012	0.0007	0	0	0.0002	0	0.0019	0	0.0019	0	0
5_1	5	1	Vaccinated	1	CVD1255	Admixed (Indochina, Indonesia)	III	3570	0.9347	0	0.0076	0	0.0034	0.0003	0.0003	0	0	0.0109	0	0.0006	0.0031	0.0056	0	0.0045	0.0006	0.0003	0	0.0006	0	0	0	0	0.0003	0	0.002	0.0008	0	0	0.0031	0	0	0	0.0006	0.0008	0	0	0	0	0
5_2	5	2	Vaccinated	1	CVD1255	Admixed (Indochina, Indonesia)	III	2656	0.8773	0	0.0215	0	0.0079	0	0.0011	0	0.009	0.0072	0	0.0015	0.0056	0.0008	0.0004	0.0056	0.0011	0.0015	0	0.0015	0.0004	0	0	0	0	0	0.0015	0	0	0	0.0008	0.0015	0	0	0	0.0004	0.0015	0	0.0004	0	0
5_7	5	7	Vaccinated	1	CVD1255	Admixed (Indochina, Indonesia)	I	3673	0.3556	0.141	0.0675	0.0057	0.0487	0	0.0019	0.0046	0.0182	0.0221	0.0011	0.0095	0.0155	0.0063	0.0041	0.0218	0.0038	0.006	0	0.0025	0.0011	0	0	0	0.0049	0	0.0093	0.0035	0	0	0.0076	0.0005	0	0	0.0016	0	0.0011	0.0005	0.0005	0	0
5_14	5	14	Vaccinated	1	CVD1255	Admixed (Indochina, Indonesia)	I	4195	0.523	0.0095	0.0906	0.0043	0.0367	0.0002	0.0048	0.0029	0.0141	0.0236	0.0103	0.0055	0.0219	0.0038	0.0002	0.03	0.0048	0.0086	0	0.0017	0.0021	0	0	0	0.0055	0	0.0072	0.0005	0	0	0.0057	0.0012	0	0.0002	0.0007	0.0002	0	0	0.001	0	0
5_28	5	28	Vaccinated	1	CVD1255	Admixed (Indochina, Indonesia)	III	7235	0.3685	0.0148	0.0077	0.2948	0.0036	0.0001	0.0043	0.0051	0.0017	0.0059	0.0221	0.0153	0.001	0.003	0.1202	0.0022	0	0.0021	0.0048	0	0	0	0	0	0.0003	0	0	0.0007	0	0	0.0001	0	0.0001	0.0028	0.001	0	0.0079	0.0006	0	0	0
5_29	5	29	Vaccinated	1	CVD1255	Admixed (Indochina, Indonesia)	III	6139	0.4395	0.0023	0.0041	0.2122	0.0036	0.0228	0.0033	0.0011	0.0026	0.0121	0.0275	0.0176	0.0015	0.0034	0.0047	0.0036	0	0.0186	0.0067	0.0005	0.0008	0	0	0	0.0008	0	0.0002	0.0003	0	0	0	0	0	0.0018	0.001	0	0.0259	0	0	0	0
5_30	5	30	Vaccinated	1	CVD1255	Admixed (Indochina, Indonesia)	III	7559	0.653	0.0005	0.0111	0.0214	0.004	0.1574	0.0015	0.0045	0.0026	0.0144	0.0204	0.0033	0.0053	0.0009	0.0005	0.0011	0	0.0042	0.0003	0.0008	0.0005	0	0	0	0.0004	0	0.0003	0	0.0001	0	0.0001	0	0	0.0003	0.0007	0.0003	0.0015	0	0.0001	0	0
5_31	5	31	Vaccinated	1	CVD1255	Admixed (Indochina, Indonesia)	III	8169	0.939	0	0.0007	0.0037	0.0004	0.0024	0.0011	0.0023	0	0.0001	0.025	0.001	0	0.0002	0.0013	0.0001	0	0.0004	0.0001	0	0.0001	0	0	0	0.0001	0	0	0	0	0	0	0	0.0001	0	0	0	0.0018	0	0	0	0
5_32	5	32	Vaccinated	1	CVD1255	Admixed (Indochina, Indonesia)	III	8780	0.7664	0.0002	0.0003	0.0131	0.0005	0.0005	0.0018	0.0007	0.0003	0	0.1642	0.0026	0	0.0006	0	0.0002	0	0.0009	0	0	0	0	0	0	0.0001	0	0	0	0	0	0	0	0	0	0.0001	0	0.0016	0	0	0	0
5_35	5	35	Vaccinated	1	CVD1255	Admixed (Indochina, Indonesia)	IV	8277	0.4537	0.0021	0.0008	0.0511	0.0029	0.2015	0.0025	0.0047	0.0042	0.0002	0.0628	0.0023	0.0001	0.0014	0.048	0.0004	0	0.0253	0.0013	0.0005	0	0	0	0	0.0004	0	0	0.0004	0	0	0	0	0	0.0005	0.0006	0	0.0027	0	0	0	0
5_56	5	56	Vaccinated	1	CVD1255	Admixed (Indochina, Indonesia)	IV	6634	0.0826	0.0002	0.036	0.0404	0.0203	0.0321	0.0121	0.1486	0.0265	0.0023	0.0191	0.0059	0.0017	0.0002	0	0.0014	0	0.0176	0	0.0002	0.0036	0	0	0	0.0006	0	0.0003	0.0038	0	0	0	0	0	0	0.0015	0	0.0018	0.0002	0.0054	0	0
5_57	5	57	Vaccinated	1	CVD1255	Admixed (Indochina, Indonesia)	III	6637	0.6932	0.0014	0.0524	0.1023	0.0041	0.0057	0.002	0.0125	0.0026	0.0017	0.0134	0.0017	0.0006	0.0003	0.0005	0.0017	0	0.0081	0	0	0.0012	0	0	0	0.0002	0	0	0.0005	0	0	0.0002	0	0.0002	0	0.0015	0	0.0014	0.0006	0.0032	0	0
5_58	5	58	Vaccinated	1	CVD1255	Admixed (Indochina, Indonesia)	I	5337	0.2428	0.0002	0.1589	0.0517	0.0154	0.0006	0.0041	0.0532	0.0054	0.0139	0.0022	0.0021	0.0015	0.0036	0	0.0019	0.0002	0.0354	0	0.0002	0.0028	0	0	0	0.0009	0	0.0006	0.0045	0	0	0.0006	0	0	0	0.0052	0	0.0032	0.003	0.0034	0	0
5_59	5	59	Vaccinated	1	CVD1255	Admixed (Indochina, Indonesia)	IV	6620	0.2145	0.0002	0.0869	0.0314	0.0264	0.1563	0.0066	0.1165	0.0104	0.0038	0.003	0.0048	0.0006	0.003	0.0328	0.0006	0.0003	0.0057	0.0006	0.0006	0.0029	0	0	0	0.0014	0	0	0.0045	0	0	0	0	0.0002	0	0.0017	0	0.0023	0.0086	0.0036	0.0002	0
5_60	5	60	Vaccinated	1	CVD1255	Admixed (Indochina, Indonesia)	IV	8133	0.1187	0.0009	0.0339	0.0516	0.0237	0.0585	0.0123	0.2154	0.0075	0.0007	0.0074	0.0039	0.0012	0.0011	0.0038	0.0007	0.0001	0.0037	0.0001	0	0.001	0.0001	0	0	0.0007	0	0.0001	0.0023	0	0	0.0001	0	0	0	0.0007	0	0.01	0.0016	0.0016	0	0
5_63	5	63	Vaccinated	1	CVD1255	Admixed (Indochina, Indonesia)	III	8520	0.4149	0.0011	0.0035	0.0958	0.01	0.0014	0.0088	0.1634	0.002	0.0001	0.0068	0.0257	0	0.0001	0	0.0005	0	0.0008	0	0.0001	0.0002	0	0	0	0.0001	0	0	0.0022	0	0	0	0	0	0	0.0002	0	0.0011	0.0002	0.0018	0	0
5_70	5	70	Vaccinated	1	CVD1255	Admixed (Indochina, Indonesia)	IV	8339	0.0988	0.0001	0.0128	0.0091	0.0086	0.522	0.0026	0.042	0.0013	0	0.0052	0.0052	0.0002	0.0006	0.0155	0	0	0.0133	0.0038	0.0001	0.0005	0	0	0	0.0005	0	0.0001	0.002	0	0	0.0002	0	0	0	0.0004	0	0.001	0.0004	0.0018	0	0
5_84	5	84	Vaccinated	1	CVD1255	Admixed (Indochina, Indonesia)	III	8140	0.4902	0.0109	0.028	0.0038	0.0446	0.0147	0.0023	0.0652	0.0109	0.0053	0.0014	0.0022	0.0018	0.0001	0	0.0017	0.0009	0.0052	0	0.0004	0.0001	0	0	0	0.001	0	0.0006	0.0015	0.0001	0	0.0027	0	0	0	0.0004	0	0.0001	0	0.0025	0	0
6_0	6	0	Vaccinated	1	CVD1255	Philippines	I	4199	0.493	0.2682	0.0319	0.0014	0.0231	0	0.0195	0.009	0.0198	0.0064	0.0002	0.001	0.0031	0.0007	0.0002	0.0036	0.0002	0.0083	0	0.0038	0.0012	0	0	0	0.0012	0	0.0005	0.0014	0	0	0	0.0005	0.0005	0	0.0002	0	0.0007	0	0.0029	0	0
6_1	6	1	Vaccinated	1	CVD1255	Philippines	I	3876	0.581	0.1602	0.0402	0.0008	0.0263	0	0.0632	0.0008	0.0044	0.0114	0.0008	0.0021	0.0015	0.0026	0.0003	0.0044	0.0015	0	0.0003	0.0023	0.0005	0.0015	0	0	0.0015	0	0.0036	0.0005	0	0	0.001	0	0.0003	0	0.0005	0	0	0.0005	0.0003	0	0
6_2	6	2	Vaccinated	1	CVD1255	Philippines	I	3529	0.4455	0.1547	0.119	0.0009	0.0241	0.0006	0.0278	0.0028	0.0065	0.0079	0.0003	0.0017	0.0034	0.0017	0.0003	0.0037	0.0128	0.0003	0	0	0.0017	0.0014	0	0	0.0009	0	0.0011	0.0003	0.0003	0	0.0003	0	0	0	0.0003	0	0	0.002	0.002	0	0
6_7	6	7	Vaccinated	1	CVD1255	Philippines	I	4277	0.1256	0.4403	0.1999	0.0002	0.0166	0	0.1162	0.0002	0.0075	0.0042	0.0002	0.0021	0.0002	0.0009	0.0016	0.0007	0.0002	0.0009	0.0019	0.0012	0.0005	0.0021	0	0	0.0007	0	0.0005	0.0009	0	0	0.0009	0.0002	0.0014	0	0.0002	0.0002	0	0.0016	0.0019	0	0
6_14	6	14	Vaccinated	1	CVD1255	Philippines	I	4507	0.1589	0.4103	0.1109	0	0.0304	0.0013	0.0845	0.0024	0.0093	0.0064	0.0002	0.0018	0.0051	0.0036	0.0018	0.0031	0.0004	0.0009	0.0002	0.002	0.002	0.0036	0	0	0.0038	0	0.0016	0.0018	0	0	0.0007	0.0004	0.0007	0.0002	0.0002	0	0	0.0007	0.0004	0	0
6_28	6	28	Vaccinated	1	CVD1255	Philippines	III	7302	0.6509	0.1279	0.0034	0.1213	0.0008	0.0073	0.0015	0.0063	0.0003	0	0.0308	0.0019	0.0003	0.0003	0.0003	0.0004	0	0.0008	0.0033	0	0	0.0001	0	0	0	0	0	0	0	0	0	0	0	0.001	0.0004	0	0.0005	0	0.0001	0	0
6_29	6	29	Vaccinated	1	CVD1255	Philippines	I	6464	0.4222	0.3676	0.0051	0.0054	0.0034	0.0022	0.0433	0.0187	0.0009	0.0119	0.002	0.0017	0.0127	0	0.0011	0.0005	0	0.0043	0.0006	0.0002	0.0012	0.0005	0	0	0	0	0	0.0005	0.0003	0	0.0002	0	0	0.0002	0.0002	0.002	0.0002	0.0005	0.0003	0	0
6_30	6	30	Vaccinated	1	CVD1255	Philippines	III	7190	0.6978	0.1727	0.0025	0.0079	0.0011	0.0211	0.0036	0.0159	0.0001	0.0017	0.0131	0.001	0.0018	0.0006	0.0015	0	0	0.0001	0	0	0.0007	0	0	0	0	0	0	0	0	0	0	0	0.0003	0.0017	0.0003	0	0.0018	0.0001	0.0003	0	0
6_31	6	31	Vaccinated	1	CVD1255	Philippines	III	8137	0.8216	0.0462	0.0066	0.03	0.0009	0.0028	0.0009	0.0116	0.0004	0.0001	0.015	0.0023	0.0001	0	0.0061	0.0004	0	0.0004	0.0009	0	0.0009	0.0002	0	0	0.0001	0	0	0	0	0	0.0001	0	0	0.0025	0	0	0.0037	0	0.0007	0	0
6_32	6	32	Vaccinated	1	CVD1255	Philippines	III	9028	0.7117	0.1931	0.0006	0.0122	0.0018	0.0167	0.001	0.0028	0.0003	0	0.0184	0.0028	0.0007	0.0001	0.0043	0	0	0.0004	0.0002	0.0001	0.0001	0.0001	0	0	0	0.0001	0	0.0001	0	0	0.0001	0	0	0.0007	0.0001	0	0.0003	0	0	0	0
6_35	6	35	Vaccinated	1	CVD1255	Philippines	IV	7408	0.3537	0.1019	0.0007	0.0154	0.0019	0.4534	0.0019	0.0013	0.0004	0.0009	0.0173	0.0024	0	0.0005	0.0012	0.0004	0	0.0012	0.0008	0	0.0015	0	0	0	0	0	0.0001	0	0	0	0	0	0.0016	0	0.0008	0	0.0008	0.0001	0	0	0
6_56	6	56	Vaccinated	1	CVD1255	Philippines	I	7415	0.0523	0.4402	0.1389	0.1652	0.0045	0.0703	0.0063	0.0436	0.0001	0.0035	0.0013	0.0012	0	0.0005	0.0005	0.0005	0	0.0013	0	0	0.0005	0.0001	0	0	0.0008	0	0	0.0004	0	0	0.0001	0	0	0	0.0078	0	0.0005	0.0005	0.0012	0	0
6_58	6	58	Vaccinated	1	CVD1255	Philippines	I	6479	0.4691	0.223	0.0066	0.0023	0.0097	0.0153	0.0147	0.0826	0.002	0	0.0057	0.0052	0.0002	0.0002	0.0002	0	0	0.0015	0	0.0002	0.0003	0.0002	0	0	0	0.0002	0	0.0015	0	0	0	0	0.0066	0	0.0008	0	0.0005	0.0002	0.0002	0	0
6_59	6	59	Vaccinated	1	CVD1255	Philippines	III	7408	0.46	0.132	0.0193	0.0084	0.012	0.0109	0.0039	0.1412	0.0016	0.0004	0.0324	0.0016	0.0003	0.0001	0.0082	0	0	0.0018	0	0	0.0003	0	0	0	0.0001	0	0	0.002	0	0	0	0	0.0009	0	0.0004	0	0.0003	0	0.0018	0	0
6_60	6	60	Vaccinated	1	CVD1255	Philippines	III	8934	0.5039	0.1977	0.0051	0.004	0.0029	0.1042	0.0021	0.0365	0.0008	0.0002	0.0637	0.0024	0.0004	0	0.005	0	0.0001	0.0008	0	0	0	0.0002	0	0	0	0	0	0.0009	0	0	0.0001	0	0.0003	0	0.0001	0	0.0028	0	0.0003	0	0
6_63	6	63	Vaccinated	1	CVD1255	Philippines	IV	6011	0.2968	0.0491	0.0067	0.0274	0.0018	0.4933	0.0015	0.0082	0.0007	0.0003	0.0684	0.0033	0.0005	0.0002	0.0002	0.0002	0	0.0003	0	0.0002	0	0	0	0	0	0	0	0.0002	0	0	0	0	0	0	0.001	0	0.0013	0.0002	0	0.0002	0
6_70	6	70	Vaccinated	1	CVD1255	Philippines	I	7694	0.1584	0.3092	0.0164	0.0022	0.0164	0.0898	0.0521	0.011	0.0035	0.0005	0.0019	0.0005	0.0003	0.0003	0.0008	0	0.0001	0.0094	0	0	0.0044	0	0.0004	0	0.0008	0	0.0003	0.0022	0	0	0.0001	0	0.007	0	0.0053	0	0.0004	0.0001	0.0057	0.0001	0
6_84	6	84	Vaccinated	1	CVD1255	Philippines	I	8736	0.1981	0.5762	0.0032	0.0158	0.0026	0.0839	0.0015	0.0073	0.0013	0.0007	0.0094	0.0095	0.0015	0.0005	0.0017	0.0001	0	0.0038	0.0002	0.0006	0.0003	0.0002	0	0	0.0001	0	0	0.003	0	0	0.0002	0	0.0079	0	0.0054	0	0.0001	0	0.0002	0	0
7_0	7	0	Vaccinated	1	CVD1255	Philippines	I	3483	0.2934	0.2314	0.0666	0.0034	0.0396	0	0.0121	0.0072	0.033	0.0066	0.0003	0.0126	0.0017	0.0032	0	0.004	0.0167	0.0049	0	0.0017	0.002	0.0009	0	0	0.0017	0	0.002	0.0011	0.0009	0	0.0057	0.002	0	0	0.0003	0.0003	0.0017	0.0011	0.0037	0	0
7_1	7	1	Vaccinated	1	CVD1255	Philippines	III	3601	0.8753	0.0486	0.0022	0.0003	0.0047	0.0003	0.0003	0	0.0031	0.0075	0	0.0006	0.0081	0.0011	0	0.0042	0.0017	0.0006	0	0.0042	0.0011	0	0	0	0.0025	0	0.0019	0.0014	0	0	0.0003	0.0014	0	0	0.0014	0.0003	0	0	0.0003	0	0
7_2	7	2	Vaccinated	1	CVD1255	Philippines	III	3763	0.725	0.0263	0.0563	0.0003	0.0157	0	0.0069	0.0016	0.0194	0.0043	0.0005	0.0045	0.0013	0.0008	0.0008	0.005	0.0037	0.0029	0.0011	0.0019	0.0013	0.0005	0	0	0.0008	0	0.0003	0.0016	0	0	0.0027	0.0011	0	0	0.0011	0.0003	0.0005	0	0.0029	0	0
7_7	7	7	Vaccinated	1	CVD1255	Philippines	I	4418	0.1829	0.1888	0.108	0.0038	0.053	0.0002	0.0161	0.0045	0.033	0.0081	0.0005	0.0249	0.0023	0.007	0	0.0081	0.0183	0.0084	0	0.0025	0.0009	0.002	0	0	0.0041	0	0.002	0.0113	0.0002	0	0.01	0.0014	0	0	0.0002	0	0	0.0016	0.0045	0	0
7_14	7	14	Vaccinated	1	CVD1255	Philippines	I	3656	0.3135	0.5594	0.0044	0.0049	0.0071	0	0.0003	0	0.0022	0.0109	0	0.0022	0.0057	0.0027	0.0011	0.0036	0.0027	0.0014	0	0.0085	0.0016	0.0008	0	0	0.0055	0	0.0019	0.0008	0	0	0.0005	0.0003	0	0	0.0014	0.0005	0.0005	0.0005	0	0	0
7_29	7	29	Vaccinated	1	CVD1255	Philippines	I	6266	0.3969	0.4259	0.071	0.0069	0.0019	0.0024	0.0016	0.0003	0.0005	0.029	0.0022	0.0011	0.0022	0.0021	0.0054	0.003	0	0.0003	0.001	0.0008	0.0014	0.0013	0	0	0.0002	0	0	0	0	0	0	0	0.0005	0.0005	0.0008	0.0014	0.0014	0.0003	0.0005	0	0
7_30	7	30	Vaccinated	1	CVD1255	Philippines	III	8520	0.6951	0.1903	0.0043	0.068	0.0006	0.0002	0.0013	0.0008	0.0001	0.0001	0.0027	0.0018	0.0006	0.0018	0.0023	0.0002	0	0	0.0005	0.0001	0	0	0	0	0	0	0	0.0001	0	0	0	0	0	0.0011	0.0001	0	0.0006	0	0	0	0
7_31	7	31	Vaccinated	1	CVD1255	Philippines	III	6739	0.6099	0.0148	0.0055	0.0668	0.0083	0.0165	0.0022	0.0086	0.0024	0.0004	0.0043	0.0061	0.0021	0.0006	0.0028	0.0001	0	0.0013	0	0.0001	0.0013	0.0007	0	0	0	0	0	0.0004	0	0	0	0	0.001	0.0004	0.0007	0	0.0007	0.0001	0.0018	0	0
7_32	7	32	Vaccinated	1	CVD1255	Philippines	I	8107	0.4058	0.0757	0.0882	0.0364	0.0268	0.0016	0.003	0.0078	0.008	0.0106	0.0058	0.0019	0.0697	0.016	0.001	0.009	0.0004	0.0015	0.0004	0.0021	0.0168	0.0032	0	0	0.0007	0	0.0007	0.0017	0	0	0.0006	0	0	0.0002	0.0021	0.0011	0.0015	0.0026	0.0007	0	0
7_35	7	35	Vaccinated	1	CVD1255	Philippines	I	7927	0.3407	0.3375	0.0134	0.0878	0.0074	0.0063	0.0015	0.0087	0.0028	0.0204	0.0088	0.0023	0.0016	0.0003	0.0091	0.0013	0	0.0006	0	0.0014	0.0072	0.0021	0	0	0.0003	0	0.0001	0.0001	0	0	0	0	0.0001	0.0004	0.0015	0	0.0018	0.0001	0.005	0	0
7_56	7	56	Vaccinated	1	CVD1255	Philippines	IV	8852	0.1114	0.0003	0.0071	0.0421	0.0183	0.0555	0.0031	0.2293	0.0052	0	0.005	0.0044	0	0.0003	0.0008	0.0001	0.0003	0.0026	0	0.0006	0.0006	0.0008	0	0	0.0001	0	0	0.0018	0	0	0	0	0.0024	0	0.0007	0	0.0002	0.0005	0.002	0	0.0001
7_57	7	57	Vaccinated	1	CVD1255	Philippines	IV	9436	0.2217	0.0172	0.0595	0.1462	0.0082	0.3691	0.0022	0.0296	0.0028	0.0016	0.0127	0.0052	0.0043	0.0003	0.0016	0.0003	0	0.0003	0.0008	0.0012	0.0006	0.0003	0	0	0.0008	0.0005	0	0.0002	0	0	0.0001	0	0.0002	0	0.0015	0.0001	0.0055	0.0004	0.0032	0	0
7_58	7	58	Vaccinated	1	CVD1255	Philippines	IV	8002	0.0529	0.0019	0.001	0.0047	0.001	0.2034	0.0001	0.0094	0.0001	0	0.0005	0.0001	0	0	0.0022	0	0	0	0	0.0001	0	0	0.0012	0	0.0001	0.4804	0	0	0	0	0	0	0.0524	0.0001	0.0004	0	0	0.0002	0.0002	0.0119	0.004
7_59	7	59	Vaccinated	1	CVD1255	Philippines	IV	7361	0.1733	0.0034	0.0167	0.0679	0.0049	0.5578	0.0004	0.0185	0.0014	0.0003	0.0011	0.0003	0	0	0.0261	0	0	0.0005	0.0001	0.0003	0.0018	0.0014	0	0	0	0	0	0	0	0	0.0001	0.0001	0.0082	0	0.0005	0	0	0	0.0016	0	0
7_63	7	63	Vaccinated	1	CVD1255	Philippines	IV	6082	0.1541	0.0002	0.0561	0.1424	0.0194	0.0776	0.0046	0.1656	0.0036	0	0.0187	0.014	0.0002	0	0	0.0003	0	0.0018	0.0002	0.0008	0.003	0.0007	0	0	0	0	0	0.0008	0	0	0	0	0	0	0.0007	0	0.0018	0.0003	0.0084	0	0
7_70	7	70	Vaccinated	1	CVD1255	Philippines	II	8789	0.0308	0.0666	0.4919	0.0088	0.018	0.0034	0.0035	0.0181	0.0017	0.0083	0.0008	0.0033	0.0013	0.0894	0.0001	0.0073	0.0005	0.0215	0.023	0.0036	0.0013	0.0006	0	0	0.0035	0	0.0002	0.0014	0	0	0.0003	0	0.0002	0	0.009	0.0033	0.0022	0.0077	0.0018	0	0
7_84	7	84	Vaccinated	1	CVD1255	Philippines	III	6630	0.7047	0.0003	0.0089	0.0066	0.0069	0.0002	0.0021	0	0.0003	0.0024	0	0.0018	0.0054	0.0537	0.0012	0.0125	0	0	0.1074	0	0.0003	0	0	0	0.0005	0	0.0011	0.0003	0	0	0	0	0.0002	0	0.021	0	0.003	0.0002	0.0008	0	0
8_0	8	0	Vaccinated	1	PBS	Indochina	I	3933	0.4938	0.1993	0.0097	0.0353	0.0125	0.0003	0.0043	0	0.0071	0.0076	0	0.0058	0.0018	0.0013	0.0107	0.0094	0.0064	0.027	0.001	0.0071	0.0028	0.0031	0	0	0.0056	0	0	0.0005	0	0	0.0003	0.0013	0.0188	0.0003	0.0008	0	0.0003	0	0.002	0	0
8_1	8	1	Vaccinated	1	PBS	Indochina	III	3067	0.7062	0.06	0.0114	0.0153	0.0215	0	0.0059	0.0016	0.0121	0.0088	0.001	0.0039	0.0026	0.0052	0	0.015	0.0013	0.0143	0	0.001	0	0.0059	0	0	0.0055	0	0.0023	0	0	0	0	0.001	0	0	0.0003	0.0003	0	0.0003	0.002	0	0
8_2	8	2	Vaccinated	1	PBS	Indochina	I	4817	0.4953	0.1657	0.0467	0.0058	0.0183	0.0015	0.0062	0.0079	0.0118	0.0066	0.0002	0.0046	0.0035	0.0027	0.0079	0.0062	0.0102	0.0021	0	0.001	0.0006	0.0039	0	0	0.0015	0	0.001	0.0021	0.0031	0	0.0019	0.0017	0	0.0004	0.0002	0.0006	0	0.0019	0.0017	0	0
8_7	8	7	Vaccinated	1	PBS	Indochina	I	7020	0.3162	0.0506	0.0708	0.0041	0.037	0.0006	0.0161	0.0255	0.0231	0.0057	0	0.0051	0.0046	0.0033	0.0006	0.005	0.0185	0.0097	0	0.0027	0.0006	0.0056	0	0	0.0014	0	0.0024	0	0.0588	0	0.0016	0.0004	0.0004	0	0.0004	0.0011	0	0.0003	0.0014	0	0
8_14	8	14	Vaccinated	1	PBS	Indochina	I	6458	0.5587	0.0474	0.0475	0.0177	0.0269	0.0003	0.0159	0.0026	0.0178	0.009	0.0005	0.0015	0.0056	0.0028	0.0029	0.0074	0.0037	0.0438	0.0002	0.0043	0.0015	0.0026	0	0	0.006	0	0.0025	0.0012	0.0005	0	0.0009	0.0005	0.0006	0.0002	0.0006	0.0003	0	0.0002	0.002	0	0
8_28	8	28	Vaccinated	1	PBS	Indochina	III	9078	0.7736	0.0073	0.0004	0.087	0.0012	0.0132	0.0031	0.0026	0.001	0.0002	0.0011	0.0032	0	0.0002	0.0007	0	0	0.0425	0	0.0001	0	0	0	0	0.0002	0	0.0002	0.0003	0	0	0	0	0.0007	0.0007	0.0002	0	0.0011	0	0	0	0
8_29	8	29	Vaccinated	1	PBS	Indochina	III	6233	0.7824	0.0478	0.0014	0.0361	0.0024	0.0375	0.0016	0.004	0.003	0.0022	0.0019	0.0027	0.0003	0	0.0011	0	0	0.0237	0.0008	0.0011	0	0.0005	0	0	0	0	0.0002	0.0003	0	0	0	0	0.003	0.0002	0.0002	0	0	0	0.0002	0	0
8_30	8	30	Vaccinated	1	PBS	Indochina	III	7437	0.8709	0.0034	0.0005	0.025	0.0024	0.0005	0.0027	0.0055	0.0024	0.0003	0.0056	0.0093	0	0.0016	0.0125	0.0004	0	0.0044	0.0009	0.0001	0	0.0004	0	0	0.0001	0	0	0.0004	0	0	0	0	0.0013	0.0007	0.0001	0	0.0013	0	0	0	0
8_31	8	31	Vaccinated	1	PBS	Indochina	III	6893	0.5641	0	0.003	0.018	0.008	0.0315	0.0017	0.0981	0.002	0.0013	0.0142	0.0003	0.0001	0.0004	0.0019	0.0007	0	0.1256	0.0003	0.0007	0.0009	0.0017	0	0	0.0003	0	0.0001	0.0003	0	0	0.0001	0	0.0046	0.0004	0.0004	0	0.0015	0	0	0	0
8_32	8	32	Vaccinated	1	PBS	Indochina	III	8927	0.6266	0.0002	0.0019	0.0491	0.0041	0.0193	0.0016	0.0686	0.0004	0.0003	0.019	0.0012	0	0	0.0037	0.0002	0	0.1005	0.0018	0.0011	0.0001	0.0002	0	0	0.0008	0	0	0.0006	0	0	0	0	0.0003	0.0003	0.0007	0	0.0016	0.0003	0	0	0
8_35	8	35	Vaccinated	1	PBS	Indochina	III	8821	0.298	0.1051	0.0017	0.1934	0.0316	0.0009	0.0037	0.0083	0.0126	0.0158	0.0224	0.0402	0.0026	0.0049	0.0007	0.0029	0	0.0358	0.0084	0	0.0007	0.0026	0	0	0.0022	0	0.0002	0.0006	0.0012	0	0.0001	0.0001	0	0.005	0.0023	0.0002	0.0078	0	0	0	0
8_56	8	56	Vaccinated	1	PBS	Indochina	IV	6536	0.3695	0.0026	0.0038	0.0903	0.0058	0.1776	0.0031	0.0266	0.0049	0.0008	0.0505	0.006	0.0003	0.0006	0.0003	0	0	0.0024	0.0002	0.0005	0.0002	0	0	0	0.0002	0	0	0.0006	0.0003	0	0	0	0.0072	0	0.0008	0	0.0008	0.0002	0.0012	0	0
8_57	8	57	Vaccinated	1	PBS	Indochina	III	7268	0.4389	0.2171	0.0274	0.0385	0.0059	0.0817	0.0032	0.0191	0.0021	0.0032	0.011	0.0039	0.01	0.0003	0	0.0003	0	0.0008	0	0	0.0022	0	0	0	0.0003	0	0	0.0008	0.0003	0.0001	0.0006	0	0	0.0001	0.0014	0.0017	0.0022	0.0003	0.0056	0	0
8_58	8	58	Vaccinated	1	PBS	Indochina	III	5595	0.8781	0.0046	0	0.0036	0.0009	0.0286	0	0	0.0005	0	0	0	0	0	0.0009	0	0	0	0	0	0	0	0	0	0	0	0	0	0.0002	0	0	0	0.0002	0.0021	0	0	0	0	0	0.0318	0.037
8_59	8	59	Vaccinated	1	PBS	Indochina	I	9595	0.0105	0.0033	0.0002	0	0.0001	0.0006	0	0	0.0001	0.0001	0.0001	0	0.0004	0	0.0116	0	0	0	0	0	0	0	0	0.3131	0	0	0.0005	0	0.0001	0.4237	0	0	0.0027	0	0	0	0	0.0001	0	0.0233	0.1933
8_60	8	60	Vaccinated	1	PBS	Indochina	I	10671	0.0108	0.0004	0.0005	0.0019	0.0008	0	0.0025	0	0.0004	0.0029	0	0	0.0004	0	0.0011	0.0021	0	0	0	0	0	0	0	0.1794	0.0001	0.0001	0.0713	0.0001	0	0.4581	0	0	0	0	0	0	0	0.0004	0	0.0714	0.0933
8_63	8	63	Vaccinated	1	PBS	Indochina	IV	8624	0.0007	0	0.001	0.321	0.0003	0.648	0.0006	0	0.0002	0	0	0	0	0.0001	0.0007	0.0001	0	0	0	0	0	0	0	0	0.0001	0	0.0006	0.0013	0	0	0	0	0	0	0	0	0	0	0	0	0
8_70	8	70	Vaccinated	1	PBS	Indochina	III	6677	0.6365	0	0.0328	0.0812	0.0093	0.0367	0.0039	0.093	0.0043	0.0004	0	0.0001	0	0.0007	0.0042	0.0009	0	0	0.0006	0	0.001	0	0.0006	0	0.0027	0	0.0006	0.0043	0	0	0.0003	0	0	0.0003	0.0013	0	0	0	0	0	0
8_84	8	84	Vaccinated	1	PBS	Indochina	IV	7755	0.103	0	0.0275	0.062	0.0067	0	0.004	0.0616	0.0059	0.0004	0.0382	0.0161	0.0005	0.0003	0.356	0.0006	0	0.0111	0.0004	0.0004	0	0	0	0	0.0001	0	0	0.0034	0	0	0	0	0.0001	0	0.0022	0	0.0006	0	0.0083	0	0
9_0	9	0	PBS Control	1	PBS	Indochina	I	4738	0.122	0.0549	0.0648	0.0068	0.039	0.0002	0.0247	0.0006	0.0146	0.0173	0.0011	0.0236	0.0103	0.0042	0.0008	0.015	0.0023	0.0087	0.0004	0.0011	0.0002	0.0011	0.0004	0	0.0074	0	0.0076	0.0017	0	0	0.0017	0.0011	0.0032	0.0004	0.0004	0.0006	0.0002	0.0002	0	0	0
9_1	9	1	PBS Control	1	PBS	Indochina	III	2648	0.7598	0.0106	0.0321	0.0015	0.0204	0	0.0023	0.0004	0.0068	0.0329	0.0004	0.0064	0.0064	0.0083	0.0053	0.0106	0.0015	0.0019	0	0.0057	0.0011	0.003	0	0	0.0015	0	0.0049	0.0008	0	0	0.0004	0.0011	0.0004	0	0.0008	0.0008	0.0004	0.0004	0.0004	0	0
9_2	9	2	PBS Control	1	PBS	Indochina	I	3098	0.428	0.0023	0.0649	0.0029	0.0378	0	0.0294	0.0019	0.0168	0.0116	0.0003	0.0526	0.0003	0.0026	0.001	0.0065	0.0019	0.0081	0	0.0077	0.0006	0.0032	0	0	0.0032	0	0.0013	0.0029	0	0	0.0032	0	0	0	0	0.0003	0.0003	0	0.0013	0	0
9_7	9	7	PBS Control	1	PBS	Indochina	I	4090	0.3853	0.0117	0.0088	0.0044	0.0543	0.0007	0.0073	0.0024	0.0482	0.0059	0.0024	0.0159	0.0039	0.0159	0.0071	0.0142	0.0007	0.0159	0.0012	0.0027	0.0002	0	0	0	0.0066	0	0.0034	0.0064	0	0	0.0005	0.0005	0.0012	0	0.0007	0.0005	0	0.0005	0.0007	0	0
9_14	9	14	PBS Control	1	PBS	Indochina	III	3741	0.4782	0.0396	0.0008	0.0115	0.0187	0.0003	0.0024	0	0.0091	0.0112	0.008	0.0016	0.0099	0.0243	0.0008	0.0136	0	0.0024	0.0053	0.0013	0	0	0	0	0.0139	0	0.0099	0.0021	0	0	0.0016	0.0019	0.0005	0	0.0008	0.0021	0.0008	0	0	0	0
9_28	9	28	PBS Control	1	PBS	Indochina	III	6746	0.8494	0.0437	0.0019	0.0283	0.0019	0.0046	0.0019	0.0013	0.0006	0.0114	0.0059	0.0013	0.0019	0.0022	0.0006	0.0024	0	0	0	0.0001	0.0004	0.001	0	0	0.0006	0	0	0	0	0	0	0	0.0001	0.0004	0.0006	0.0001	0.0042	0.0003	0	0	0
9_29	9	29	PBS Control	1	PBS	Indochina	III	6469	0.8544	0.0068	0.0003	0.0314	0.0012	0.002	0.0028	0.0003	0.0006	0.0006	0.0577	0.0045	0.0002	0	0.004	0.0002	0	0.0002	0.0003	0	0	0.0002	0	0	0	0	0	0.0006	0	0	0	0	0.0003	0.0003	0.0002	0	0.0019	0.0002	0	0	0
9_30	9	30	PBS Control	1	PBS	Indochina	III	8022	0.5875	0.0092	0.0045	0.0717	0.0056	0.0032	0.0041	0.0016	0.0022	0.01	0.1426	0.0132	0.0031	0.0017	0.0051	0.0012	0	0.0004	0.0128	0	0	0.0001	0.0001	0	0.0001	0	0.0002	0.0025	0	0	0.0006	0	0.0007	0.001	0.001	0	0.0027	0	0	0	0
9_31	9	31	PBS Control	1	PBS	Indochina	III	5652	0.8287	0.0028	0.0014	0.0249	0.0041	0.0009	0.0025	0.0041	0.0016	0.0055	0.0458	0.0016	0.0035	0.0011	0	0.0005	0	0.0025	0.0002	0	0	0	0	0	0	0	0	0.0009	0	0	0	0	0	0.0007	0	0	0.0012	0	0	0	0
9_32	9	32	PBS Control	1	PBS	Indochina	III	7569	0.7869	0.0061	0.0013	0.0143	0.0037	0.0585	0.0005	0.0026	0.0017	0.0054	0.0518	0.0005	0.0077	0.0003	0.0001	0.0003	0	0.0022	0	0	0	0	0	0	0	0	0	0.0001	0	0	0	0	0.0041	0.0001	0.0001	0.0001	0.0007	0	0	0	0
9_35	9	35	PBS Control	1	PBS	Indochina	III	9027	0.747	0.0192	0.003	0.0451	0.0006	0.1185	0.0044	0.0004	0	0.0037	0.0132	0.0002	0.0009	0.0006	0.0002	0.0007	0	0.0006	0.0012	0	0.0001	0.0002	0	0	0.0001	0	0.0006	0.0007	0	0	0	0	0.0004	0.0002	0.0004	0.0001	0.0012	0.0002	0	0	0
9_56	9	56	PBS Control	1	PBS	Indochina	IV	7442	0.0445	0.0013	0.0306	0.0927	0.016	0.4691	0.0054	0.0079	0.0035	0.0032	0.0318	0.0024	0	0.0011	0.0726	0.0011	0	0.0023	0.0001	0.0001	0.0021	0	0	0	0.0008	0	0.0001	0.0027	0	0	0	0	0	0	0.0017	0.0005	0.0149	0.0001	0.0008	0	0
9_57	9	57	PBS Control	1	PBS	Indochina	IV	6641	0.2012	0.1236	0.061	0.0896	0.0098	0.2477	0.0026	0.0047	0.0027	0.005	0.0297	0.0009	0.0711	0.0029	0.0126	0.0033	0	0.0009	0.0015	0.0005	0.0015	0	0	0	0.0005	0	0.0014	0.0009	0	0	0.0005	0	0.0003	0	0.0026	0.0012	0.0044	0.0009	0.0024	0	0
9_58	9	58	PBS Control	1	PBS	Indochina	III	8183	0.0598	0.0017	0	0.0001	0.011	0.0087	0.001	0.0028	0.0011	0	0.0004	0	0	0	0.0004	0	0	0	0	0.0005	0	0	0	0.8322	0.0001	0	0	0.0012	0	0	0	0	0	0.0002	0.0001	0	0	0	0	0.0544	0.0095
9_59	9	59	PBS Control	1	PBS	Indochina	IV	7477	0.5221	0.0003	0.0163	0.0734	0.0158	0.2719	0.0025	0.0005	0.0035	0	0.0023	0.0066	0	0.0011	0.0007	0.0016	0	0.0003	0	0	0.0012	0.0004	0	0	0.0001	0	0	0.0023	0	0	0.0003	0.0007	0	0	0	0	0.0126	0.0007	0.0007	0	0
9_60	9	60	PBS Control	1	PBS	Indochina	IV	8029	0.048	0.0001	0.0873	0.0014	0.0706	0.2554	0.0174	0.0172	0.0131	0	0	0.0037	0	0.0103	0.2619	0.0011	0.0005	0.0014	0.0006	0	0.0011	0	0	0	0.0015	0	0	0.0159	0	0	0.0019	0	0.0005	0.0001	0.0001	0	0	0.0007	0	0.0007	0
9_70	9	70	PBS Control	1	PBS	Indochina	III	8040	0.5035	0.0019	0.0087	0.1586	0.0044	0.1494	0.0104	0.0133	0.0034	0.0002	0.0474	0.0036	0.0006	0.0056	0.0001	0.0006	0.0002	0.0001	0.0051	0	0	0	0	0	0.0002	0	0.0009	0.0016	0	0	0.0001	0	0	0	0.0036	0	0.0006	0	0	0	0
9_84	9	84	PBS Control	1	PBS	Indochina	IV	7367	0.0402	0.0003	0.0003	0.068	0.0004	0.7251	0.0316	0.0003	0.0001	0	0.0448	0.0005	0	0.0007	0	0.0001	0	0.0005	0	0	0	0	0	0	0.0003	0	0	0.0001	0	0	0	0	0.0003	0	0.0005	0	0	0	0	0	0
10_0	10	0	PBS Control	1	PBS	Admixed (Philippines, Indonesia)	I	5263	0.0819	0.4754	0.0314	0.0015	0.0304	0.0008	0.0057	0.0025	0.0258	0.0101	0.0002	0.0044	0.0068	0.0013	0.0002	0.0055	0.0049	0.0163	0	0.0061	0.0023	0.0002	0.0021	0	0.004	0	0.0023	0.0015	0	0	0.0011	0.001	0.0008	0	0.0006	0	0.0008	0	0.0025	0	0
10_1	10	1	PBS Control	1	PBS	Admixed (Philippines, Indonesia)	III	8198	0.7337	0.0006	0.1209	0.0002	0.0168	0.0015	0.0024	0	0.0018	0.0115	0	0.0024	0.0061	0.0028	0.0041	0.0046	0.0074	0	0.0016	0.0005	0.0004	0	0	0	0.0007	0	0.003	0	0	0	0.0123	0.0004	0.0015	0	0.0001	0.0016	0.0005	0.0004	0.0018	0	0
10_2	10	2	PBS Control	1	PBS	Admixed (Philippines, Indonesia)	II	8260	0.1808	0.0007	0.4341	0.0011	0.0299	0.0001	0.009	0.0002	0.0041	0.0063	0	0.0054	0.0058	0.0086	0.0007	0.0113	0.036	0.0001	0.0001	0.0012	0.0005	0.0004	0	0	0.0033	0	0.0044	0.0002	0.0004	0	0.0218	0.0008	0.0001	0	0.0002	0.0018	0	0.0075	0.004	0	0
10_7	10	7	PBS Control	1	PBS	Admixed (Philippines, Indonesia)	I	6074	0.3066	0.2149	0.0514	0.0123	0.0525	0.0002	0.0145	0.0025	0.0183	0.0135	0.0003	0.004	0.0143	0.014	0.0003	0.0128	0.0016	0.0138	0	0.0092	0.0007	0	0	0	0.0133	0	0.0026	0.0077	0	0	0.0069	0.0008	0.0002	0	0.0007	0.002	0.0003	0.0002	0.0013	0	0
10_14	10	14	PBS Control	1	PBS	Admixed (Philippines, Indonesia)	I	6617	0.2352	0.1266	0.1037	0.0227	0.0654	0	0.0066	0.0033	0.0506	0.0166	0.0006	0.0089	0.008	0.0033	0	0.01	0.0054	0.0523	0	0.0036	0.0027	0.0002	0	0	0.0062	0	0.0014	0.0107	0	0	0.0026	0.0008	0	0	0.0009	0.0018	0	0.0005	0.0027	0	0
10_28	10	28	PBS Control	1	PBS	Admixed (Philippines, Indonesia)	III	6870	0.8779	0.0063	0.0026	0.0504	0.0028	0.0016	0.0004	0.0001	0.0009	0	0.0031	0.0009	0	0.0001	0	0.0004	0	0	0.0009	0	0	0.0001	0	0	0	0	0	0.0001	0	0	0	0	0	0.0028	0	0	0.0119	0	0	0	0
10_29	10	29	PBS Control	1	PBS	Admixed (Philippines, Indonesia)	III	7368	0.7537	0.168	0.0016	0.0102	0.0012	0.0011	0.001	0	0.0001	0.0039	0.0111	0.0003	0.001	0.0039	0	0.0019	0	0.0001	0.0001	0.0003	0	0.0003	0	0	0.0003	0	0.0001	0	0	0	0	0	0	0.0004	0.0001	0.0003	0.0052	0.0001	0	0	0
10_30	10	30	PBS Control	1	PBS	Admixed (Philippines, Indonesia)	III	7065	0.5953	0.3648	0.0004	0.0057	0.0001	0.0017	0	0	0	0.001	0.0007	0	0.0003	0	0.0001	0.0001	0	0	0.0174	0	0	0	0	0	0	0	0	0	0	0	0	0	0.0001	0.0001	0	0	0.0006	0	0	0	0
10_31	10	31	PBS Control	1	PBS	Admixed (Philippines, Indonesia)	III	6888	0.7963	0.064	0.0003	0.0562	0.0001	0.018	0.0025	0	0.0007	0.0007	0.0057	0.0012	0	0.0009	0.0012	0.0001	0	0	0	0	0.0001	0	0	0	0.0001	0	0	0	0	0	0	0	0	0.0045	0.0012	0	0.0126	0.0001	0	0	0
10_32	10	32	PBS Control	1	PBS	Admixed (Philippines, Indonesia)	III	9196	0.6004	0.0139	0.0994	0.0098	0.0091	0.0716	0.0023	0.0011	0.0035	0.005	0.0012	0.0016	0.0038	0.0012	0.0001	0.0014	0.0005	0.0008	0.0014	0.0016	0.0015	0	0	0	0.0012	0	0.0001	0.0004	0.0003	0	0.0004	0	0	0.0005	0.0003	0.0012	0.0002	0.0004	0.0004	0	0
10_35	10	35	PBS Control	1	PBS	Admixed (Philippines, Indonesia)	IV	5703	0.0165	0.0009	0.003	0.1208	0.0209	0.4875	0.0096	0.0089	0.0047	0	0.0025	0.0377	0	0.0028	0.0172	0.0019	0	0.0074	0	0.0007	0.0002	0.0002	0	0	0.0005	0	0.0002	0.003	0	0	0	0	0.0005	0.1252	0	0	0.0082	0	0	0	0
10_56	10	56	PBS Control	1	PBS	Admixed (Philippines, Indonesia)	IV	8795	0.0149	0.0018	0.0404	0.1775	0.0345	0.2596	0.0024	0.0325	0.0216	0.0002	0.0052	0.0157	0.0005	0.0006	0.002	0.0017	0.0011	0.0224	0.0002	0.0015	0.0025	0.0025	0	0	0.0006	0	0	0.0042	0	0	0.0008	0.0001	0.0001	0	0.0014	0.0002	0.003	0.003	0.0048	0	0
10_57	10	57	PBS Control	1	PBS	Admixed (Philippines, Indonesia)	IV	6938	0.528	0.0197	0.1476	0.0236	0.0007	0.2357	0.0003	0.0009	0.0001	0.0043	0.0003	0	0.0007	0	0.0033	0.0001	0	0	0.0006	0.0003	0.0006	0.0001	0	0	0.0001	0	0.0001	0.0001	0	0	0	0	0	0	0.0003	0.0001	0.0003	0	0.0003	0	0
10_58	10	58	PBS Control	1	PBS	Admixed (Philippines, Indonesia)	IV	4880	0.0818	0.0006	0.2285	0.0994	0.0201	0.0387	0.0039	0.0221	0.0158	0.0023	0.0002	0.0291	0.0008	0.0014	0	0.0002	0.0002	0.0027	0	0.001	0.051	0.0162	0.0002	0	0.0004	0	0	0.0029	0	0	0.0082	0.0307	0	0	0.0018	0.0008	0	0.0035	0.0037	0	0
10_59	10	59	PBS Control	1	PBS	Admixed (Philippines, Indonesia)	IV	3324	0.0782	0	0.0193	0.0087	0.034	0.1053	0.0009	0.0211	0.0205	0	0	0.0009	0.0006	0	0.0009	0	0	0.0087	0	0.0024	0.0156	0.0006	0	0	0	0.0529	0	0.0015	0	0	0	0	0.0009	0	0.0018	0	0	0.0153	0.0024	0	0
10_60	10	60	PBS Control	1	PBS	Admixed (Philippines, Indonesia)	IV	6300	0.0044	0.0024	0.1025	0.0283	0.0483	0.3749	0.0017	0.0257	0.0117	0.0006	0	0.0019	0.0019	0.0006	0.0016	0.0006	0	0.0063	0	0.0008	0.0033	0.0006	0	0	0	0	0	0.0017	0	0	0.0017	0	0.0016	0.039	0.0022	0.0002	0.0005	0.0029	0.0132	0.0665	0
10_63	10	63	PBS Control	1	PBS	Admixed (Philippines, Indonesia)	II	5990	0.0374	0.0037	0.4109	0.0748	0.0376	0.0222	0.0182	0.0093	0.0092	0.0002	0.0033	0.0055	0.0007	0.0013	0.005	0.0012	0	0.0564	0.0008	0	0.0095	0	0	0	0.0017	0	0.0002	0.0098	0	0	0.0007	0	0	0	0.0017	0	0.0053	0.0027	0.007	0	0
10_70	10	70	PBS Control	1	PBS	Admixed (Philippines, Indonesia)	IV	7296	0.0939	0.0005	0	0.0048	0.0197	0.847	0.0008	0.0005	0.0003	0	0.0003	0.0019	0	0.0008	0	0	0	0.0004	0.0007	0	0	0	0.001	0	0	0	0	0.003	0	0	0	0	0.0029	0	0.0001	0	0.0001	0	0	0	0
10_84	10	84	PBS Control	1	PBS	Admixed (Philippines, Indonesia)	IV	8010	0.0386	0	0.0303	0.3605	0.0046	0.3305	0.003	0.007	0.0016	0.0007	0.0085	0.0066	0.0001	0.0082	0	0.0007	0.0001	0.0095	0.0017	0.0001	0.0002	0	0	0	0.0001	0	0	0.0005	0.0002	0	0.0001	0	0	0	0.0007	0.0001	0.0055	0	0.0009	0	0
11_0	11	0	PBS Control	1	PBS	Admixed (Philippines, Indonesia)	I	7587	0.2333	0.5677	0.0265	0.0003	0.0165	0	0.0179	0.0018	0.0128	0.0066	0.0007	0.0092	0.002	0.0014	0	0.0018	0.0009	0.0063	0	0.0046	0.0005	0.0004	0	0	0.0018	0	0.0005	0.0004	0	0	0.0007	0.0014	0.0001	0	0.0005	0	0.0001	0	0.0017	0	0
11_1	11	1	PBS Control	1	PBS	Admixed (Philippines, Indonesia)	I	3607	0.4749	0.4136	0.0238	0.0036	0.0075	0	0.0064	0.0019	0.0033	0.0042	0.0003	0.0011	0.0075	0.0022	0.0006	0.0017	0.0011	0	0.0003	0.0014	0.0003	0.0003	0	0	0.0042	0	0.0008	0	0	0	0	0.0006	0	0	0.0003	0.0003	0	0	0.0003	0	0
11_2	11	2	PBS Control	1	PBS	Admixed (Philippines, Indonesia)	I	5792	0.5242	0.25	0.1324	0.001	0.0129	0	0.006	0.0005	0.0036	0.0067	0.0002	0	0.0033	0.0005	0	0.0047	0.0024	0	0.0005	0.0041	0.0002	0.0009	0	0	0.0026	0	0.0029	0	0	0	0.0002	0.0002	0.0003	0	0.0003	0.0005	0	0.0002	0.0002	0	0
11_7	11	7	PBS Control	1	PBS	Admixed (Philippines, Indonesia)	I	4422	0.3894	0.5669	0.0007	0.0068	0.0032	0	0.0045	0	0	0.0025	0.0018	0	0.0036	0	0	0.0027	0.0002	0	0	0.0014	0.0005	0	0	0	0.0014	0	0.0011	0	0	0	0.0002	0.0011	0	0	0.0002	0.0005	0	0	0	0	0
11_14	11	14	PBS Control	1	PBS	Admixed (Philippines, Indonesia)	III	5287	0.8687	0.0844	0.0059	0.0011	0.0032	0.0009	0.0015	0.0002	0	0.003	0	0.0002	0.0028	0.0015	0	0.0028	0.0015	0	0	0.0023	0	0	0	0	0.0009	0	0.0025	0	0	0	0.0002	0.0008	0	0	0.0017	0.0002	0	0.0002	0	0	0
11_28	11	28	PBS Control	1	PBS	Admixed (Philippines, Indonesia)	III	6678	0.2668	0.0112	0.0085	0.4939	0.0094	0.0052	0.0027	0.0082	0.0021	0.0004	0.0154	0.0013	0	0.0004	0.0016	0.001	0.0001	0.0007	0.01	0	0.0033	0.0001	0	0	0	0	0	0	0	0	0.0001	0	0	0.0127	0	0.0001	0.0036	0	0.0006	0	0
11_29	11	29	PBS Control	1	PBS	Admixed (Philippines, Indonesia)	III	6033	0.3648	0.2093	0.0053	0.2307	0.0013	0.0076	0.0017	0.0005	0.0003	0.0282	0.005	0.0007	0.0106	0.0058	0.0507	0.0027	0	0.0002	0.0008	0.0002	0.0008	0.0003	0	0	0	0	0.0002	0	0	0	0	0.0002	0	0.0017	0.0005	0.0141	0.0025	0	0	0	0
11_30	11	30	PBS Control	1	PBS	Admixed (Philippines, Indonesia)	III	4037	0.211	0.0042	0.0198	0.2891	0.0057	0.003	0.0379	0.0005	0.0025	0.0017	0.002	0.0002	0	0.0054	0.0523	0.001	0.0012	0.0002	0.0121	0	0.0005	0.0002	0	0	0.0012	0	0.0002	0.0005	0	0	0.0025	0.001	0.0002	0.2388	0	0	0	0	0	0	0
11_31	11	31	PBS Control	1	PBS	Admixed (Philippines, Indonesia)	III	6497	0.4271	0.0008	0.0026	0.4805	0.0031	0.0043	0.0034	0.0048	0.0023	0.0003	0.0011	0.0005	0	0.0032	0.0005	0	0	0.0002	0.0002	0	0.0002	0	0	0	0	0	0.0002	0.0002	0	0	0	0	0	0.0006	0	0	0.0006	0	0	0	0
11_32	11	32	PBS Control	1	PBS	Admixed (Philippines, Indonesia)	III	8714	0.7091	0.0896	0.0008	0.1199	0.0026	0.0158	0.0036	0.0039	0.0021	0.002	0.0022	0.0031	0.0015	0.0005	0.0008	0.0008	0	0.0002	0.0005	0	0.0001	0.0001	0	0	0.0003	0	0.0001	0.0002	0	0	0	0	0	0.0003	0	0	0.0002	0	0	0	0
11_35	11	35	PBS Control	1	PBS	Admixed (Philippines, Indonesia)	I	11628	0.1372	0.1584	0.0153	0.0362	0.0597	0.0049	0.0463	0.0249	0.1265	0.0071	0.0008	0.0047	0.0033	0.0005	0.0053	0.0015	0	0.0072	0.0052	0.0013	0.0189	0	0	0	0.0004	0	0.0003	0.0046	0	0	0.0002	0	0.0002	0.0003	0.0007	0.0007	0.0017	0.0001	0.0001	0	0
11_56	11	56	PBS Control	1	PBS	Admixed (Philippines, Indonesia)	I	7754	0.24	0.3772	0.0401	0.1744	0.0017	0.0308	0.0063	0.012	0.0001	0.0035	0.0101	0.0009	0.001	0.0005	0.0001	0.0015	0	0	0.0019	0.0003	0.0004	0	0	0	0.0001	0	0.0001	0.0001	0	0	0	0	0	0	0.0043	0.0003	0.0054	0.0001	0.0001	0	0
11_57	11	57	PBS Control	1	PBS	Admixed (Philippines, Indonesia)	I	8725	0.2253	0.1266	0.0758	0.0155	0.0092	0.0001	0.1371	0.1576	0.0015	0.0081	0.0008	0.003	0.0029	0.0002	0.0005	0.0002	0	0.0008	0	0.0003	0.0063	0.0002	0	0.0001	0.0001	0	0	0.0006	0	0	0.0001	0	0	0	0.0045	0.0011	0.0006	0.0001	0.0042	0	0
11_58	11	58	PBS Control	1	PBS	Admixed (Philippines, Indonesia)	I	6398	0.1597	0.2691	0.1691	0.0117	0.0086	0.0039	0.0978	0.1189	0.0011	0.0022	0	0.0014	0.0028	0.0003	0	0	0.0003	0.0005	0.0005	0.0008	0.0047	0.0009	0	0	0	0	0.0002	0.003	0	0	0	0	0	0	0.0016	0.0005	0.0005	0.0011	0.0033	0	0
11_59	11	59	PBS Control	1	PBS	Admixed (Philippines, Indonesia)	III	5968	0.4584	0.0603	0.0146	0.0044	0.0008	0.2021	0.0509	0.0131	0.0003	0.0034	0	0	0.0017	0	0.0543	0.0003	0	0.0002	0.0002	0.0005	0.0007	0	0	0	0	0	0	0.0023	0	0	0	0	0.0049	0	0.0023	0	0	0	0	0.0263	0
11_60	11	60	PBS Control	1	PBS	Admixed (Philippines, Indonesia)	I	6564	0.301	0.0727	0.1149	0.0559	0.0072	0.0468	0.0424	0.0955	0.0015	0.009	0.0005	0.0003	0.007	0.0027	0.0006	0.0006	0.0002	0.0017	0.0008	0.0008	0.0009	0.0008	0	0	0	0	0	0.0053	0	0	0	0	0	0	0.0052	0.0005	0.0011	0.0014	0.0008	0	0.0002
11_63	11	63	PBS Control	1	PBS	Admixed (Philippines, Indonesia)	I	8487	0.3353	0.5413	0.004	0.0415	0.0005	0.0027	0.0051	0.0197	0.0006	0.0025	0.0049	0.0007	0.0015	0.0002	0.0001	0	0	0.0001	0.0002	0	0.0002	0.0001	0	0	0	0	0	0	0	0	0	0	0	0	0.0031	0	0.0002	0	0.0007	0	0
11_70	11	70	PBS Control	1	PBS	Admixed (Philippines, Indonesia)	I	8091	0.1853	0.1843	0.0414	0.0241	0.0062	0.0263	0.0823	0.169	0.002	0.0136	0.0001	0.0033	0.0046	0.0012	0.004	0.0009	0.0001	0.0012	0.0027	0.0001	0.0012	0.0021	0	0	0.0004	0	0	0.0005	0	0	0.0007	0	0	0	0.0142	0.0026	0.0015	0.0004	0.0027	0	0
11_84	11	84	PBS Control	1	PBS	Admixed (Philippines, Indonesia)	IV	7433	0.1893	0.0562	0.1193	0.5173	0.0032	0.0001	0.0013	0.0258	0	0.0183	0.0013	0.0008	0.0004	0.0009	0.0003	0.0001	0	0.0003	0.0089	0.0003	0	0	0	0	0.0001	0	0.0001	0.0003	0	0	0.0003	0	0	0	0.0017	0	0.0024	0.0001	0	0	0
12_0	12	0	PBS Control	1	PBS	Indochina	I	7241	0.5828	0.3422	0.004	0.0033	0.0043	0	0.0051	0.0003	0.0012	0.0088	0.0001	0.0003	0.0044	0.0026	0.0001	0.005	0	0.0029	0.0019	0.0026	0.0003	0.0003	0	0	0.0018	0	0.0014	0.0004	0	0	0.0007	0.001	0.0003	0	0.0008	0	0.0001	0	0	0	0
12_1	12	1	PBS Control	1	PBS	Indochina	I	6991	0.587	0.3413	0.0064	0.0019	0.0044	0	0.0024	0.0004	0.0011	0.0087	0	0.0001	0.0064	0.0017	0	0.0031	0.0001	0.0016	0.003	0.0021	0.0007	0	0	0	0.0029	0	0.0017	0	0	0	0.0003	0.001	0	0	0.0007	0	0	0	0.0001	0	0
12_2	12	2	PBS Control	1	PBS	Indochina	I	6429	0.606	0.2324	0.0204	0.0012	0.0109	0.0002	0.0135	0.004	0.0042	0.0065	0	0.0025	0.0075	0.002	0.0003	0.004	0.0006	0.0051	0.0008	0.0016	0.0002	0	0	0	0.0053	0	0.0023	0.0025	0	0	0.0006	0.0003	0	0	0.0006	0	0	0.0002	0	0	0
12_7	12	7	PBS Control	1	PBS	Indochina	III	6813	0.6938	0.0835	0.0038	0.004	0.0119	0	0.009	0.001	0.0013	0.0251	0.0004	0.0007	0.0363	0.0117	0.0081	0.0069	0.0012	0.0038	0.0001	0.0038	0.0012	0.0006	0	0	0.0043	0	0.0044	0.0012	0	0	0.0015	0.0018	0	0	0.0007	0.0053	0	0.0001	0	0	0
12_14	12	14	PBS Control	1	PBS	Indochina	I	2495	0.3627	0.5287	0.0168	0.0048	0.0052	0	0.0096	0.0004	0.0024	0.006	0	0.0004	0.0056	0.0064	0	0.0032	0.0004	0.006	0.0012	0.0016	0.0008	0	0	0	0.0008	0	0.0008	0.0024	0	0	0	0.0016	0	0	0	0	0	0	0.0004	0	0
12_28	12	28	PBS Control	1	PBS	Indochina	III	8499	0.7864	0.0352	0.0029	0.0953	0.0025	0.0156	0.0026	0.0026	0.0006	0	0.0052	0.0025	0.0006	0.0012	0.0008	0.0011	0.0001	0.0011	0.0006	0	0	0	0	0	0.0002	0	0.0001	0.0002	0	0	0	0	0	0.0036	0.0001	0	0.0009	0	0	0	0
12_29	12	29	PBS Control	1	PBS	Indochina	III	7990	0.8542	0.0039	0.0005	0.0314	0.0039	0.0046	0.005	0.002	0.0004	0	0.0004	0.014	0	0.0008	0.0001	0.0035	0	0.0003	0.0003	0	0	0	0	0	0	0	0	0	0	0	0.0001	0	0.0004	0.0005	0	0	0.0013	0.0001	0	0	0
12_30	12	30	PBS Control	1	PBS	Indochina	III	4283	0.8475	0.0021	0.0005	0.0633	0.0019	0.0075	0.0009	0.0016	0.0028	0	0.0037	0.0068	0	0.0002	0.0002	0	0	0.0021	0.0002	0	0.0002	0	0	0	0.0002	0	0	0	0	0	0	0	0	0.0005	0	0	0.0007	0	0.0002	0	0
12_31	12	31	PBS Control	1	PBS	Indochina	III	7781	0.3885	0.2754	0.006	0.1297	0.0015	0.0105	0.0013	0.0021	0.0009	0.0001	0.0415	0.0027	0.0003	0.0005	0.0067	0.0013	0	0.0005	0.0096	0	0.0001	0	0	0	0	0	0	0	0	0	0	0.0001	0.0001	0.0067	0.0003	0	0.0049	0	0.0004	0	0
12_32	12	32	PBS Control	1	PBS	Indochina	III	10473	0.6332	0.0435	0.0254	0.0714	0.0065	0.0462	0.0017	0.0108	0.0029	0	0.0072	0.0013	0.0008	0.0001	0.0066	0.0021	0	0.003	0.0024	0.0001	0.0002	0.0002	0	0	0	0	0.0001	0.0003	0	0	0.0003	0	0.0007	0.0048	0.0001	0	0.0003	0.0002	0.0025	0	0.0001
12_35	12	35	PBS Control	1	PBS	Indochina	IV	7670	0.0714	0.1991	0.0039	0.0688	0.0035	0.4164	0.0064	0.002	0.0007	0.0003	0.0016	0.0081	0	0.0005	0.0776	0.0005	0	0.0072	0.0003	0.0004	0.0001	0.0003	0	0	0.0005	0	0.0003	0.0003	0	0	0	0	0.0004	0.0016	0.0012	0	0.0043	0	0.0003	0	0
12_56	12	56	PBS Control	1	PBS	Indochina	I	7393	0.2103	0.6645	0.0031	0.016	0.0018	0.01	0.0015	0.0096	0.0005	0.0023	0.0027	0.0019	0.0023	0.0003	0.0005	0.0001	0	0.0003	0	0	0	0.0001	0	0	0.0003	0	0	0.0005	0	0	0	0	0	0	0.0005	0	0.0004	0.0004	0.0003	0	0
12_57	12	57	PBS Control	1	PBS	Indochina	I	6003	0.1929	0.6314	0.0142	0.0162	0.0077	0.0032	0.0023	0.0267	0.0015	0.0012	0.0008	0.0218	0.0018	0	0.0022	0.0007	0	0.0007	0.0013	0	0.0055	0.0007	0	0	0.0003	0.0002	0.0003	0.004	0	0	0	0.0005	0	0	0.0002	0.0013	0.0012	0.0003	0.0003	0	0
12_58	12	58	PBS Control	1	PBS	Indochina	I	6891	0.2589	0.1641	0.0225	0.0209	0.011	0.1019	0.0116	0.1109	0.0036	0.0015	0.0006	0.0013	0.0006	0	0.0337	0.0001	0	0.0038	0.0013	0	0.0007	0.0006	0	0	0.0001	0	0.0003	0.0028	0	0.0001	0	0	0.0003	0	0.0017	0.0004	0.0015	0.0023	0.0009	0	0
12_59	12	59	PBS Control	1	PBS	Indochina	I	6615	0.207	0.486	0.005	0.0142	0.0033	0.1813	0.002	0.0212	0.0036	0.0003	0.0011	0.0062	0.0008	0	0.0065	0	0	0.0018	0	0	0.0002	0	0	0	0	0	0.0003	0.0035	0	0.0003	0.0002	0	0.0032	0	0.0005	0	0	0.0002	0	0	0
12_60	12	60	PBS Control	1	PBS	Indochina	IV	6961	0.2741	0.1895	0.017	0.0463	0.0085	0.1697	0.0089	0.0362	0.0022	0.0006	0.0017	0.0257	0.0017	0.001	0.0124	0.0004	0	0.0042	0.0003	0.0001	0.0004	0.0011	0	0	0.0003	0	0	0.004	0	0	0	0.0001	0.0006	0	0.0006	0	0.0034	0	0.0007	0	0
12_63	12	63	PBS Control	1	PBS	Indochina	I	5245	0.2549	0.4591	0.0002	0.0524	0.0008	0.1506	0.0004	0.0053	0.0002	0.0002	0.0368	0.0021	0.0002	0	0	0.0004	0.0002	0	0.004	0	0	0	0	0	0	0	0	0	0	0	0	0	0	0	0.0013	0	0.0032	0	0	0	0
12_84	12	84	PBS Control	1	PBS	Indochina	I	5696	0.2372	0.1383	0.0916	0.1698	0.0088	0.0058	0.0021	0.0941	0.0037	0.0033	0.0011	0.0179	0.0002	0.0012	0.0019	0.0005	0	0.017	0.0005	0	0.0005	0.0002	0	0	0	0	0.0002	0.0023	0	0	0.0004	0	0	0	0.0033	0	0.0019	0.0007	0.0004	0	0
20_0	20	0	PBS Control 2	2	CVD1256	Mauritius	II	9119	0.0114	0.0002	0.1866	0.0016	0.1205	0.0001	0.0373	0.0004	0.0194	0.0357	0.0098	0.0114	0.0544	0.0368	0.0003	0.0167	0.0265	0.0025	0	0.0109	0.0015	0	0	0	0.0072	0	0.0084	0.0007	0	0	0.0019	0.0281	0.0007	0	0.0032	0.0111	0.0004	0.0022	0.0022	0	0
20_2	20	2	PBS Control 2	2	CVD1256	Mauritius	II	8300	0.0122	0.0213	0.1095	0.003	0.1546	0	0.0312	0.0004	0.0202	0.0428	0.0034	0.0082	0.0701	0.0537	0	0.0242	0.0163	0.0011	0	0.009	0.0024	0	0	0	0.0178	0	0.0073	0.0006	0.0002	0	0.0042	0.0319	0.0001	0	0.0035	0.0084	0.0007	0.0018	0.0011	0	0
20_4	20	4	PBS Control 2	2	CVD1256	Mauritius	II	11172	0.0023	0.0225	0.1442	0.0066	0.0989	0.0005	0.0205	0.0076	0.0291	0.0354	0.0024	0.0333	0.0163	0.0296	0.0004	0.016	0.0443	0.0018	0.0003	0.017	0.0021	0	0	0	0.0057	0	0.004	0.0029	0	0	0.0021	0.0071	0.0003	0	0.0018	0.0013	0.0005	0.0011	0.0018	0	0
20_7	20	7	PBS Control 2	2	CVD1256	Mauritius	II	8786	0.001	0.0124	0.0126	0.0108	0.0645	0.0635	0.0178	0.0028	0.0082	0.0118	0.0105	0.0117	0.0454	0.0246	0.0016	0.0186	0.0046	0.0035	0.0106	0.0066	0.0014	0	0	0	0.0164	0	0.0031	0.0003	0.0766	0	0.0009	0.013	0.0711	0	0.0026	0.0023	0.0007	0.0005	0.0005	0	0
20_10	20	10	PBS Control 2	2	CVD1256	Mauritius	II	8466	0	0.0001	0.0276	0.0073	0.5274	0	0.0294	0.0021	0.0245	0.0047	0.0014	0.0213	0.0022	0.0008	0	0.0024	0.0017	0.0146	0	0.0012	0.0011	0	0	0	0.0013	0	0.0008	0.0005	0	0	0.0009	0.0006	0	0	0.0001	0.0001	0	0.0009	0	0	0
20_28	20	28	PBS Control 2	2	CVD1256	Mauritius	II	11246	0.0004	0.0003	0.0251	0.0115	0.1494	0.0016	0.0424	0.0023	0.0231	0.0124	0.0165	0.0195	0.0252	0.0301	0.0025	0.0148	0.0028	0.0062	0.001	0.013	0.0015	0.0002	0.0012	0	0.0182	0	0.015	0.0018	0.0106	0	0.0014	0.0118	0.0143	0.0007	0.0009	0.0073	0.0009	0.0009	0.0007	0	0
20_30	20	30	PBS Control 2	2	CVD1256	Mauritius	II	9335	0.0032	0.0004	0.0108	0.0002	0.3613	0	0.0438	0.003	0.0664	0.0009	0.0003	0.0081	0.0005	0.0007	0.0001	0.001	0.0013	0.0108	0	0.0005	0.0005	0	0	0	0.0002	0	0.0002	0.0029	0	0	0.0002	0.0003	0	0	0	0.0009	0	0.0002	0.0002	0	0
20_final	20	35, finala	PBS Control 2	2	CVD1256	Mauritius	II	8111	0.0065	0.0005	0.1868	0.0014	0.1085	0.0002	0.0321	0.0023	0.0176	0.0244	0.0286	0.0359	0.0277	0.0166	0	0.0158	0.0002	0.0054	0.0001	0.0023	0.0014	0.0001	0	0	0.0118	0	0.0091	0.0057	0.0004	0	0.0049	0.0055	0	0	0.0015	0.0293	0	0.0064	0.0014	0	0
21_0	21	0	PBS Control 2	2	CVD1256	Mauritius	II	10202	0.0033	0.0403	0.0578	0.0121	0.074	0.0065	0.0237	0.0022	0.0605	0.0305	0.0056	0.0173	0.0148	0.0222	0.057	0.0103	0.0096	0.0136	0.0045	0.0179	0.0042	0.0001	0	0	0.0082	0	0.006	0.0054	0.0007	0	0.0017	0.0048	0.0034	0	0.0051	0.0118	0.0007	0.0011	0.0004	0	0
21_2	21	2	PBS Control 2	2	CVD1256	Mauritius	II	9351	0.056	0.0084	0.2061	0.006	0.0461	0.0003	0.0216	0.004	0.0194	0.0628	0.0007	0.0189	0.0271	0.0661	0.0006	0.0136	0.0306	0.001	0.0002	0.0154	0.001	0.0003	0	0	0.0109	0	0.0073	0.0009	0.0006	0	0.0034	0.0136	0	0	0.0031	0.0165	0.0016	0.0007	0.0019	0	0
21_4	21	4	PBS Control 2	2	CVD1256	Mauritius	II	8145	0.0002	0.0016	0.0339	0.006	0.1131	0.0002	0.0296	0.0014	0.0156	0.0359	0.0374	0.0131	0.0777	0.0705	0.0001	0.0126	0.0092	0.0017	0.0006	0.0108	0.0036	0	0	0	0.0115	0	0.0101	0.0001	0.0427	0	0.0018	0.0141	0	0.0005	0.0036	0.0023	0.0002	0.0009	0.0023	0	0
21_7	21	7	PBS Control 2	2	CVD1256	Mauritius	II	7197	0	0.0001	0.2614	0.0217	0.3922	0	0.0031	0.0018	0.065	0.0019	0.0001	0.0201	0.0006	0.0024	0	0.0011	0.009	0.0036	0.0001	0.0013	0.0007	0	0	0	0.0001	0	0	0.0011	0	0	0.0025	0.0004	0	0	0	0	0.0004	0.0017	0	0	0
21_10	21	10	PBS Control 2	2	CVD1256	Mauritius	I	9027	0.0193	0.3702	0.0429	0.0032	0.1113	0.0002	0.0122	0.0014	0.0216	0.0235	0.0136	0.0316	0.0089	0.0133	0.0006	0.0088	0.0113	0.0039	0.0014	0.0082	0.0014	0	0	0	0.0033	0	0.0031	0.0013	0	0	0.0017	0.0041	0.0002	0	0.0007	0.0014	0.0006	0.0006	0.0003	0	0
21_28	21	28	PBS Control 2	2	CVD1256	Mauritius	II	11141	0.0032	0.0002	0.0699	0.0045	0.0378	0.0014	0.009	0.0005	0.008	0.14	0.0015	0.0058	0.0671	0.1272	0.0014	0.0428	0.0083	0.0004	0.0005	0.0081	0.0013	0.0001	0	0	0.0146	0	0.0094	0.0009	0.0083	0	0.0039	0.018	0.0006	0	0.0081	0.0105	0.0011	0.006	0.0005	0	0
21_30	21	30	PBS Control 2	2	CVD1256	Mauritius	II	8813	0.006	0	0.0252	0.0218	0.1342	0	0.0495	0.0085	0.05	0.0158	0.0091	0.0525	0.0022	0.0166	0.0005	0.0104	0.0203	0.0102	0.0001	0.0057	0.0017	0	0	0	0.0104	0	0.0032	0.0053	0	0	0.0005	0.0039	0	0	0.0002	0.0014	0.0008	0.0058	0.001	0	0
21_final	21	39, finala	PBS Control 2	2	CVD1256	Mauritius	II	6464	0.0048	0	0.0996	0.0135	0.1239	0	0.0562	0.0031	0.0153	0.0478	0.0082	0.0306	0.0314	0.0558	0.0005	0.0186	0.0792	0.002	0.0046	0.0048	0.002	0.0002	0	0	0.006	0	0.0046	0.0015	0	0	0.0096	0.0056	0	0	0.0006	0.0099	0	0.0014	0.0006	0	0
22_0	22	0	PBS Control 2	2	CVD1256	Mauritius	I	8977	0.2384	0.017	0.0691	0.0237	0.159	0	0.0109	0.0061	0.0372	0.0114	0.0008	0.0476	0.0124	0.0029	0.0066	0.0035	0.0021	0.0163	0.0029	0.0041	0.0023	0	0	0	0.0022	0	0.0016	0.0063	0	0	0.0014	0.0019	0.0013	0	0.0002	0.0023	0.0004	0.0065	0.0002	0	0
22_2	22	2	PBS Control 2	2	CVD1256	Mauritius	I	8737	0.3663	0.0135	0.099	0.0003	0.094	0	0.0278	0.0147	0.0294	0.0132	0	0.0077	0.0058	0.0068	0	0.0052	0.0081	0.0027	0.0006	0.0047	0.0018	0.0001	0	0	0.0035	0	0.0015	0.0033	0	0	0.0019	0.0054	0	0	0	0.0026	0.0002	0.0034	0.0005	0	0
22_4	22	4	PBS Control 2	2	CVD1256	Mauritius	II	7994	0.002	0.0008	0.0824	0.001	0.2621	0	0.0288	0.0169	0.0618	0.0101	0.0001	0.0363	0.0088	0.0033	0	0.0059	0.0118	0.0143	0	0.0036	0.0023	0.0001	0	0	0.0041	0	0.0014	0.0165	0	0	0.0018	0.0009	0	0	0	0.0018	0.0005	0.0015	0.0003	0	0
22_7	22	7	PBS Control 2	2	CVD1256	Mauritius	II	5290	0.0006	0.0006	0.049	0.0002	0.3363	0	0.0057	0.0013	0.0348	0.0074	0	0.0864	0.0062	0.0009	0	0.0009	0.0051	0.0191	0	0.0011	0.0074	0	0	0	0.0009	0	0.0019	0.0049	0	0	0.0013	0.0008	0	0	0	0	0	0.0002	0	0	0
22_10	22	10	PBS Control 2	2	CVD1256	Mauritius	II	7444	0.0098	0.0003	0.2617	0.0103	0.1448	0	0.0055	0	0.0278	0.0334	0.0003	0.0204	0.0289	0.0056	0.0003	0.0052	0.0027	0.0005	0	0.0019	0.0024	0	0	0	0.0026	0	0.0034	0.002	0	0	0.0091	0.0038	0	0	0.0001	0.0032	0.0005	0	0.0001	0	0
22_28	22	28	PBS Control 2	2	CVD1256	Mauritius	II	8544	0.0004	0	0.4268	0.0037	0.1561	0	0.0139	0.0006	0.0603	0.0071	0.0001	0.0973	0.005	0.0006	0	0.0057	0.0255	0.003	0	0.0005	0.0026	0.0002	0	0	0	0	0.0011	0.0019	0	0	0.006	0.0019	0	0	0.0002	0.0002	0	0.0019	0.0001	0	0
22_30	22	30	PBS Control 2	2	CVD1256	Mauritius	I	9460	0.3051	0.0011	0.0272	0.0021	0.0401	0	0.0115	0	0.0053	0.048	0.0004	0.0018	0.0468	0.0292	0.0003	0.0285	0.0071	0.0002	0.0004	0.0197	0.0014	0	0	0	0.0077	0	0.0201	0.0002	0.0022	0	0.0008	0.0378	0	0	0.0043	0.034	0.0006	0.0005	0.0002	0	0
22_final	22	45, finala	PBS Control 2	2	CVD1256	Mauritius	II	7037	0.0003	0.0001	0.3268	0.0036	0.1511	0	0.0043	0.0009	0.0099	0.0024	0	0.1856	0.0014	0.0023	0	0.0048	0.0242	0.0026	0	0.0003	0.0007	0	0	0	0	0	0.0003	0.0063	0	0	0.0055	0.0027	0	0	0.0004	0.0001	0.0001	0.0007	0.0016	0	0
23_0	23	0	PBS Control 2	2	CVD1256	Mauritius	I	8898	0.0276	0.7653	0.0025	0.0055	0.0025	0.0004	0.0008	0.0001	0.0006	0.0163	0.0134	0.0004	0.0136	0.0161	0.0088	0.0043	0.0003	0.0008	0.033	0.0115	0	0	0	0	0.0015	0	0.0013	0.0001	0	0	0	0.0013	0.0063	0	0.0009	0.0129	0.0004	0.0002	0	0	0
23_2	23	2	PBS Control 2	2	CVD1256	Mauritius	I	9492	0.319	0.5258	0.0014	0.008	0.0082	0	0.0023	0.0004	0.0017	0.0123	0.0045	0.0027	0.0013	0.0105	0	0.0024	0.0006	0.0004	0.0011	0.0146	0	0	0	0	0.0019	0	0.0035	0	0.0001	0	0	0.0018	0.0002	0	0.0014	0.0031	0.0002	0.0001	0	0	0
23_4	23	4	PBS Control 2	2	CVD1256	Mauritius	I	11335	0.0222	0.3293	0.0399	0.0058	0.064	0.0001	0.0411	0.0093	0.0261	0.004	0.0286	0.0059	0.0003	0.0034	0.0002	0.0014	0.0135	0.0069	0	0.0064	0.0004	0	0	0	0.003	0	0.0014	0.0026	0	0	0.0001	0.0001	0.0001	0	0.0002	0.0015	0.0002	0.0053	0.0008	0	0
23_7	23	7	PBS Control 2	2	CVD1256	Mauritius	I	8533	0.2237	0.0796	0.038	0.0227	0.0544	0.0042	0.0476	0.0053	0.0239	0.0097	0.0207	0.0046	0.0004	0.0071	0.0018	0.0068	0.0525	0.0015	0.0034	0.0045	0.0002	0	0	0	0.0067	0	0.0032	0.0045	0.0176	0	0.0005	0.0002	0.0041	0	0.0006	0.0004	0.0001	0.003	0.0011	0	0
23_10	23	10	PBS Control 2	2	CVD1256	Mauritius	II	9045	0.0676	0.004	0.0132	0.0119	0.5324	0	0.006	0.0007	0.0522	0.0052	0.0128	0.0149	0.0018	0.0014	0.0001	0.0011	0.0112	0.0024	0.0006	0.0049	0.0013	0.0001	0	0	0.0009	0	0.0019	0.0042	0	0	0.0022	0.0004	0	0	0.0006	0	0.0006	0.001	0.0001	0	0
23_28	23	28	PBS Control 2	2	CVD1256	Mauritius	I	9105	0.076	0.0198	0.0058	0.1339	0.0297	0.0003	0.0168	0.0001	0.0116	0.0393	0.0064	0.0024	0.0549	0.0248	0.0015	0.0067	0.0015	0.0002	0.0001	0.019	0.0007	0	0	0	0.0062	0	0.0115	0.0005	0.0051	0	0	0.0048	0.0016	0.0001	0.0054	0.0009	0.0004	0.0003	0	0	0
23_30	23	30	PBS Control 2	2	CVD1256	Mauritius	I	9115	0.2181	0.0149	0.0165	0.0152	0.0794	0	0.1882	0.0012	0.0215	0.011	0.0035	0.0246	0.0018	0.0165	0.0061	0.0066	0.0078	0.0084	0.0025	0.0067	0.0015	0	0	0	0.0064	0	0.0023	0.0022	0.0022	0	0.0004	0.0015	0.0013	0	0.0015	0.0005	0.001	0.003	0.001	0	0
23_final	23	43, finala	PBS Control 2	2	CVD1256	Mauritius	II	9241	0.0525	0.0009	0.0463	0.0811	0.0917	0.0003	0.0677	0.0051	0.0398	0.0052	0.0338	0.0226	0.0005	0.0078	0.0012	0.0036	0.023	0.017	0.0009	0.0066	0.0013	0.0001	0	0	0.0025	0	0.0018	0.0026	0.0013	0	0.0001	0.0011	0.0001	0	0.0001	0.0028	0.0001	0.0015	0.0036	0	0
24_0	24	0	PBS Control 2	2	PBS	Mauritius	II	9549	0.0249	0	0.0165	0.0003	0.4655	0	0.0036	0	0.0177	0.0062	0.0001	0.0703	0.0027	0.0005	0	0.0013	0.0029	0.0012	0	0.0019	0.0006	0.2436	0	0	0.0005	0	0.0003	0.0009	0	0	0.0024	0.0005	0	0	0.0001	0	0.0001	0.0003	0.0003	0	0
24_2	24	2	PBS Control 2	2	PBS	Mauritius	I	9157	0.0017	0.5152	0.0188	0.0014	0.0849	0	0.0441	0.0003	0.0169	0.0227	0.0001	0.0048	0.0114	0.0024	0	0.0055	0.0119	0.0005	0	0.009	0.0009	0.0135	0	0	0.0057	0	0.0031	0.0021	0	0	0.0016	0.0039	0	0	0.0023	0.0005	0.0002	0.0039	0.0009	0	0
24_4	24	4	PBS Control 2	2	PBS	Mauritius	I	9340	0.0162	0.205	0.0082	0.0027	0.05	0	0.0177	0	0.0019	0.0885	0.0065	0.002	0.1112	0.0764	0	0.0254	0.0076	0.0002	0	0.0296	0.0021	0.0171	0	0	0.0137	0	0.0136	0.0004	0	0	0.0063	0.0155	0	0	0.0046	0.0017	0.0005	0.004	0.0001	0	0
24_7	24	7	PBS Control 2	2	PBS	Mauritius	II	11465	0.0007	0.0584	0.0563	0.0084	0.1078	0.0007	0.1181	0.003	0.0352	0.0202	0.0024	0.0122	0.0058	0.0426	0.001	0.008	0.0109	0.0027	0.0005	0.0078	0.0016	0.011	0	0	0.0088	0	0.0046	0.0072	0.0141	0	0.0017	0.0031	0.0003	0	0.0028	0	0.0008	0.0065	0.0016	0	0
24_10	24	10	PBS Control 2	2	PBS	Mauritius	I	9138	0.0428	0.4869	0.0194	0.001	0.0343	0.0002	0.0059	0	0.0028	0.0665	0.0003	0.0034	0.0676	0.0492	0.0015	0.0161	0.0053	0.0001	0.0003	0.0069	0.0009	0.01	0	0	0.0037	0	0.0021	0.0003	0.0035	0	0.0049	0.0078	0.0001	0	0.0023	0.0031	0	0.003	0.0001	0	0
24_28	24	28	PBS Control 2	2	PBS	Mauritius	II	8335	0.0078	0	0.0563	0.0097	0.1074	0	0.1247	0.0004	0.0888	0.0047	0.0023	0.0046	0.0112	0.0136	0.0047	0.015	0.0066	0.002	0.0025	0.0162	0.0008	0.0074	0	0	0.0277	0	0.007	0.003	0.0041	0	0.0028	0.008	0.0001	0	0.0022	0.0011	0.0006	0.0054	0.0012	0	0
24_30	24	30	PBS Control 2	2	PBS	Mauritius	I	8730	0.4734	0.0005	0.0314	0.0081	0.0371	0	0.0472	0.0001	0.0115	0.0239	0	0.0052	0.0532	0.017	0.001	0.0094	0.0042	0.0002	0.0058	0.0055	0.001	0.0054	0	0	0.0073	0	0.0048	0.0007	0.0088	0	0.0066	0.0057	0.0002	0	0.0016	0.0113	0.0002	0.0089	0.0017	0	0
24_final	24	37, finala	PBS Control 2	2	PBS	Mauritius	II	9237	0.0132	0	0.0182	0.0053	0.1172	0.0001	0.0311	0.0026	0.023	0.0365	0.006	0.0234	0.0287	0.0068	0.0133	0.0091	0.0171	0.0004	0.0079	0.0076	0.0021	0.009	0	0	0.0053	0	0.0027	0.0005	0	0	0.0014	0.0084	0.0001	0	0.0013	0.0002	0	0.0052	0.0018	0	0
25_0	25	0	PBS Control 2	2	PBS	Mauritius	I	15070	0.0691	0.6539	0.0032	0.0206	0.0229	0.0007	0.0048	0.0012	0.0086	0.0157	0.0268	0.0023	0.0201	0.0132	0.0002	0.0017	0.0072	0.0036	0.0002	0.0078	0.0022	0.0003	0	0	0.0024	0	0.0035	0.0005	0.0001	0	0.0005	0.0049	0	0	0.0032	0.0017	0.0003	0	0.0002	0	0
25_2	25	2	PBS Control 2	2	PBS	Mauritius	III	9931	0.7547	0.0154	0.0094	0.0022	0.0202	0	0.0039	0.0014	0.0084	0.0121	0.0129	0.003	0.0074	0.0113	0.0001	0.0026	0.0151	0.0015	0.0006	0.0015	0.0006	0	0	0	0.0016	0	0.0035	0.0013	0.0001	0	0.0004	0.0085	0	0	0.0016	0.0013	0.0004	0	0.0003	0	0
25_4	25	4	PBS Control 2	2	PBS	Mauritius	I	10680	0.1174	0.3049	0.0387	0.0079	0.0657	0.0004	0.0216	0.0056	0.0319	0.019	0.0012	0.012	0.0031	0.0131	0	0.0057	0.0278	0.0156	0	0.0017	0.0003	0.0001	0	0	0.0046	0	0.0037	0.0037	0	0	0.0014	0.0009	0	0	0.0014	0.0011	0.0006	0.0001	0.0015	0	0
25_7	25	7	PBS Control 2	2	PBS	Mauritius	I	8955	0.216	0.3862	0.0127	0.0207	0.0655	0.0006	0.0026	0.0064	0.016	0.0102	0.0012	0.0202	0.0036	0.0055	0.0011	0.0034	0.0144	0.0084	0	0.0029	0.0009	0	0	0	0.0029	0	0.003	0.0017	0.0011	0	0.0004	0.0003	0.0006	0	0	0.0006	0.0002	0.0002	0.0007	0	0
25_10	25	10	PBS Control 2	2	PBS	Mauritius	III	9525	0.8393	0.0051	0.005	0.0009	0.0177	0.0001	0.002	0.0018	0.009	0.0045	0	0.0022	0.0007	0.0013	0	0.0013	0.0065	0.005	0.0003	0.0014	0.0003	0	0	0	0.001	0	0.0012	0.0005	0.0004	0	0.0002	0.0005	0	0	0.0003	0	0.0001	0	0.0002	0	0
25_30	25	30	PBS Control 2	2	PBS	Mauritius	III	11544	0.7951	0.0001	0.0025	0.0048	0.0269	0.0001	0.0029	0.001	0.0085	0.0039	0	0.003	0.0006	0.0027	0	0.0019	0.0076	0.0018	0.0002	0.0004	0.0003	0	0	0	0.0024	0	0.002	0.0013	0.0014	0	0.0001	0.0006	0	0	0.0004	0.0003	0.0001	0.0002	0.0003	0	0
25_final	25	49, finala	PBS Control 2	2	PBS	Mauritius	II	8960	0.0359	0.0001	0.0231	0.0471	0.1344	0	0.0147	0.0044	0.0286	0.0077	0.0166	0.0068	0.0035	0.0031	0.006	0.0148	0.014	0.0516	0.0059	0.0212	0.0004	0.0002	0	0	0.0364	0	0.0127	0.0087	0	0	0.0007	0.0004	0.0002	0	0.0035	0.0007	0.0007	0.0001	0.0012	0	0
26_0	26	0	Vaccinated 2	2	CVD1256	Mauritius	I	10402	0.0277	0.2681	0.0143	0.0351	0.0341	0.0353	0.0068	0.0011	0.007	0.0286	0.0029	0.0148	0.0358	0.0028	0.097	0.0056	0.0026	0.0027	0.0158	0.0088	0.0004	0	0.0006	0	0.0031	0	0.0029	0.0018	0.0003	0	0.0002	0.0041	0.1828	0.0002	0.0007	0.0018	0.0001	0	0.0001	0	0
26_2	26	2	Vaccinated 2	2	CVD1256	Mauritius	III	8945	0.5892	0.0039	0.047	0.0046	0.0499	0.0001	0.0274	0.002	0.0179	0.008	0.0004	0.0116	0.0049	0.002	0	0.0013	0.0098	0.0046	0.0004	0.0034	0.0003	0	0	0	0.0012	0	0.0018	0.0028	0.0002	0	0.0013	0.0016	0.0001	0	0.0002	0.0003	0.0002	0.0003	0.0007	0	0
26_4	26	4	Vaccinated 2	2	CVD1256	Mauritius	II	15065	0.0062	0.0011	0.1259	0.0062	0.1103	0	0.1481	0.0049	0.0386	0.0069	0.0003	0.0427	0.0141	0.0033	0.0003	0.0056	0.0204	0.0083	0.0005	0.0028	0.0005	0.0001	0	0	0.0025	0	0.001	0.0074	0	0	0.0025	0.0017	0.0005	0	0.0007	0.0042	0	0.0002	0.0007	0	0
26_7	26	7	Vaccinated 2	2	CVD1256	Mauritius	II	10551	0.0977	0.0002	0.0674	0.02	0.1048	0.0071	0.0803	0.0073	0.0389	0.0066	0.0035	0.022	0.0087	0.0035	0.0027	0.0041	0.047	0.0071	0.0021	0.0047	0.0004	0.0001	0	0	0.0047	0	0.0008	0.0059	0.001	0	0.001	0.0029	0.0184	0	0.0003	0.0021	0.0003	0.0002	0.0012	0	0
26_10	26	10	Vaccinated 2	2	CVD1256	Mauritius	III	10548	0.4855	0.0066	0.0215	0.025	0.0681	0.0007	0.083	0.002	0.0278	0.0153	0.0002	0.0149	0.0038	0.008	0.0003	0.005	0.0125	0.0042	0.0002	0.0021	0.0011	0	0	0	0.0035	0	0.0011	0.0019	0.0004	0	0.0013	0.0026	0	0	0.0002	0.0004	0.0002	0.0005	0.0005	0	0
26_28	26	28	Vaccinated 2	2	CVD1256	Mauritius	II	7858	0.0094	0	0.0542	0.0778	0.1819	0	0.023	0.0018	0.0303	0.0463	0.0005	0.0186	0.0285	0.0117	0.0017	0.0171	0.0267	0.0118	0.0636	0.0141	0.001	0	0	0	0.006	0	0.0052	0.0039	0.0003	0	0.0037	0.0108	0.0024	0	0.0006	0.013	0.0008	0.001	0.001	0	0
26_30	26	30	Vaccinated 2	2	CVD1256	Mauritius	I	16408	0.3104	0.0005	0.0363	0.0606	0.0547	0.0001	0.0613	0.0016	0.0183	0.0296	0.0002	0.0177	0.0072	0.0239	0.0003	0.0073	0.0034	0.0323	0.0009	0.0155	0.0001	0.0001	0	0	0.0096	0	0.0068	0.0014	0.0001	0	0.0009	0.0051	0	0	0.0018	0.0023	0.0002	0.0003	0.0004	0	0
26_final	26	50, finala	Vaccinated 2	2	CVD1256	Mauritius	II	11427	0.1174	0	0.0733	0.0508	0.1381	0	0.0226	0.0029	0.0446	0.0172	0.0011	0.0238	0.0067	0.0083	0	0.0127	0.0168	0.0214	0.0004	0.0053	0.0002	0.0011	0.0001	0	0.0097	0	0.0022	0.0123	0.0001	0	0.0011	0.0019	0	0	0.0011	0.0005	0.0004	0.0018	0.0003	0	0
27_0	27	0	Vaccinated 2	2	CVD1256	Mauritius	II	11124	0.0002	0	0.1435	0.0291	0.0534	0.0059	0.0075	0.0073	0.0133	0.0443	0.0062	0.0085	0.033	0.0091	0.0056	0.019	0.0022	0.0005	0.0002	0.0572	0.0002	0.0462	0.0026	0	0.0082	0	0.0117	0.0093	0.1057	0	0.0049	0.0023	0.0005	0.0002	0.0061	0.0022	0	0.0022	0.0022	0	0
27_2	27	2	Vaccinated 2	2	CVD1256	Mauritius	II	12616	0.0001	0.0058	0.294	0.0071	0.0909	0	0.0523	0.0075	0.0269	0.0194	0.0008	0.0031	0.0442	0.0113	0.0002	0.0161	0.0057	0.0008	0	0.037	0.0082	0.0269	0	0	0.0056	0	0.0057	0.0037	0	0	0.0033	0.0086	0	0	0.0036	0.0021	0.0005	0.0145	0.0109	0	0
27_4	27	4	Vaccinated 2	2	CVD1256	Mauritius	II	5442	0	0	0.2339	0.1284	0.0805	0	0.0028	0.0039	0.0099	0.0018	0	0.3578	0.0022	0.0013	0	0.0026	0.002	0.0044	0	0.0004	0.0006	0.0096	0	0	0.0002	0	0.0002	0.0011	0	0	0.0101	0.0009	0	0	0	0	0	0.0017	0.0044	0	0
27_7	27	7	Vaccinated 2	2	CVD1256	Mauritius	II	9599	0.0004	0.0003	0.054	0.0183	0.1033	0	0.0124	0.0077	0.0159	0.118	0.0027	0.009	0.0496	0.0223	0.0005	0.0448	0.0011	0.0008	0.0003	0.026	0.001	0.0479	0	0	0.0235	0	0.0303	0.0024	0.0141	0	0.0014	0.0041	0.0017	0	0.0088	0.0001	0.0008	0.0032	0.0007	0	0
27_10	27	10	Vaccinated 2	2	CVD1256	Mauritius	II	11415	0.1089	0.0002	0.0379	0.085	0.1078	0	0.0069	0.0279	0.0117	0.0506	0.0107	0.0452	0.031	0.0073	0.0002	0.02	0.002	0.0004	0.006	0.027	0.0021	0.0891	0	0	0.0081	0	0.0085	0.0008	0.0002	0	0.0015	0.0018	0	0	0.0019	0.0002	0.0006	0.0016	0.0006	0	0
27_28	27	28	Vaccinated 2	2	CVD1256	Mauritius	II	8503	0.0002	0.0002	0.0548	0.0934	0.1063	0.0024	0.0092	0.0118	0.0302	0.0548	0.0018	0.0086	0.0262	0.0303	0.0467	0.0569	0.0022	0.004	0.0028	0.0081	0.0013	0.0194	0	0	0.0189	0	0.0173	0.0031	0.0627	0	0.0034	0.0035	0.0354	0	0.0074	0.0012	0.0018	0.0046	0.0024	0	0
27_30	27	30	Vaccinated 2	2	CVD1256	Mauritius	II	11291	0.0001	0.0002	0.1201	0.0533	0.0961	0	0.0199	0.0072	0.0233	0.0626	0.0004	0.0157	0.0269	0.0151	0	0.0425	0.0019	0.0085	0.0001	0.0137	0.0019	0.0036	0	0	0.03	0	0.0255	0.0064	0.0224	0	0.0049	0.0035	0	0	0.0062	0.0017	0.0022	0.0102	0.0021	0	0
27_final	27	44, finala	Vaccinated 2	2	CVD1256	Mauritius	II	10623	0.0107	0.0001	0.0156	0.0772	0.0218	0.0115	0.0028	0.0022	0.002	0.0714	0.0075	0.0018	0.0874	0.0097	0.0318	0.0312	0.0007	0.0011	0.1295	0.0112	0.0009	0.0058	0	0	0.0061	0	0.0067	0.0001	0.2585	0	0.0023	0.0023	0.0002	0	0.0117	0.0004	0.0004	0.0041	0.0004	0	0
28_0	28	0	Vaccinated 2	2	CVD1256	Mauritius	II	10362	0.092	0.0189	0.0212	0.0804	0.0649	0.0089	0.0217	0.0002	0.0211	0.0581	0.0256	0.0101	0.013	0.0337	0.0012	0.0188	0.0039	0.0088	0.0014	0.0401	0.0075	0	0	0	0.0141	0	0.0082	0.0021	0.0002	0	0.0016	0.0141	0.007	0	0.0032	0.0137	0.0012	0.0023	0.0004	0	0
28_2	28	2	Vaccinated 2	2	CVD1256	Mauritius	I	9515	0.1453	0.0017	0.0347	0.0248	0.0656	0.0001	0.0364	0.0039	0.0397	0.011	0.0061	0.0129	0.0009	0.0119	0	0.0044	0.0021	0.0193	0.0005	0.0149	0.0055	0.0001	0	0	0.0048	0	0.0024	0.0071	0	0	0.0004	0.0019	0	0	0.0028	0.0008	0.0006	0.0045	0.0015	0	0
28_4	28	4	Vaccinated 2	2	CVD1256	Mauritius	II	9505	0	0	0.1887	0.0053	0.1063	0	0.0164	0.0183	0.0331	0.0142	0.0014	0.0226	0.0417	0.0028	0	0.0113	0.0024	0.0015	0.0003	0.0147	0.0006	0.0207	0	0	0.0142	0	0.0021	0.0044	0.0002	0	0.0053	0.0006	0	0	0.0012	0.0001	0.0002	0.0567	0.0009	0	0
28_7	28	7	Vaccinated 2	2	CVD1256	Mauritius	II	8618	0.0596	0.0005	0.032	0.0056	0.0501	0.0003	0.0152	0.0008	0.0145	0.0757	0.0009	0.0108	0.102	0.0254	0.0001	0.035	0.0028	0.0041	0.0135	0.0236	0.0061	0	0	0	0.0154	0	0.0101	0.0034	0.0022	0	0.0035	0.013	0.0008	0	0.0061	0.0005	0.0005	0.0029	0.0055	0	0
28_10	28	10	Vaccinated 2	2	CVD1256	Mauritius	II	12454	0.0015	0.0005	0.0366	0.0326	0.0589	0.0022	0.0569	0.001	0.0165	0.0434	0.0072	0.01	0.0267	0.0114	0.0157	0.0112	0.0185	0.0015	0.0001	0.0148	0.0111	0	0	0	0.0096	0	0.0053	0.0025	0.1723	0	0.0008	0.0016	0.003	0	0.0014	0.0022	0.0009	0.0031	0.0097	0	0
28_28	28	28	Vaccinated 2	2	CVD1256	Mauritius	II	10854	0.0212	0	0.047	0.165	0.0618	0.0006	0.0428	0.0018	0.0288	0.0515	0.0002	0.0342	0.0249	0.0226	0.0029	0.0111	0.0124	0.0036	0.0061	0.0105	0.0021	0	0	0	0.0094	0	0.0068	0.0041	0.0225	0	0.0009	0.005	0.0006	0	0.0019	0.0039	0.0005	0.0011	0.0013	0	0
28_30	28	30	Vaccinated 2	2	CVD1256	Mauritius	III	9158	0.5703	0.0001	0.0494	0.0708	0.0317	0	0.0194	0.0004	0.0132	0.0129	0.0012	0.0041	0.0028	0.0076	0	0.0027	0.0014	0.0045	0.0008	0.002	0.001	0	0	0	0.0057	0	0.0031	0.0023	0	0	0.0009	0.0017	0	0	0.0013	0.0014	0.0002	0	0.0012	0	0
28_final	28	38, finala	Vaccinated 2	2	CVD1256	Mauritius	II	10829	0.0274	0.0001	0.0169	0.0405	0.2339	0	0.0364	0.006	0.0995	0.0091	0.0142	0.0387	0.0027	0.0028	0	0.0045	0.0189	0.0127	0	0.0111	0.0029	0.0003	0	0	0.0039	0	0.0006	0.0075	0.0071	0	0.0016	0.0012	0	0	0.0003	0.0002	0.0006	0.0051	0.0005	0	0
29_0	29	0	Vaccinated 2	2	CVD1256	Mauritius	I	12009	0.0037	0.6614	0.0152	0.0023	0.0338	0	0.0212	0.0258	0.0131	0.0059	0.0005	0.004	0.0065	0.0045	0.0009	0.0028	0.0096	0.0008	0	0.0028	0.0007	0.0007	0	0	0.0017	0	0.0013	0.0056	0	0	0.0002	0.0035	0.0002	0	0.0004	0.0007	0	0.0028	0.0003	0	0
29_2	29	2	Vaccinated 2	2	CVD1256	Mauritius	II	7699	0.0022	0.175	0.032	0.0022	0.1452	0	0.0503	0.03	0.0481	0.0217	0.0032	0.0164	0.016	0.013	0	0.0178	0.0083	0.0026	0	0.0074	0.0057	0.001	0	0	0.0088	0	0.0053	0.0087	0	0	0.0008	0.006	0	0	0.0025	0.0083	0.0013	0.0047	0.0012	0	0
29_4	29	4	Vaccinated 2	2	CVD1256	Mauritius	II	10703	0.0462	0.0127	0.0644	0.0015	0.1032	0	0.0715	0.0676	0.027	0.0312	0.0006	0.0132	0.0502	0.0245	0	0.028	0.0204	0.0008	0	0.0076	0.001	0.0147	0	0	0.0109	0	0.0091	0.0089	0.0001	0	0.0031	0.0043	0	0	0.0019	0.0102	0.0003	0.0058	0.0004	0	0
29_7	29	7	Vaccinated 2	2	CVD1256	Mauritius	II	9988	0.0272	0.0001	0.0338	0.0003	0.1501	0.0062	0.0791	0.0247	0.0266	0.0138	0.0004	0.0057	0.0387	0.0089	0.0027	0.0107	0.0135	0.0047	0.0966	0.0057	0.0004	0.0011	0	0	0.0068	0	0.0048	0.0132	0.0002	0	0.0008	0.004	0.0036	0	0.0012	0.0016	0.0006	0.0087	0	0	0
29_10	29	10	Vaccinated 2	2	CVD1256	Mauritius	II	10248	0.0103	0.0001	0.0845	0.0005	0.1423	0	0.0205	0.1063	0.0285	0.0301	0.0058	0.0165	0.0084	0.0027	0.0001	0.0077	0.0191	0.0091	0.0041	0.0191	0.0024	0.001	0	0	0.0089	0	0.0048	0.0151	0.0055	0	0.001	0.0029	0	0	0.0004	0.001	0.0002	0.0057	0.0001	0	0
29_28	29	28	Vaccinated 2	2	CVD1256	Mauritius	II	9604	0.0018	0	0.1191	0.0015	0.1635	0.0014	0.0344	0.0311	0.075	0.0093	0.0006	0.0177	0.0083	0.0124	0.0003	0.0075	0.0172	0.0095	0	0.0041	0.0009	0.0007	0	0	0.004	0	0.0039	0.0115	0.0028	0	0.0012	0.0041	0.0012	0	0.0006	0.001	0.0003	0.0085	0.0008	0	0
29_30	29	30	Vaccinated 2	2	CVD1256	Mauritius	II	8357	0.0002	0.0002	0.0416	0.0006	0.1541	0.0002	0.0485	0.0446	0.0814	0.0038	0.0109	0.0229	0.0037	0.0059	0	0.0035	0.0032	0.0219	0	0.0043	0.0011	0.0005	0	0	0.0035	0	0.0016	0.0185	0.0001	0	0.0002	0.0024	0	0	0.0002	0.0006	0.0007	0.0049	0.0005	0	0
29_final	29	42, finala	Vaccinated 2	2	CVD1256	Mauritius	II	11193	0.0031	0	0.0426	0.0013	0.1656	0	0.0289	0.0705	0.0408	0.0061	0.0138	0.0391	0.0019	0.008	0.0056	0.0046	0.0024	0.0216	0.0038	0.0062	0.001	0.0006	0	0	0.0043	0	0.0012	0.033	0	0	0.0003	0.0037	0	0	0.0008	0.0018	0.0008	0.0052	0.0003	0	0
30_0	30	0	Vaccinated 2	2	CVD1256	Mauritius	II	11615	0.0036	0.0003	0.2095	0.017	0.0573	0.0022	0.0106	0.0443	0.0288	0.0327	0.0894	0.0065	0.002	0.0108	0.0088	0.0123	0.0091	0.0021	0.0007	0.033	0.0005	0.0637	0.0003	0	0.0085	0	0.0015	0.0045	0.0004	0	0.0033	0.0013	0.0065	0.0003	0.0005	0.0081	0.0004	0.0175	0.0001	0	0
30_2	30	2	Vaccinated 2	2	CVD1256	Mauritius	II	8548	0.0101	0.0004	0.2044	0.0098	0.0473	0	0.0218	0.0321	0.0152	0.0322	0.0046	0.0041	0.0111	0.029	0	0.0119	0.0081	0.0006	0	0.037	0.0016	0.1324	0	0	0.0055	0	0.0033	0.0048	0.0001	0	0.0025	0.0044	0	0	0.0037	0.0062	0.0008	0.0358	0.0009	0	0
30_4	30	4	Vaccinated 2	2	CVD1256	Mauritius	II	9666	0.0448	0.0129	0.0641	0.0017	0.1121	0	0.0689	0.0663	0.0233	0.0319	0.0012	0.0204	0.0457	0.0157	0.0003	0.0308	0.0197	0.0014	0	0.0073	0.0003	0.0167	0	0	0.0124	0	0.0091	0.0062	0	0	0.0037	0.0067	0	0	0.0013	0.0104	0.0002	0.0038	0.0004	0	0
30_7	30	7	Vaccinated 2	2	CVD1256	Mauritius	II	11033	0.099	0.0004	0.0518	0.0049	0.0405	0.0001	0.0164	0.0142	0.0073	0.0538	0.0122	0.0044	0.015	0.0944	0.0082	0.0114	0.0098	0.007	0.0015	0.0586	0.0007	0.0197	0	0	0.0173	0	0.0062	0.0015	0.0044	0	0.0009	0.0076	0.0027	0	0.007	0.0013	0.0011	0.0157	0.0005	0	0
30_10	30	10	Vaccinated 2	2	CVD1256	Mauritius	II	9734	0.0823	0.0003	0.0453	0.0036	0.055	0.0001	0.0091	0.0213	0.0197	0.0206	0.0075	0.0041	0.0077	0.021	0.0227	0.0014	0.0013	0.006	0.1232	0.0151	0.0003	0.0806	0	0	0.0016	0	0.0031	0.0027	0.0017	0	0.0005	0.0012	0.0025	0	0.002	0.0006	0.001	0.0014	0.001	0	0
30_28	30	28	Vaccinated 2	2	CVD1256	Mauritius	II	9818	0.0076	0.0003	0.0204	0.0455	0.0755	0.0002	0.0047	0.0007	0.0114	0.1247	0.0131	0.006	0.1308	0.0286	0	0.0538	0.0151	0.0003	0.0004	0.0031	0.0016	0.0708	0	0	0.0117	0	0.0122	0.003	0.0006	0	0.0046	0.0176	0.0002	0	0.0016	0.0001	0.0018	0.0033	0.0002	0	0
30_30	30	30	Vaccinated 2	2	CVD1256	Mauritius	II	12082	0.031	0.0001	0.0938	0.0197	0.0643	0	0.02	0.0358	0.0304	0.0765	0.0124	0.0115	0.0226	0.0191	0.0001	0.0219	0.0142	0.0022	0	0.0089	0.0005	0.0348	0	0	0.019	0	0.0053	0.0042	0	0	0.0035	0.0022	0	0	0.0026	0.0002	0.0016	0.0098	0.0004	0	0
30_final	30	46, finala	Vaccinated 2	2	CVD1256	Mauritius	III	8785	0.7139	0.0003	0.0151	0.008	0.0126	0	0.0054	0.0015	0.0016	0.0272	0.0077	0.003	0.0122	0.0173	0.0002	0.0046	0.0011	0	0.0018	0.0121	0	0.0028	0	0	0.004	0	0.002	0.0001	0.0002	0	0.0005	0.004	0.0001	0	0.0024	0.0002	0.0019	0.0013	0	0	0
31_0	31	0	Vaccinated 2	2	CVD1256	Mauritius	II	10863	0.014	0.0193	0.0422	0.0045	0.1159	0	0.0112	0.0017	0.0339	0.0417	0.0093	0.0141	0.0125	0.026	0.011	0.0131	0.0584	0.0131	0.0004	0.0127	0.0003	0.0001	0	0	0.0091	0	0.0072	0.0585	0	0	0.0036	0.0026	0.0004	0	0.001	0.0119	0.0009	0.0145	0.0005	0	0
31_2	31	2	Vaccinated 2	2	CVD1256	Mauritius	II	11509	0.0001	0.0003	0.0563	0.0006	0.0898	0	0.0156	0.0023	0.0215	0.061	0.0002	0.0038	0.06	0.0225	0.0003	0.01	0.0485	0.0091	0.0013	0.0109	0.0003	0.0001	0	0	0.0077	0	0.0148	0.029	0	0	0.0017	0.0084	0	0	0.0089	0.005	0.0011	0.0097	0.0008	0	0
31_4	31	4	Vaccinated 2	2	CVD1256	Mauritius	II	5540	0	0	0.0578	0	0.1338	0	0.0278	0.0011	0.0915	0.0125	0	0.0161	0.0504	0.0063	0	0.0036	0.1016	0.0013	0	0.0007	0.0005	0	0	0	0.0056	0	0.0056	0.024	0	0	0.0016	0.0011	0.0004	0	0.0027	0.0004	0.0014	0.004	0.0013	0	0
31_7	31	7	Vaccinated 2	2	CVD1256	Mauritius	II	9789	0	0	0.0755	0.0016	0.0634	0.0001	0.019	0.0007	0.0293	0.0327	0.0008	0.006	0.0183	0.0125	0.0069	0.0136	0.059	0.0054	0.0012	0.0146	0.0012	0.0001	0	0	0.0124	0	0.0075	0.0088	0	0	0.0019	0.0052	0.0058	0	0.0043	0.0108	0.0012	0.0041	0.0015	0	0
31_10	31	10	Vaccinated 2	2	CVD1256	Mauritius	II	11291	0.0032	0.0002	0.0511	0.0035	0.0943	0	0.0194	0.0008	0.0345	0.0552	0.0026	0.0061	0.011	0.0182	0.0034	0.025	0.0459	0.0097	0.0222	0.0217	0.0019	0.0012	0	0	0.0179	0	0.0159	0.0073	0.0001	0	0.0099	0.0024	0	0	0.0018	0.0858	0.0012	0.0017	0.0003	0	0
31_28	31	28	Vaccinated 2	2	CVD1256	Mauritius	II	10558	0.0001	0	0.0303	0.0155	0.132	0.0001	0.0178	0.0036	0.0411	0.0936	0.0005	0.0246	0.1354	0.0136	0.0013	0.0276	0.0732	0.0003	0.0003	0.0166	0.0023	0.0002	0	0	0.0041	0	0.0116	0.0146	0.0027	0	0.0027	0.0081	0.0005	0	0.002	0.005	0.0005	0.0055	0.0003	0	0
31_30	31	30	Vaccinated 2	2	CVD1256	Mauritius	II	7394	0.0001	0	0.0373	0.0101	0.1486	0.0005	0.048	0.0107	0.0717	0.0214	0.0141	0.0291	0.0076	0.0105	0.0003	0.0196	0.0357	0.0041	0.0016	0.0131	0.0011	0.0001	0	0	0.0088	0	0.0101	0.0384	0	0	0.0008	0.0034	0.0001	0	0.0027	0.0004	0.0008	0.0034	0.0005	0	0
13_1	13	1	Challenged	3	None	Indochina	IV	10585	0.0911	0.0035	0.002	0.4247	0.0077	0.0999	0.0211	0.0047	0.0033	0	0.0293	0.0129	0.0003	0.0094	0.0028	0.0064	0	0.0016	0	0	0	0	0	0	0.0019	0	0	0.0019	0	0	0.0001	0	0.0006	0.0043	0	0	0.003	0	0.0001	0	0
13_2	13	2	Challenged	3	None	Indochina	III	12051	0.5161	0.0031	0.0034	0.2723	0.0042	0.003	0.0046	0.0156	0.0018	0	0.0153	0.0018	0.0002	0.0035	0.0011	0.0022	0	0.0007	0.0007	0	0	0	0	0	0.0001	0	0	0.0007	0	0	0.0002	0	0.0008	0.0022	0.0001	0	0.0022	0	0.0002	0	0
13_3	13	3	Challenged	3	None	Indochina	III	10774	0.8018	0.002	0.0003	0.037	0.0051	0.0217	0.0015	0.005	0.0028	0.0013	0.0158	0.0008	0.0001	0.0022	0.0051	0.0012	0	0.001	0.0025	0	0.0001	0	0.0004	0	0.0003	0	0.0002	0.0002	0	0	0	0	0.0024	0.0013	0.0003	0	0.002	0	0	0	0.0003
13_4	13	4	Challenged	3	None	Indochina	IV	11519	0.2855	0.0017	0.0044	0.2464	0.0052	0.1445	0.0045	0.0223	0.0011	0.0002	0.0101	0.0017	0.0032	0.0025	0.036	0.0008	0.0001	0.003	0.0016	0	0	0	0	0	0	0	0	0.0011	0.0001	0	0	0	0.0405	0.0014	0.0002	0	0.0041	0	0.0007	0.0001	0
13_5	13	5	Challenged	3	None	Indochina	IV	8906	0.1088	0.0121	0.0056	0.3168	0.0205	0.0665	0.0094	0.0201	0.0052	0.0001	0.0029	0.0052	0.0012	0.004	0.1656	0.0022	0	0.0018	0.008	0.0002	0.0003	0	0	0	0.0002	0	0	0.0024	0	0	0.0001	0.001	0.0044	0.0012	0.0012	0	0.0071	0.0002	0.0001	0.0006	0
13_8	13	8	Challenged	3	None	Indochina	III	9705	0.6616	0	0.0003	0.0319	0.0132	0.0184	0.0274	0.0046	0.0056	0	0.0001	0.004	0	0.0042	0.0641	0.0082	0	0	0.0127	0.0001	0.0002	0	0.0001	0	0.0012	0	0	0.004	0	0	0.0003	0	0	0.0102	0.0025	0	0.0004	0	0	0	0
13_15	13	15	Challenged	3	None	Indochina	III	7267	0.2092	0.12	0.0116	0.3019	0.0103	0.0092	0.0222	0.0008	0.0014	0.0081	0.0403	0.0153	0.0008	0.0074	0.0006	0.0316	0	0	0.0662	0	0	0	0	0	0.0015	0	0.0001	0	0	0	0.0006	0	0	0.0162	0.0034	0	0.0039	0.0001	0	0	0
13_28	13	28	Challenged	3	None	Indochina	III	11074	0.7144	0.0285	0.0026	0.0637	0.0039	0.0023	0.0058	0.0014	0.0012	0.0005	0.0042	0.0358	0.0017	0.0033	0.0083	0.0012	0	0.0045	0	0.0002	0.0007	0	0	0	0.0003	0.0001	0	0.0004	0	0	0	0	0.0055	0.0007	0.001	0	0.0073	0.0001	0.0004	0	0
14_1	14	1	Challenged	3	None	Indochina	III	6592	0.3439	0.2788	0.0109	0.1255	0.0006	0.0326	0.0044	0.0002	0.0002	0.0012	0.1368	0.0006	0.0005	0.0023	0.0023	0.0002	0.0002	0	0.0017	0.0002	0.0003	0	0	0	0	0	0	0	0	0	0.0003	0	0.0006	0.0068	0	0	0.0023	0	0	0	0
14_2	14	2	Challenged	3	None	Indochina	III	7654	0.4259	0.1598	0.0912	0.1219	0.0014	0.005	0.0048	0.0007	0.0005	0.0127	0.0724	0.0007	0.0013	0.0033	0.0035	0	0	0.0012	0.0003	0	0.0004	0	0	0	0	0	0	0	0	0	0.0012	0	0	0.0076	0.0005	0.0001	0.0078	0	0.0009	0.0001	0
14_3	14	3	Challenged	3	None	Indochina	I	10022	0.2047	0.0847	0.0427	0.0025	0.0016	0.0561	0.0023	0.0012	0.0004	0.01	0.001	0.0005	0.0051	0.0003	0.0012	0	0.0001	0.0004	0.0001	0.0007	0.0021	0	0.3351	0	0.0001	0.0055	0.0001	0.0019	0	0	0.0019	0	0.0257	0.0386	0.0019	0.0003	0.0014	0	0.0014	0.0434	0.0013
14_4	14	4	Challenged	3	None	Indochina	III	5800	0.6576	0.0414	0.0021	0.15	0.0009	0.0271	0.0002	0	0.0002	0.0002	0.0367	0	0	0.006	0.0021	0.0005	0	0	0.0045	0	0	0	0	0	0	0	0	0	0	0	0.0002	0	0.0014	0.0122	0.0007	0	0.0066	0	0	0.0002	0
14_5	14	5	Challenged	3	None	Indochina	III	9832	0.4232	0.2093	0.0241	0.1866	0.0006	0.0129	0.0011	0	0.0002	0.0163	0.0373	0.0002	0.0006	0.002	0.0148	0	0.0001	0	0	0	0.0003	0	0	0	0	0	0	0.0001	0	0	0.0005	0.0001	0.002	0.001	0.0017	0	0.0012	0	0.0002	0.0001	0
14_8	14	8	Challenged	3	None	Indochina	IV	10677	0.4705	0.081	0.0007	0.0948	0.0002	0.2704	0.0003	0.0001	0.0001	0.0012	0.0063	0.0003	0.0003	0.0002	0.0006	0.0001	0	0	0.0022	0	0	0	0	0	0	0	0	0.0001	0	0	0.0003	0.0005	0	0.0023	0.0007	0	0.0022	0	0.0001	0	0
14_15	14	15	Challenged	3	None	Indochina	III	9153	0.3909	0.2174	0.0294	0.0995	0.0016	0.096	0.0001	0.0043	0.0003	0.0073	0.0048	0.0003	0.0009	0.001	0	0	0.0001	0.001	0.0128	0.0001	0.0004	0	0	0	0	0	0	0.0008	0	0	0.0002	0.0002	0.0052	0.0042	0.0004	0	0.0025	0.0001	0.0009	0	0
14_28	14	28	Challenged	3	None	Indochina	I	10076	0.1892	0.5969	0.0109	0.0912	0.0003	0.0005	0.002	0.0003	0.0002	0.0188	0.0261	0	0.0012	0.0051	0.0005	0.0007	0	0	0.0004	0.0002	0.0001	0	0	0	0	0	0.0001	0.0002	0	0	0.0002	0.0001	0	0.0005	0.0074	0	0.0034	0	0	0	0
15_1	15	1	Challenged	3	PBS	Indochina	III	10870	0.53	0.0107	0.0006	0.1709	0.0035	0.0942	0.0126	0.0035	0.0017	0.0001	0.0571	0.0345	0.0001	0.0035	0.0006	0.0024	0	0.0011	0.0002	0	0	0	0	0	0.0002	0	0	0.0008	0	0	0.0006	0	0.0008	0.0006	0	0	0.0009	0	0.0002	0	0
15_2	15	2	Challenged	3	PBS	Indochina	IV	10749	0.2657	0.0221	0.0014	0.2612	0.0076	0.0423	0.0159	0.0534	0.0044	0	0.1109	0.0805	0.0004	0.0021	0.0034	0.0027	0	0.0005	0.0001	0.0001	0	0	0	0	0.0001	0	0	0.0016	0	0	0.0001	0	0.0034	0.0027	0.0001	0	0.002	0.0001	0.0014	0	0
15_3	15	3	Challenged	3	PBS	Indochina	IV	8953	0.1038	0.0051	0.0009	0.0003	0.0113	0.0374	0.0012	0.0028	0.004	0.0008	0.0003	0.0007	0.0019	0.0004	0.0011	0.0012	0.0001	0.0006	0	0.0001	0.0006	0	0.4712	0.0002	0.0002	0.0216	0.0002	0.0003	0	0	0.001	0	0.0404	0.0666	0	0.0001	0.0001	0	0.0003	0.0348	0.0343
15_4	15	4	Challenged	3	PBS	Indochina	IV	7342	0.1539	0.0007	0.0146	0.0264	0.0365	0.0854	0.0072	0.2204	0.0396	0.0008	0.003	0.0039	0.0008	0.001	0.0001	0.0004	0.0007	0.0015	0.0001	0.0005	0.0012	0	0.0003	0	0.0004	0	0	0.0018	0	0	0.0011	0	0.0012	0	0.0015	0	0.0018	0.0004	0.021	0.0004	0
15_5	15	5	Challenged	3	PBS	Indochina	III	8309	0.3861	0.0002	0.0024	0.0412	0.0073	0.0077	0.1748	0.0031	0.0028	0.0001	0.0016	0	0.0001	0.0014	0.0137	0.0001	0.0001	0.0004	0.0004	0	0	0	0	0	0	0	0	0	0	0	0.0004	0.0001	0.0016	0.0013	0.0002	0	0.0012	0	0.0001	0.0001	0
15_8	15	8	Challenged	3	PBS	Indochina	I	10110	0.1517	0.2792	0.1201	0.037	0.0021	0.003	0.0058	0.0038	0.0006	0.0015	0.0171	0.0031	0.0073	0.0174	0.0001	0.006	0	0.0001	0.2575	0	0.0001	0	0	0	0.0003	0	0	0.0008	0	0	0.0026	0	0	0.0023	0.0004	0	0	0	0.001	0	0
15_18	15	15	Challenged	3	PBS	Indochina	III	10973	0.5618	0	0.0109	0.1139	0.0254	0.0017	0.0077	0.0007	0.0127	0.0005	0	0.0016	0.0002	0.0031	0.0042	0.0008	0	0.0005	0.0001	0.0004	0.0007	0	0	0	0.001	0	0.0001	0.0198	0	0	0.0002	0.0002	0.0001	0.0023	0.0036	0	0	0.0001	0.0018	0	0
15_28	15	28	Challenged	3	PBS	Indochina	III	11438	0.2244	0.1579	0.001	0.302	0.0035	0.016	0.0099	0.0075	0.0009	0.0004	0.0567	0.0044	0.0017	0.0052	0.0581	0.003	0	0.0006	0.0117	0	0.0001	0	0	0	0	0	0	0.0007	0	0	0.0003	0	0.0011	0.0003	0.0001	0.0003	0.0021	0	0	0	0
C1_0	C1	0	Control	4	None	Indochina	II	4573	0.0308	0.0704	0.2088	0.0083	0.0838	0	0.075	0.0004	0.0289	0.0155	0	0.0641	0.0232	0.0212	0	0.0168	0.0258	0.0011	0.0017	0.0007	0.0039	0.0007	0	0	0.0026	0	0.0059	0.0109	0	0	0.0186	0.0011	0.0007	0	0.0013	0	0.0004	0.0017	0.0048	0	0
C1_1	C1	1	Control	4	None	Indochina	II	4107	0.0256	0.1488	0.1999	0.0027	0.0743	0	0.0631	0.0022	0.0348	0.0117	0.0005	0.0373	0.0127	0.0151	0	0.0129	0.0146	0.0017	0.0005	0.0005	0.0012	0.0022	0	0	0.0029	0	0.0046	0.0032	0	0	0.0112	0.0022	0	0	0.0015	0.001	0.0002	0.0029	0.0102	0	0
C1_2	C1	2	Control	4	None	Indochina	II	3900	0.0546	0.11	0.1354	0.0054	0.0956	0	0.049	0.0044	0.0454	0.0213	0	0.0277	0.0121	0.0144	0	0.0156	0.0182	0.0028	0.001	0.0021	0.0033	0.0051	0	0	0.0059	0	0.0031	0.0038	0.0003	0	0.0092	0.0021	0.0008	0	0.0008	0.0003	0	0.0008	0.0074	0	0
C1_6	C1	6	Control	4	None	Indochina	II	3921	0.0541	0.0064	0.1849	0.0043	0.1237	0	0.063	0.002	0.0388	0.0324	0	0.0099	0.0184	0.0097	0	0.0143	0.0089	0.0033	0.0013	0.0018	0.0018	0.0064	0	0	0.0054	0	0.0026	0.0097	0	0	0.0043	0.0036	0	0	0.0033	0	0.0003	0.0003	0.0051	0	0
C1_7	C1	7	Control	4	None	Indochina	II	3730	0.1225	0.0155	0.2164	0.0094	0.122	0	0.044	0.0008	0.0496	0.0239	0.0003	0.0102	0.0198	0.0088	0.0003	0.0223	0.0099	0.0038	0	0.0016	0.0046	0.0043	0	0	0.0027	0	0.0075	0.0086	0	0	0.0099	0.0016	0	0	0	0	0	0.0013	0.0064	0	0
C1_14	C1	14	Control	4	None	Indochina	I	5083	0.3303	0.0659	0.1104	0.0031	0.0649	0	0.0126	0.0004	0.0696	0.0161	0.0006	0.0039	0.0151	0.0047	0	0.0126	0.0004	0.0002	0.0016	0	0.0016	0.0026	0	0	0.0026	0	0.0041	0.001	0	0	0.0022	0.0039	0	0	0.0014	0.0004	0.001	0.0008	0.0063	0	0
C2_0	C2	0	Control	4	None	Indochina	I	2133	0.4918	0.0281	0.067	0.0014	0.0511	0	0.0056	0.0005	0.0394	0.015	0	0.0009	0.007	0.0094	0	0.0094	0.0094	0.0028	0.0009	0.0052	0	0.0098	0	0	0.0028	0	0.0113	0.007	0	0	0.0178	0.0014	0	0	0.0005	0	0.0005	0	0	0	0
C2_1	C2	1	Control	4	None	Indochina	I	3359	0.1727	0.0965	0.1093	0.0063	0.1006	0	0.0298	0.0116	0.0628	0.0152	0.0009	0.0095	0.0042	0.0039	0.003	0.0125	0.0161	0.0036	0.0003	0.0027	0.0024	0.0039	0	0	0.003	0	0.0051	0.0015	0	0	0.0176	0.0051	0	0	0.0021	0.0003	0.0003	0.0021	0.0018	0	0
C2_2	C2	2	Control	4	None	Indochina	I	2603	0.2067	0.214	0.0972	0.0058	0.0576	0	0.0515	0.0192	0.0415	0.0242	0	0.0054	0.0092	0.0081	0	0.0173	0.0096	0.0061	0.0015	0.0038	0.0027	0.0023	0	0	0.0031	0	0.0092	0	0	0	0.0073	0.0108	0	0	0.0015	0	0	0.0023	0.0023	0	0
C2_6	C2	6	Control	4	None	Indochina	I	4145	0.2871	0.1539	0.0483	0.0145	0.0449	0.0002	0.0191	0.0007	0.0133	0.0396	0.0036	0.0007	0.0256	0.0142	0.0005	0.0451	0.007	0.0048	0.0097	0.0068	0.0036	0.0058	0	0	0.0121	0	0.0343	0	0	0	0.0246	0.0116	0.0005	0	0.0019	0.0024	0	0	0.0014	0	0
C2_7	C2	7	Control	4	None	Indochina	III	2467	0.7004	0.1897	0.0012	0.0113	0.0045	0	0.0012	0	0.002	0.0045	0.0012	0	0.0081	0.0057	0	0.0118	0	0	0.0024	0.0012	0	0.0024	0	0	0.002	0	0.0085	0.0004	0	0	0.0012	0.0049	0	0	0.0004	0.0004	0	0	0	0	0
C2_14	C2	14	Control	4	None	Indochina	I	5024	0.4482	0.1087	0.0595	0.005	0.0404	0	0.0243	0.0008	0.0414	0.0042	0.0004	0.0024	0.004	0.0105	0	0.0056	0.003	0.0034	0.0014	0.0032	0.0022	0.0004	0	0	0.0036	0	0.0082	0	0	0	0.003	0.0044	0	0	0.0012	0.0004	0.0008	0.002	0.0068	0	0
C3_0	C3	0	Control	4	None	Indochina	I	2498	0.4636	0.0488	0.0721	0.0028	0.0568	0.0004	0.0176	0	0.0448	0.0128	0	0.004	0.006	0.0084	0	0.0024	0.0112	0.0028	0.0016	0.002	0.002	0.002	0	0	0.006	0	0.0048	0.0068	0	0	0.0136	0.0008	0	0	0.0024	0.0004	0	0.002	0	0	0
C3_1	C3	1	Control	4	None	Indochina	I	2976	0.4032	0.1563	0.1132	0.0024	0.0417	0	0.0111	0.0003	0.0202	0.0161	0.0003	0.0013	0.0067	0.0057	0	0.006	0.0104	0.0013	0.001	0.0013	0.001	0.0003	0	0	0.0064	0	0.0101	0.003	0	0	0.0155	0.001	0	0	0.0013	0.0003	0	0.001	0.0003	0	0
C3_2	C3	2	Control	4	None	Indochina	I	3144	0.1877	0.2955	0.1816	0.0045	0.0331	0	0.0172	0	0.0143	0.0149	0.0006	0.0016	0.0102	0.0016	0	0.0057	0.0108	0.0025	0.001	0.0048	0.001	0.0022	0	0	0.0073	0	0.0108	0.0089	0	0	0.0134	0.0025	0	0	0.0003	0	0.0003	0.0003	0.0006	0	0
C3_6	C3	6	Control	4	None	Indochina	I	3158	0.5237	0.076	0.0795	0.0016	0.0424	0	0.0247	0.0003	0.0215	0.012	0.0003	0.0035	0.0028	0.0047	0.0003	0.0038	0.0184	0.0013	0.0019	0.0006	0.0006	0.0013	0	0	0.0019	0	0.006	0.0051	0	0	0.0174	0.0032	0	0	0.0019	0	0	0.0009	0.0006	0	0
C3_7	C3	7	Control	4	None	Indochina	I	3487	0.4012	0.2681	0.0069	0.0229	0.0295	0	0.0098	0.0009	0.0026	0.0175	0.0009	0	0.0201	0.0155	0.0011	0.0295	0.0009	0.0003	0.0066	0.0052	0.0014	0.0054	0	0	0.0066	0	0.033	0.0009	0	0	0.0103	0.008	0.0003	0	0.0014	0.0017	0.0009	0.0003	0.0006	0	0
C3_14	C3	14	Control	4	None	Indochina	I	3702	0.3857	0.188	0.081	0.0057	0.0367	0	0.0092	0	0.0354	0.0135	0.0003	0.0032	0.0051	0.0068	0.0003	0.0068	0.0038	0.0057	0.0011	0.0022	0.0003	0.0005	0	0	0.0014	0	0.0043	0.0068	0	0	0.0043	0.0022	0	0	0.0011	0.0008	0	0.0011	0.0035	0	0
C4_0	C4	0	Control	4	None	Indochina	II	3531	0.0388	0.013	0.1334	0.0082	0.0711	0	0.0351	0.0003	0.0385	0.0241	0.0059	0.0351	0.0411	0.0555	0	0.0436	0.0278	0.0034	0	0.0042	0.0023	0.0054	0	0	0.011	0	0.0068	0.0136	0	0	0.0122	0.0113	0.0006	0	0.0045	0	0.0003	0.0017	0.004	0	0
C4_1	C4	1	Control	4	None	Indochina	II	3156	0.0092	0.0865	0.1442	0.007	0.0653	0	0.0146	0.001	0.0317	0.0301	0.0003	0.0402	0.0526	0.0374	0.0003	0.039	0.0171	0.012	0.0022	0	0.0013	0.0079	0	0	0.0108	0	0.007	0.0082	0	0	0.0162	0.006	0	0	0.0022	0	0.0006	0.0016	0.0149	0	0
C4_2	C4	2	Control	4	None	Indochina	I	4494	0.0445	0.1869	0.097	0.0082	0.0814	0	0.0154	0.0009	0.0354	0.0147	0.0036	0.0345	0.0156	0.0227	0	0.0249	0.0036	0.0091	0	0.0009	0.0036	0.0031	0	0	0.0151	0	0.0065	0.002	0	0	0.0091	0.0033	0	0	0.0029	0.0002	0.0002	0.0013	0.0038	0	0
C4_6	C4	6	Control	4	None	Indochina	II	5645	0.0135	0.009	0.1226	0.0058	0.1353	0	0.0259	0.0014	0.0333	0.0225	0.003	0.0138	0.0264	0.0317	0	0.0471	0.0135	0.0012	0.0005	0.0019	0.0019	0.0027	0	0	0.0154	0	0.0099	0.0021	0	0	0.0213	0.0073	0	0	0.0027	0.0025	0.0002	0.0005	0.0023	0	0
C4_7	C4	7	Control	4	None	Indochina	II	4794	0.1012	0.0423	0.0897	0.0081	0.1214	0	0.0198	0	0.0534	0.0254	0.0015	0.0096	0.0309	0.0175	0	0.0344	0.0065	0.0015	0.0006	0.0015	0.0027	0.0077	0	0	0.0136	0	0.0125	0.001	0	0	0.0121	0.0119	0	0	0.0021	0.0015	0.0006	0.0004	0.0013	0	0
C4_14	C4	14	Control	4	None	Indochina	II	6080	0.027	0.1393	0.2714	0.0058	0.0625	0	0.0071	0	0.0225	0.0262	0.0046	0.0036	0.0212	0.0331	0.0002	0.0544	0.0044	0.0018	0.0002	0.0015	0.001	0.001	0	0	0.0084	0	0.0107	0.0003	0	0	0.0153	0.0056	0	0	0.0023	0.0035	0.0003	0.001	0.0015	0	0
C5_0	C5	0	Control	4	None	Indochina	III	4015	0.8981	0	0.005	0.0002	0.0115	0	0.0017	0	0.0022	0.005	0	0.0022	0.002	0.0032	0	0.0065	0.0037	0	0	0.0005	0.0015	0.002	0	0	0.0027	0	0.002	0	0	0	0.0012	0	0	0	0.0002	0	0.0002	0	0.0005	0	0
C5_1	C5	1	Control	4	None	Indochina	III	4090	0.8418	0	0.0306	0	0.02	0	0.0027	0.0005	0.0044	0.0064	0	0.0032	0.0017	0.0029	0	0.0046	0.0022	0.0002	0.0002	0.0005	0.0005	0.0017	0	0	0.0044	0	0.0017	0.001	0	0	0.002	0.0002	0	0	0.0012	0	0	0.0002	0.0007	0	0
C5_2	C5	2	Control	4	None	Indochina	III	9239	0.8343	0.0003	0.0122	0.0008	0.0293	0	0.0042	0.0006	0.0069	0.0035	0	0.004	0.0017	0.0031	0	0.007	0.0013	0.0005	0.0001	0.0002	0.0009	0.0025	0	0	0.0035	0	0.0015	0.0017	0	0	0.0025	0.0005	0	0	0.0005	0	0	0.0002	0.0003	0	0
C5_6	C5	6	Control	4	None	Indochina	III	3555	0.836	0	0.0028	0.0025	0.0242	0	0.0025	0	0.0039	0.0093	0	0.0006	0.002	0.0073	0	0.0115	0.0008	0	0.0006	0.0011	0.0003	0.002	0	0	0.0059	0	0.0048	0.0006	0	0	0.0028	0.0011	0	0	0.0006	0.0006	0.0003	0	0	0	0
C5_7	C5	7	Control	4	None	Indochina	III	4329	0.729	0	0.0538	0.0007	0.0289	0	0.0058	0.0002	0.006	0.0152	0	0.0016	0.0042	0.0088	0.0002	0.0111	0.0025	0	0.0005	0.0002	0.0012	0.0028	0	0	0.0044	0	0.0032	0.0002	0	0	0.0095	0.0016	0	0	0.0002	0.0005	0.0002	0	0.0016	0	0
C5_14	C5	14	Control	4	None	Indochina	I	3602	0.5211	0	0.1913	0.0022	0.0372	0	0.0058	0.0003	0.0175	0.0108	0	0.0044	0.0056	0.0061	0	0.0119	0.005	0.0003	0.0006	0.0006	0.0006	0.0011	0	0	0.0014	0	0.0042	0	0	0	0.0089	0.0011	0	0	0.0019	0	0.0003	0.0025	0.0067	0	0
C6_0	C6	0	Control	4	None	Indochina	I	2782	0.3559	0	0.0539	0.0126	0.0942	0	0.0201	0.0007	0.018	0.0309	0.0054	0.0061	0.0205	0.0144	0	0.0226	0.009	0.0014	0	0.0072	0.0043	0	0	0	0.0122	0	0.0173	0.0237	0	0	0.0122	0.0122	0	0	0.0004	0	0.0004	0	0.0018	0	0
C6_1	C6	1	Control	4	None	Indochina	III	2160	0.7755	0.0009	0.0014	0.025	0.0176	0	0.0088	0	0.0056	0.0065	0.0079	0.0005	0.0093	0.0176	0	0.0032	0	0	0.0005	0.0014	0.0005	0	0	0	0.0097	0	0.0042	0.0046	0	0	0.0037	0.0074	0	0	0.0005	0	0	0	0	0	0
C6_2	C6	2	Control	4	None	Indochina	II	4972	0.15	0	0.17	0.007	0.0678	0	0.0189	0.0014	0.0278	0.0129	0.003	0.0161	0.0105	0.0304	0	0.0288	0.0259	0.0016	0.0004	0.0032	0.001	0	0	0	0.0125	0	0.0175	0.0101	0	0	0.0217	0.0058	0.0002	0	0.002	0	0.0006	0.0014	0.0072	0	0
C6_6	C6	6	Control	4	None	Indochina	II	3504	0.0679	0.0009	0.1241	0.0114	0.0545	0	0.0137	0.0003	0.0517	0.0009	0.0046	0.0049	0.0254	0.0793	0	0.0354	0.0205	0.006	0	0.0003	0.0157	0	0	0	0.022	0	0.0197	0.0043	0	0	0.0334	0.0091	0	0	0.0023	0	0.0003	0.002	0.0017	0	0
C6_7	C6	7	Control	4	None	Indochina	II	6531	0.1015	0.0002	0.0364	0.066	0.0567	0	0.0075	0.0009	0.087	0.0052	0.0276	0.0046	0.0207	0.0354	0	0.0439	0.0109	0.0043	0.0002	0	0.0162	0	0	0	0.022	0	0.0225	0.0014	0	0	0.0089	0.0109	0.0002	0	0.004	0	0.0011	0.0002	0.0035	0	0
C6_14	C6	14	Control	4	None	Indochina	I	4771	0.3676	0.0002	0.0876	0.0379	0.0639	0	0.0113	0.0002	0.0392	0.0172	0.0071	0.0038	0.0197	0.0302	0	0.0214	0.0015	0.001	0.0013	0.0004	0.0046	0	0	0	0.0153	0	0.0149	0.0057	0	0	0.0065	0.0103	0	0	0.001	0	0.0008	0.0008	0.0023	0	0
aFinal day indicates last day of sampling (range: 35-50, one macaque per day)
bMean reads/samples: 7433 (SD: 2465; median: 7443)
cSome sample timepoints were excluded due to lack of sample collection or low read counts.
[truncated: 206 more columns]
