# Supplementary material for: Differential Response of the Cynomolgus Macaque Gut Microbiota to Shigella Infection
Source: PLoS One. 2013 Jun 5;8(6):e64212. doi: 10.1371/journal.pone.0064212 (PMC3673915; doi:10.1371/journal.pone.0064212)
Supplement: Dataset S2 — List of significantly correlated genera and immunological or clinical measurements (p<0.01; LSA Q value >0.40) calculated using local similarity analysis (LSA) for macaques in study 1 and 2. (XLS) [file pone.0064212.s010.xls]

## Sheet: Sheet1
Table S4. List of significantly associated genera and clinical/immunological measurements, calculated by local similarity alignment (LSA) for macaques in study 1.
Study	Node X	Node Y	LSA Q Value
1	Acinetobacter	Brachyspira	0.54464
1	Acinetobacter	Clostridium_clade_2	0.443116
1	Acinetobacter	Dehalobacterium	0.409833
1	Acinetobacter	Kurthia	0.623776
1	Acinetobacter	Lachnospira	-0.411703
1	Acinetobacter	Psychrobacter	0.436659
1	Acinetobacter	Trichococcus	0.4552
1	Adlercreutzia	Collinsella	0.671782
1	Adlercreutzia	Desulfovibrio	0.424817
1	Adlercreutzia	Dysgonomonas	0.517068
1	Adlercreutzia	Fibrobacter	0.591557
1	Adlercreutzia	Helicobacter	0.424402
1	Adlercreutzia	otu_1033	0.603164
1	Adlercreutzia	otu_2201	0.479426
1	Adlercreutzia	otu_4182	0.599202
1	Adlercreutzia	otu_915	0.544079
1	Adlercreutzia	Paludibacter	0.575708
1	Adlercreutzia	Parabacteroides	0.695832
1	Adlercreutzia	Roseburia	-0.411776
1	Aerococcus	Acinetobacter	0.477197
1	Aerococcus	Catenibacterium	0.460816
1	Aerococcus	Clostridium_clade_2	0.669368
1	Aerococcus	Dehalobacterium	0.835701
1	Aerococcus	Dorea	0.632997
1	Aerococcus	Eubacterium_clade_3	0.617087
1	Aerococcus	Faecalibacterium	0.577702
1	Aerococcus	Fibrobacter	0.449423
1	Aerococcus	Helicobacter	-0.429349
1	Aerococcus	Kurthia	0.456519
1	Aerococcus	Megasphaera	0.626763
1	Aerococcus	otu_2066	-0.610203
1	Aerococcus	otu_2201	0.42556
1	Aerococcus	otu_4182	-0.499857
1	Aerococcus	Pedobacter	0.486915
1	Aerococcus	Peptococcus	0.551974
1	Aerococcus	Rummeliibacillus	0.6043
1	Aerococcus	Subdoligranulum	0.539672
1	Blautia	Acinetobacter	0.570515
1	Blautia	Aerococcus	0.764799
1	Blautia	Butyrivibrio	0.451736
1	Blautia	Clostridium_clade_2	0.535647
1	Blautia	Comamonas	0.459321
1	Blautia	Dehalobacterium	0.704142
1	Blautia	Dorea	0.550443
1	Blautia	Dysgonomonas	0.423036
1	Blautia	Eubacterium_clade_1	0.565473
1	Blautia	Eubacterium_clade_3	0.662245
1	Blautia	Faecalibacterium	0.523801
1	Blautia	Fibrobacter	0.413897
1	Blautia	Flavobacterium	0.608073
1	Blautia	Incertae_sedis_family_Lachnospiraceae	0.851478
1	Blautia	Kurthia	0.45947
1	Blautia	Lachnospira	-0.446361
1	Blautia	Megasphaera	0.590831
1	Blautia	otu_2066	-0.584879
1	Blautia	otu_2201	0.586117
1	Blautia	otu_4381	0.509199
1	Blautia	Pedobacter	0.706469
1	Blautia	Peptococcus	0.421265
1	Blautia	Psychrobacter	0.428488
1	Blautia	Ruminococcus_clade_2	0.527684
1	Blautia	Rummeliibacillus	0.583919
1	Blautia	Sphaerochaeta	0.42362
1	Blautia	Sphingobacterium	0.438583
1	Blautia	Subdoligranulum	0.501175
1	Blautia	Trichococcus	0.408382
1	Blautia	Weissella	-0.651107
1	Blautia	Yersinia	0.743031
1	Brachyspira	Campylobacter	0.43667
1	Brachyspira	Desulfovibrio	0.404688
1	Brachyspira	Trichococcus	0.486713
1	Bulleidia	Aerococcus	0.660312
1	Bulleidia	Blautia	0.787041
1	Bulleidia	Butyrivibrio	0.496267
1	Bulleidia	Catenibacterium	0.468279
1	Bulleidia	Clostridium_clade_2	0.452595
1	Bulleidia	Clostridium_clade_3	0.527601
1	Bulleidia	Collinsella	0.453876
1	Bulleidia	Comamonas	0.419378
1	Bulleidia	Coprococcus	0.434311
1	Bulleidia	Dehalobacterium	0.561859
1	Bulleidia	Dialister	0.465159
1	Bulleidia	Dorea	0.564411
1	Bulleidia	Eubacterium_clade_1	0.469362
1	Bulleidia	Eubacterium_clade_3	0.590153
1	Bulleidia	Faecalibacterium	0.493252
1	Bulleidia	Flavobacterium	0.479371
1	Bulleidia	Incertae_sedis_family_Erysipelotrichaceae	0.402026
1	Bulleidia	Incertae_sedis_family_Lachnospiraceae	0.788098
1	Bulleidia	Leuconostoc	0.433248
1	Bulleidia	Megasphaera	0.638611
1	Bulleidia	otu_2066	-0.492772
1	Bulleidia	otu_2201	0.515786
1	Bulleidia	otu_4381	0.492164
1	Bulleidia	Pedobacter	0.616353
1	Bulleidia	Peptococcus	0.464557
1	Bulleidia	RFN20	-0.423699
1	Bulleidia	Ruminococcus_clade_2	0.543676
1	Bulleidia	Rummeliibacillus	0.495194
1	Bulleidia	Sarcina	-0.539258
1	Bulleidia	Subdoligranulum	0.570738
1	Bulleidia	Weissella	-0.42745
1	Bulleidia	Yersinia	0.506884
1	Butyrivibrio	Adlercreutzia	0.499629
1	Butyrivibrio	Aerococcus	0.449592
1	Butyrivibrio	Catenibacterium	0.655348
1	Butyrivibrio	Clostridium_clade_2	0.410195
1	Butyrivibrio	Clostridium_clade_3	0.529487
1	Butyrivibrio	Collinsella	0.53454
1	Butyrivibrio	Dehalobacterium	0.444437
1	Butyrivibrio	Dorea	0.625069
1	Butyrivibrio	Dysgonomonas	0.44126
1	Butyrivibrio	Eubacterium_clade_1	0.712558
1	Butyrivibrio	Faecalibacterium	0.629794
1	Butyrivibrio	Fibrobacter	0.580808
1	Butyrivibrio	Flavobacterium	0.483912
1	Butyrivibrio	Incertae_sedis_family_Lachnospiraceae	0.546746
1	Butyrivibrio	Megasphaera	0.441679
1	Butyrivibrio	otu_1033	0.409322
1	Butyrivibrio	otu_2066	-0.504818
1	Butyrivibrio	otu_2201	0.474945
1	Butyrivibrio	otu_4381	0.638497
1	Butyrivibrio	otu_915	0.414493
1	Butyrivibrio	p-75-a5	0.60447
1	Butyrivibrio	Parabacteroides	0.707524
1	Butyrivibrio	Pedobacter	0.602292
1	Butyrivibrio	Peptococcus	0.541593
1	Butyrivibrio	Pseudomonas	-0.417097
1	Butyrivibrio	Ruminococcus_clade_2	0.833753
1	Butyrivibrio	Rummeliibacillus	0.573148
1	Butyrivibrio	Sphingobacterium	-0.421414
1	Butyrivibrio	Subdoligranulum	0.551011
1	Butyrivibrio	Yersinia	0.410749
1	Campylobacter	otu_4182	0.520519
1	Catenibacterium	Clostridium_clade_2	0.423043
1	Catenibacterium	Clostridium_clade_3	0.517331
1	Catenibacterium	Collinsella	0.414695
1	Catenibacterium	Dehalobacterium	0.425773
1	Catenibacterium	Dorea	0.645317
1	Catenibacterium	Erysipelothrix	-0.478779
1	Catenibacterium	Megasphaera	0.423486
1	Catenibacterium	otu_2066	-0.402517
1	Catenibacterium	otu_2201	0.494878
1	Catenibacterium	otu_915	0.467447
1	Catenibacterium	RFN20	-0.542198
1	Catenibacterium	Rummeliibacillus	0.424369
1	Catenibacterium	Subdoligranulum	0.54862
1	Clostridium_clade_1	Aerococcus	-0.691787
1	Clostridium_clade_1	Blautia	-0.647823
1	Clostridium_clade_1	Bulleidia	-0.638264
1	Clostridium_clade_1	Butyrivibrio	-0.464028
1	Clostridium_clade_1	Catenibacterium	-0.499105
1	Clostridium_clade_1	Clostridium_clade_2	-0.485378
1	Clostridium_clade_1	Clostridium_clade_3	-0.555788
1	Clostridium_clade_1	Coprococcus	-0.437577
1	Clostridium_clade_1	Dehalobacterium	-0.649931
1	Clostridium_clade_1	Dialister	-0.452542
1	Clostridium_clade_1	Dorea	-0.677569
1	Clostridium_clade_1	Enterococcus	0.644354
1	Clostridium_clade_1	Eubacterium_clade_1	-0.433137
1	Clostridium_clade_1	Eubacterium_clade_3	-0.54325
1	Clostridium_clade_1	Faecalibacterium	-0.650709
1	Clostridium_clade_1	Flavobacterium	-0.551485
1	Clostridium_clade_1	Helicobacter	0.444005
1	Clostridium_clade_1	Incertae_sedis_family_Erysipelotrichaceae	-0.497816
1	Clostridium_clade_1	Incertae_sedis_family_Lachnospiraceae	-0.5634
1	Clostridium_clade_1	Kurthia	-0.416761
1	Clostridium_clade_1	Megasphaera	-0.540699
1	Clostridium_clade_1	otu_2066	0.662021
1	Clostridium_clade_1	otu_2087	-0.468442
1	Clostridium_clade_1	otu_2159	-0.523241
1	Clostridium_clade_1	otu_4182	0.653888
1	Clostridium_clade_1	otu_4381	-0.446066
1	Clostridium_clade_1	Pedobacter	-0.583856
1	Clostridium_clade_1	Peptococcus	-0.625815
1	Clostridium_clade_1	RFN20	0.423563
1	Clostridium_clade_1	Ruminococcus_clade_2	-0.525947
1	Clostridium_clade_1	Rummeliibacillus	-0.633197
1	Clostridium_clade_1	Sarcina	0.644479
1	Clostridium_clade_1	Subdoligranulum	-0.683926
1	Clostridium_clade_1	Treponema	0.424003
1	Clostridium_clade_1	Weissella	0.542505
1	Clostridium_clade_1	Yersinia	-0.588168
1	Clostridium_clade_2	Clostridium_clade_3	0.439609
1	Clostridium_clade_2	Dehalobacterium	0.572142
1	Clostridium_clade_2	Dorea	0.467225
1	Clostridium_clade_2	Erysipelothrix	0.425855
1	Clostridium_clade_2	Eubacterium_clade_3	0.446909
1	Clostridium_clade_2	otu_4182	-0.603447
1	Clostridium_clade_2	Psychrobacter	0.494704
1	Clostridium_clade_2	RFN20	-0.408904
1	Clostridium_clade_2	Subdoligranulum	0.553825
1	Clostridium_clade_2	Trichococcus	0.411224
1	Clostridium_clade_3	Campylobacter	-0.441948
1	Clostridium_clade_3	otu_4182	-0.532978
1	Collinsella	Desulfovibrio	0.403615
1	Collinsella	Fibrobacter	0.450031
1	Collinsella	otu_4182	0.423269
1	Comamonas	Acinetobacter	0.481786
1	Comamonas	Aerococcus	0.449319
1	Comamonas	Brachyspira	0.429663
1	Comamonas	Campylobacter	0.549879
1	Comamonas	Dysgonomonas	0.539667
1	Comamonas	Erysipelothrix	0.45357
1	Comamonas	Flavobacterium	0.528993
1	Comamonas	Lachnospira	-0.50702
1	Comamonas	Lactococcus	0.646398
1	Comamonas	otu_2201	0.440465
1	Comamonas	Paludibacter	0.572909
1	Comamonas	Psychrobacter	0.516566
1	Comamonas	RFN20	0.408199
1	Comamonas	Roseburia	-0.457196
1	Comamonas	Sphingobacterium	0.529779
1	Comamonas	Trichococcus	0.599752
1	Comamonas	Yersinia	0.622236
1	Coprococcus	Aerococcus	0.427062
1	Coprococcus	Campylobacter	-0.451754
1	Coprococcus	Clostridium_clade_3	0.459124
1	Coprococcus	Dialister	0.530689
1	Coprococcus	Dorea	0.553239
1	Coprococcus	Erysipelothrix	-0.542103
1	Coprococcus	Helicobacter	-0.544298
1	Coprococcus	Megasphaera	0.506094
1	Coprococcus	otu_915	0.476702
1	Coprococcus	Paludibacter	-0.410225
1	Coprococcus	RFN20	-0.444221
1	Coprococcus	Ruminococcus_clade_2	0.403207
1	Coprococcus	Subdoligranulum	0.527762
1	Coprococcus	Weissella	0.486427
1	Dehalobacterium	otu_4182	-0.49864
1	Desulfovibrio	Campylobacter	0.671437
1	Desulfovibrio	Clostridium_clade_3	-0.570598
1	Desulfovibrio	otu_4182	0.506917
1	Dialister	Aerococcus	0.517586
1	Dialister	Catenibacterium	0.413144
1	Dialister	Clostridium_clade_3	0.531781
1	Dialister	Dehalobacterium	0.61969
1	Dialister	Desulfovibrio	-0.45453
1	Dialister	Dorea	0.660227
1	Dialister	Eubacterium_clade_1	0.464606
1	Dialister	Faecalibacterium	0.413527
1	Dialister	Helicobacter	-0.516368
1	Dialister	Lactococcus	-0.526761
1	Dialister	Megasphaera	0.801175
1	Dialister	otu_2201	0.401636
1	Dialister	otu_4182	-0.513681
1	Dialister	Paludibacter	-0.467298
1	Dialister	RFN20	-0.595765
1	Dialister	Ruminococcus_clade_2	0.447104
1	Dialister	Rummeliibacillus	0.520993
1	Dialister	Sphaerochaeta	-0.41845
1	Dialister	Sphingobacterium	-0.405351
1	Dialister	Subdoligranulum	0.596085
1	Dorea	Clostridium_clade_3	0.568122
1	Dorea	Dehalobacterium	0.700349
1	Dorea	Eubacterium_clade_3	0.411441
1	Dorea	Fibrobacter	0.517647
1	Dorea	otu_4182	-0.455896
1	Dorea	RFN20	-0.504812
1	Dorea	Subdoligranulum	0.721767
1	Dysgonomonas	Acinetobacter	0.652029
1	Dysgonomonas	Brachyspira	0.640256
1	Dysgonomonas	Campylobacter	0.574964
1	Dysgonomonas	Clostridium_clade_2	0.427637
1	Dysgonomonas	Collinsella	0.480981
1	Dysgonomonas	Desulfovibrio	0.457609
1	Dysgonomonas	Erysipelothrix	0.523165
1	Dysgonomonas	Fibrobacter	0.447993
1	Dysgonomonas	otu_1033	0.559241
1	Dysgonomonas	Paludibacter	0.680623
1	Dysgonomonas	Psychrobacter	0.477889
1	Dysgonomonas	RFN20	0.484046
1	Dysgonomonas	Sphingobacterium	0.462429
1	Dysgonomonas	Trichococcus	0.538241
1	Enterococcus	Adlercreutzia	0.603131
1	Enterococcus	Aerococcus	-0.507455
1	Enterococcus	Campylobacter	0.552022
1	Enterococcus	Catenibacterium	-0.408226
1	Enterococcus	Clostridium_clade_2	-0.484593
1	Enterococcus	Clostridium_clade_3	-0.512978
1	Enterococcus	Collinsella	0.477814
1	Enterococcus	Comamonas	0.403353
1	Enterococcus	Dehalobacterium	-0.53573
1	Enterococcus	Desulfovibrio	0.559996
1	Enterococcus	Dialister	-0.556085
1	Enterococcus	Dorea	-0.428253
1	Enterococcus	Faecalibacterium	-0.451818
1	Enterococcus	Helicobacter	0.629196
1	Enterococcus	Kurthia	-0.476436
1	Enterococcus	Lactococcus	0.403617
1	Enterococcus	Megasphaera	-0.53844
1	Enterococcus	Oscillospira	-0.459704
1	Enterococcus	otu_2066	0.469268
1	Enterococcus	otu_4182	0.791495
1	Enterococcus	p-75-a5	0.403829
1	Enterococcus	Paludibacter	0.663686
1	Enterococcus	RFN20	0.633967
1	Enterococcus	Rummeliibacillus	-0.601851
1	Enterococcus	Sarcina	0.5437
1	Enterococcus	Sphaerochaeta	0.502064
1	Enterococcus	Sphingobacterium	0.462578
1	Enterococcus	Subdoligranulum	-0.633168
1	Enterococcus	Treponema	0.536944
1	Erysipelothrix	Brachyspira	0.541143
1	Erysipelothrix	Clostridium_clade_3	-0.455024
1	Erysipelothrix	Dorea	-0.454997
1	Erysipelothrix	Helicobacter	0.558043
1	Erysipelothrix	Psychrobacter	0.604893
1	Erysipelothrix	RFN20	0.587149
1	Erysipelothrix	Subdoligranulum	-0.41286
1	Erysipelothrix	Trichococcus	0.527623
1	Eubacterium_clade_1	Acinetobacter	0.434644
1	Eubacterium_clade_1	Adlercreutzia	0.488168
1	Eubacterium_clade_1	Aerococcus	0.590026
1	Eubacterium_clade_1	Catenibacterium	0.481529
1	Eubacterium_clade_1	Clostridium_clade_2	0.533363
1	Eubacterium_clade_1	Collinsella	0.509875
1	Eubacterium_clade_1	Dehalobacterium	0.597123
1	Eubacterium_clade_1	Dorea	0.579546
1	Eubacterium_clade_1	Dysgonomonas	0.43291
1	Eubacterium_clade_1	Faecalibacterium	0.731335
1	Eubacterium_clade_1	Fibrobacter	0.697814
1	Eubacterium_clade_1	Kurthia	0.4063
1	Eubacterium_clade_1	Megasphaera	0.549651
1	Eubacterium_clade_1	otu_1033	0.57746
1	Eubacterium_clade_1	otu_2066	-0.649977
1	Eubacterium_clade_1	otu_2201	0.700338
1	Eubacterium_clade_1	Paludibacter	0.437827
1	Eubacterium_clade_1	Parabacteroides	0.726078
1	Eubacterium_clade_1	Pedobacter	0.65591
1	Eubacterium_clade_1	Peptococcus	0.641913
1	Eubacterium_clade_1	Pseudomonas	-0.467843
1	Eubacterium_clade_1	Rummeliibacillus	0.678357
1	Eubacterium_clade_1	Subdoligranulum	0.565846
1	Eubacterium_clade_3	Dehalobacterium	0.574789
1	Eubacterium_clade_3	Kurthia	0.432348
1	Eubacterium_clade_3	Subdoligranulum	0.490141
1	Faecalibacterium	Catenibacterium	0.494452
1	Faecalibacterium	Clostridium_clade_2	0.552345
1	Faecalibacterium	Clostridium_clade_3	0.632824
1	Faecalibacterium	Dehalobacterium	0.566921
1	Faecalibacterium	Dorea	0.585092
1	Faecalibacterium	Eubacterium_clade_3	0.418176
1	Faecalibacterium	Fibrobacter	0.608793
1	Faecalibacterium	Helicobacter	-0.463696
1	Faecalibacterium	Megasphaera	0.529936
1	Faecalibacterium	otu_1033	0.415531
1	Faecalibacterium	otu_2066	-0.836748
1	Faecalibacterium	otu_2201	0.502974
1	Faecalibacterium	otu_4182	-0.405656
1	Faecalibacterium	Parabacteroides	0.431367
1	Faecalibacterium	Peptococcus	0.724233
1	Faecalibacterium	Pseudomonas	-0.438488
1	Faecalibacterium	Rummeliibacillus	0.723171
1	Faecalibacterium	Sphingobacterium	-0.506723
1	Faecalibacterium	Subdoligranulum	0.73608
1	Fibrobacter	Dehalobacterium	0.48025
1	Flavobacterium	Acinetobacter	0.453274
1	Flavobacterium	Aerococcus	0.526848
1	Flavobacterium	Brachyspira	0.519436
1	Flavobacterium	Campylobacter	0.402925
1	Flavobacterium	Clostridium_clade_2	0.644319
1	Flavobacterium	Collinsella	0.448499
1	Flavobacterium	Dehalobacterium	0.439417
1	Flavobacterium	Desulfovibrio	0.433397
1	Flavobacterium	Dorea	0.412234
1	Flavobacterium	Dysgonomonas	0.632767
1	Flavobacterium	Erysipelothrix	0.558614
1	Flavobacterium	Eubacterium_clade_1	0.542492
1	Flavobacterium	Faecalibacterium	0.477432
1	Flavobacterium	Incertae_sedis_family_Lachnospiraceae	0.529994
1	Flavobacterium	Lactococcus	0.449778
1	Flavobacterium	otu_1033	0.407204
1	Flavobacterium	otu_2066	-0.438797
1	Flavobacterium	otu_2201	0.611616
1	Flavobacterium	Paludibacter	0.494476
1	Flavobacterium	Pedobacter	0.779102
1	Flavobacterium	Peptococcus	0.601533
1	Flavobacterium	Psychrobacter	0.583144
1	Flavobacterium	Ruminococcus_clade_2	0.593288
1	Flavobacterium	Rummeliibacillus	0.522615
1	Flavobacterium	Sphingobacterium	0.532858
1	Flavobacterium	Subdoligranulum	0.41849
1	Flavobacterium	Trichococcus	0.448494
1	Flavobacterium	Yersinia	0.756958
1	Helicobacter	Brachyspira	0.480858
1	Helicobacter	Campylobacter	0.697546
1	Helicobacter	Clostridium_clade_3	-0.586888
1	Helicobacter	Desulfovibrio	0.69008
1	Helicobacter	Eubacterium_clade_3	-0.411749
1	Helicobacter	Kurthia	-0.450853
1	Helicobacter	otu_4182	0.568562
1	Helicobacter	RFN20	0.590512
1	Helicobacter	Subdoligranulum	-0.545542
1	Incertae_sedis_family_Erysipelotrichaceae	Acinetobacter	0.475721
1	Incertae_sedis_family_Erysipelotrichaceae	Adlercreutzia	0.511051
1	Incertae_sedis_family_Erysipelotrichaceae	Aerococcus	0.536702
1	Incertae_sedis_family_Erysipelotrichaceae	Blautia	0.507104
1	Incertae_sedis_family_Erysipelotrichaceae	Brachyspira	0.446673
1	Incertae_sedis_family_Erysipelotrichaceae	Butyrivibrio	0.521447
1	Incertae_sedis_family_Erysipelotrichaceae	Catenibacterium	0.51319
1	Incertae_sedis_family_Erysipelotrichaceae	Dehalobacterium	0.50693
1	Incertae_sedis_family_Erysipelotrichaceae	Dorea	0.615834
1	Incertae_sedis_family_Erysipelotrichaceae	Dysgonomonas	0.533709
1	Incertae_sedis_family_Erysipelotrichaceae	Eubacterium_clade_1	0.508314
1	Incertae_sedis_family_Erysipelotrichaceae	Faecalibacterium	0.437643
1	Incertae_sedis_family_Erysipelotrichaceae	Fibrobacter	0.53078
1	Incertae_sedis_family_Erysipelotrichaceae	Incertae_sedis_family_Lachnospiraceae	0.495948
1	Incertae_sedis_family_Erysipelotrichaceae	otu_2066	-0.499538
1	Incertae_sedis_family_Erysipelotrichaceae	otu_2201	0.429369
1	Incertae_sedis_family_Erysipelotrichaceae	otu_4381	0.411336
1	Incertae_sedis_family_Erysipelotrichaceae	Parabacteroides	0.438374
1	Incertae_sedis_family_Erysipelotrichaceae	Peptococcus	0.405582
1	Incertae_sedis_family_Erysipelotrichaceae	Pseudomonas	-0.473135
1	Incertae_sedis_family_Erysipelotrichaceae	Roseburia	-0.488461
1	Incertae_sedis_family_Erysipelotrichaceae	Ruminococcus_clade_2	0.559112
1	Incertae_sedis_family_Erysipelotrichaceae	Yersinia	0.569895
1	Incertae_sedis_family_Lachnospiraceae	Acinetobacter	0.423612
1	Incertae_sedis_family_Lachnospiraceae	Aerococcus	0.705595
1	Incertae_sedis_family_Lachnospiraceae	Clostridium_clade_2	0.454114
1	Incertae_sedis_family_Lachnospiraceae	Collinsella	0.412181
1	Incertae_sedis_family_Lachnospiraceae	Dehalobacterium	0.677802
1	Incertae_sedis_family_Lachnospiraceae	Desulfovibrio	0.44947
1	Incertae_sedis_family_Lachnospiraceae	Dorea	0.60053
1	Incertae_sedis_family_Lachnospiraceae	Eubacterium_clade_1	0.655875
1	Incertae_sedis_family_Lachnospiraceae	Eubacterium_clade_3	0.680529
1	Incertae_sedis_family_Lachnospiraceae	Faecalibacterium	0.608978
1	Incertae_sedis_family_Lachnospiraceae	Fibrobacter	0.53398
1	Incertae_sedis_family_Lachnospiraceae	Kurthia	0.413639
1	Incertae_sedis_family_Lachnospiraceae	Lachnospira	-0.45515
1	Incertae_sedis_family_Lachnospiraceae	Megasphaera	0.574931
1	Incertae_sedis_family_Lachnospiraceae	otu_2066	-0.612849
1	Incertae_sedis_family_Lachnospiraceae	otu_2201	0.581227
1	Incertae_sedis_family_Lachnospiraceae	Parabacteroides	0.439922
1	Incertae_sedis_family_Lachnospiraceae	Pedobacter	0.63364
1	Incertae_sedis_family_Lachnospiraceae	Peptococcus	0.515064
1	Incertae_sedis_family_Lachnospiraceae	Ruminococcus_clade_2	0.626242
1	Incertae_sedis_family_Lachnospiraceae	Rummeliibacillus	0.55439
1	Incertae_sedis_family_Lachnospiraceae	Sphaerochaeta	0.476516
1	Incertae_sedis_family_Lachnospiraceae	Subdoligranulum	0.557857
1	Incertae_sedis_family_Lachnospiraceae	Yersinia	0.627969
1	Kurthia	Dehalobacterium	0.462394
1	Lachnospira	Campylobacter	-0.523825
1	Lachnospira	Dehalobacterium	-0.469874
1	Lachnospira	Fibrobacter	-0.444285
1	Lachnospira	Helicobacter	-0.470897
1	Lactobacillus	Adlercreutzia	-0.743846
1	Lactobacillus	Butyrivibrio	-0.419664
1	Lactobacillus	Campylobacter	-0.502171
1	Lactobacillus	Collinsella	-0.618574
1	Lactobacillus	Comamonas	-0.44695
1	Lactobacillus	Dysgonomonas	-0.507276
1	Lactobacillus	Enterococcus	-0.631673
1	Lactobacillus	Eubacterium_clade_1	-0.50924
1	Lactobacillus	Fibrobacter	-0.497589
1	Lactobacillus	Helicobacter	-0.489129
1	Lactobacillus	Leuconostoc	-0.403094
1	Lactobacillus	Oscillospira	0.585976
1	Lactobacillus	otu_1033	-0.68831
1	Lactobacillus	otu_2159	-0.41284
1	Lactobacillus	otu_2201	-0.563264
1	Lactobacillus	otu_4182	-0.517696
1	Lactobacillus	otu_4381	-0.416729
1	Lactobacillus	otu_915	-0.447649
1	Lactobacillus	p-75-a5	-0.535253
1	Lactobacillus	Paludibacter	-0.707201
1	Lactobacillus	Parabacteroides	-0.721987
1	Lactobacillus	Prevotella	-0.606008
1	Lactobacillus	Pseudomonas	0.433634
1	Lactobacillus	RFN20	-0.410433
1	Lactobacillus	Ruminococcus_clade_2	-0.45347
1	Lactobacillus	Treponema	-0.766272
1	Lactococcus	Brachyspira	0.448365
1	Lactococcus	Campylobacter	0.472052
1	Lactococcus	Clostridium_clade_3	-0.470711
1	Lactococcus	Desulfovibrio	0.421062
1	Lactococcus	Erysipelothrix	0.637126
1	Lactococcus	Helicobacter	0.48943
1	Lactococcus	Megasphaera	-0.45115
1	Lactococcus	otu_2201	0.410356
1	Lactococcus	Paludibacter	0.589535
1	Lactococcus	Psychrobacter	0.558311
1	Lactococcus	RFN20	0.684168
1	Lactococcus	Sphaerochaeta	0.526302
1	Lactococcus	Sphingobacterium	0.627374
1	Lactococcus	Subdoligranulum	-0.475743
1	Lactococcus	Trichococcus	0.540803
1	Leuconostoc	Acinetobacter	0.46514
1	Leuconostoc	Blautia	0.496184
1	Leuconostoc	Comamonas	0.410443
1	Leuconostoc	Dysgonomonas	0.572916
1	Leuconostoc	Erysipelothrix	0.580314
1	Leuconostoc	Flavobacterium	0.499305
1	Leuconostoc	otu_2201	0.417136
1	Leuconostoc	Pedobacter	0.535656
1	Leuconostoc	Psychrobacter	0.515802
1	Leuconostoc	Sphingobacterium	0.543072
1	Leuconostoc	Weissella	-0.512636
1	Leuconostoc	Yersinia	0.429994
1	LPS_IgA_fold	Adlercreutzia	0.528167
1	LPS_IgA_fold	Brachyspira	-0.447872
1	LPS_IgA_fold	Clostridium_clade_1	0.508085
1	LPS_IgA_fold	Enterococcus	0.542163
1	LPS_IgA_fold	Flavobacterium	-0.452493
1	LPS_IgA_fold	Lactobacillus	-0.541595
1	LPS_IgA_fold	Leuconostoc	-0.463657
1	LPS_IgA_fold	LPS_IgG_fold	0.957637
1	LPS_IgA_fold	otu_1998	0.492539
1	LPS_IgA_fold	otu_4182	0.414377
1	LPS_IgA_fold	otu_915	0.466486
1	LPS_IgA_fold	Pedobacter	-0.464148
1	LPS_IgA_fold	Pseudomonas	-0.430423
1	LPS_IgA_fold	Psychrobacter	-0.547309
1	LPS_IgA_fold	Sphingobacterium	-0.424018
1	LPS_IgA_fold	Weissella	0.533801
1	LPS_IgA_fold	Yersinia	-0.450125
1	LPS_IgG_fold	Adlercreutzia	0.539605
1	LPS_IgG_fold	Clostridium_clade_1	0.515802
1	LPS_IgG_fold	Enterococcus	0.545666
1	LPS_IgG_fold	Fibrobacter	0.400358
1	LPS_IgG_fold	Flavobacterium	-0.47891
1	LPS_IgG_fold	Lactobacillus	-0.576907
1	LPS_IgG_fold	Leuconostoc	-0.449693
1	LPS_IgG_fold	Oscillospira	-0.445369
1	LPS_IgG_fold	otu_1998	0.413063
1	LPS_IgG_fold	otu_4182	0.483057
1	LPS_IgG_fold	otu_915	0.563028
1	LPS_IgG_fold	Pedobacter	-0.469919
1	LPS_IgG_fold	Pseudomonas	-0.473623
1	LPS_IgG_fold	Psychrobacter	-0.568671
1	LPS_IgG_fold	Sphingobacterium	-0.43506
1	LPS_IgG_fold	Weissella	0.567278
1	LPS_IgG_fold	Yersinia	-0.441474
1	Megasphaera	Clostridium_clade_2	0.482049
1	Megasphaera	Clostridium_clade_3	0.501006
1	Megasphaera	Dehalobacterium	0.729831
1	Megasphaera	Dorea	0.718853
1	Megasphaera	Fibrobacter	0.421035
1	Megasphaera	otu_4182	-0.502728
1	Megasphaera	RFN20	-0.612569
1	Megasphaera	Subdoligranulum	0.668598
1	Oscillospira	Adlercreutzia	-0.586248
1	Oscillospira	Campylobacter	-0.415063
1	Oscillospira	Collinsella	-0.593353
1	Oscillospira	otu_1033	-0.450764
1	Oscillospira	otu_2201	-0.507191
1	Oscillospira	otu_4182	-0.457917
1	Oscillospira	otu_915	-0.559983
1	Oscillospira	Parabacteroides	-0.434096
1	Oscillospira	Pseudomonas	0.611078
1	otu_1033	Acinetobacter	0.435286
1	otu_1033	Brachyspira	0.407086
1	otu_1033	Campylobacter	0.475404
1	otu_1033	Erysipelothrix	0.422999
1	otu_1033	Fibrobacter	0.686362
1	otu_1033	Helicobacter	0.42648
1	otu_1033	Lachnospira	-0.492263
1	otu_1998	Brachyspira	-0.422354
1	otu_1998	Erysipelothrix	-0.477585
1	otu_1998	Pedobacter	-0.415964
1	otu_1998	Roseburia	-0.503331
1	otu_2066	Clostridium_clade_2	-0.506818
1	otu_2066	Clostridium_clade_3	-0.491361
1	otu_2066	Dehalobacterium	-0.555664
1	otu_2066	Dorea	-0.553493
1	otu_2066	Eubacterium_clade_3	-0.512409
1	otu_2066	Fibrobacter	-0.582468
1	otu_2066	Helicobacter	0.403421
1	otu_2066	Kurthia	-0.476357
1	otu_2066	Megasphaera	-0.467216
1	otu_2066	otu_1033	-0.401051
1	otu_2066	otu_2201	-0.48314
1	otu_2066	Rummeliibacillus	-0.647694
1	otu_2066	Sphingobacterium	0.453734
1	otu_2066	Subdoligranulum	-0.682054
1	otu_2087	Aerococcus	0.521797
1	otu_2087	Blautia	0.408701
1	otu_2087	Bulleidia	0.494427
1	otu_2087	Butyrivibrio	0.577113
1	otu_2087	Catenibacterium	0.439744
1	otu_2087	Clostridium_clade_2	0.461101
1	otu_2087	Clostridium_clade_3	0.576648
1	otu_2087	Collinsella	0.427843
1	otu_2087	Coprococcus	0.421494
1	otu_2087	Dehalobacterium	0.497541
1	otu_2087	Dialister	0.470214
1	otu_2087	Dorea	0.544169
1	otu_2087	Eubacterium_clade_1	0.695814
1	otu_2087	Faecalibacterium	0.598303
1	otu_2087	Fibrobacter	0.600389
1	otu_2087	Flavobacterium	0.519232
1	otu_2087	Incertae_sedis_family_Erysipelotrichaceae	0.453391
1	otu_2087	Incertae_sedis_family_Lachnospiraceae	0.53016
1	otu_2087	Megasphaera	0.545634
1	otu_2087	Oscillospira	-0.416155
1	otu_2087	otu_2066	-0.502479
1	otu_2087	otu_2201	0.526478
1	otu_2087	Parabacteroides	0.460408
1	otu_2087	Pedobacter	0.545085
1	otu_2087	Peptococcus	0.691185
1	otu_2087	Ruminococcus_clade_1	0.525075
1	otu_2087	Ruminococcus_clade_2	0.639238
1	otu_2087	Rummeliibacillus	0.542564
1	otu_2087	Sarcina	-0.62458
1	otu_2087	Subdoligranulum	0.543254
1	otu_2087	Yersinia	0.451394
1	otu_2159	Adlercreutzia	0.404649
1	otu_2159	Aerococcus	0.637007
1	otu_2159	Blautia	0.612491
1	otu_2159	Bulleidia	0.519025
1	otu_2159	Butyrivibrio	0.620137
1	otu_2159	Clostridium_clade_2	0.587849
1	otu_2159	Clostridium_clade_3	0.454648
1	otu_2159	Dehalobacterium	0.713793
1	otu_2159	Dialister	0.476595
1	otu_2159	Dorea	0.68654
1	otu_2159	Eubacterium_clade_1	0.783963
1	otu_2159	Eubacterium_clade_3	0.408314
1	otu_2159	Faecalibacterium	0.708953
1	otu_2159	Fibrobacter	0.668071
1	otu_2159	Flavobacterium	0.488068
1	otu_2159	Incertae_sedis_family_Erysipelotrichaceae	0.530713
1	otu_2159	Incertae_sedis_family_Lachnospiraceae	0.746495
1	otu_2159	Kurthia	0.427182
1	otu_2159	Megasphaera	0.637064
1	otu_2159	otu_1033	0.501197
1	otu_2159	otu_2066	-0.655016
1	otu_2159	otu_2087	0.647636
1	otu_2159	otu_2201	0.484702
1	otu_2159	otu_4381	0.676321
1	otu_2159	p-75-a5	0.450687
1	otu_2159	Parabacteroides	0.54165
1	otu_2159	Pedobacter	0.598727
1	otu_2159	Peptococcus	0.630819
1	otu_2159	Pseudomonas	-0.43182
1	otu_2159	Ruminococcus_clade_1	0.507562
1	otu_2159	Ruminococcus_clade_2	0.778101
1	otu_2159	Rummeliibacillus	0.729883
1	otu_2159	Sarcina	-0.569357
1	otu_2159	Subdoligranulum	0.640688
1	otu_2159	Weissella	-0.456705
1	otu_2159	Yersinia	0.537477
1	otu_2201	Acinetobacter	0.574438
1	otu_2201	Brachyspira	0.48345
1	otu_2201	Clostridium_clade_2	0.52832
1	otu_2201	Collinsella	0.496659
1	otu_2201	Dehalobacterium	0.419077
1	otu_2201	Dorea	0.482239
1	otu_2201	Dysgonomonas	0.601497
1	otu_2201	Erysipelothrix	0.52719
1	otu_2201	Eubacterium_clade_3	0.480325
1	otu_2201	Fibrobacter	0.479772
1	otu_2201	Lachnospira	-0.405461
1	otu_2201	otu_1033	0.61086
1	otu_2201	Paludibacter	0.5009
1	otu_2201	Parabacteroides	0.526223
1	otu_2201	Rummeliibacillus	0.46178
1	otu_2201	Subdoligranulum	0.422475
1	otu_2201	Trichococcus	0.544544
1	otu_4381	Adlercreutzia	0.419202
1	otu_4381	Aerococcus	0.533262
1	otu_4381	Catenibacterium	0.513522
1	otu_4381	Clostridium_clade_2	0.586384
1	otu_4381	Clostridium_clade_3	0.426231
1	otu_4381	Dehalobacterium	0.521179
1	otu_4381	Dorea	0.636233
1	otu_4381	Eubacterium_clade_1	0.591862
1	otu_4381	Eubacterium_clade_3	0.500417
1	otu_4381	Faecalibacterium	0.584931
1	otu_4381	Flavobacterium	0.508269
1	otu_4381	Incertae_sedis_family_Lachnospiraceae	0.571663
1	otu_4381	Megasphaera	0.433507
1	otu_4381	otu_2066	-0.474614
1	otu_4381	otu_2201	0.455677
1	otu_4381	Parabacteroides	0.432059
1	otu_4381	Pedobacter	0.509661
1	otu_4381	Peptococcus	0.506692
1	otu_4381	Ruminococcus_clade_2	0.766803
1	otu_4381	Rummeliibacillus	0.682455
1	otu_4381	Subdoligranulum	0.585916
1	otu_4381	Yersinia	0.418279
1	otu_915	Clostridium_clade_3	0.517116
1	otu_915	Fibrobacter	0.413113
1	p-75-a5	Adlercreutzia	0.610305
1	p-75-a5	Collinsella	0.552053
1	p-75-a5	Desulfovibrio	0.402845
1	p-75-a5	Dysgonomonas	0.454728
1	p-75-a5	Eubacterium_clade_1	0.499857
1	p-75-a5	Flavobacterium	0.444528
1	p-75-a5	otu_1033	0.428205
1	p-75-a5	otu_2201	0.411135
1	p-75-a5	otu_4381	0.543868
1	p-75-a5	Paludibacter	0.491027
1	p-75-a5	Parabacteroides	0.576265
1	p-75-a5	Peptococcus	0.568578
1	p-75-a5	Ruminococcus_clade_2	0.56298
1	Paludibacter	Acinetobacter	0.459916
1	Paludibacter	Brachyspira	0.479056
1	Paludibacter	Campylobacter	0.784711
1	Paludibacter	Clostridium_clade_3	-0.47569
1	Paludibacter	Collinsella	0.529089
1	Paludibacter	Desulfovibrio	0.669155
1	Paludibacter	Erysipelothrix	0.465582
1	Paludibacter	Helicobacter	0.608731
1	Paludibacter	otu_1033	0.604547
1	Paludibacter	otu_4182	0.580361
1	Paludibacter	RFN20	0.76463
1	Paludibacter	Sphaerochaeta	0.564113
1	Paludibacter	Subdoligranulum	-0.527377
1	Paludibacter	Trichococcus	0.400066
1	Parabacteroides	Acinetobacter	0.408527
1	Parabacteroides	Campylobacter	0.487068
1	Parabacteroides	Collinsella	0.608853
1	Parabacteroides	Desulfovibrio	0.440052
1	Parabacteroides	Dysgonomonas	0.480256
1	Parabacteroides	Fibrobacter	0.64136
1	Parabacteroides	Helicobacter	0.401131
1	Parabacteroides	otu_1033	0.713561
1	Parabacteroides	Paludibacter	0.595853
1	Parabacteroides	Rummeliibacillus	0.41257
1	Pedobacter	Clostridium_clade_2	0.54668
1	Pedobacter	Clostridium_clade_3	0.490997
1	Pedobacter	Collinsella	0.505844
1	Pedobacter	Dehalobacterium	0.430354
1	Pedobacter	Dorea	0.491959
1	Pedobacter	Dysgonomonas	0.503193
1	Pedobacter	Erysipelothrix	0.4587
1	Pedobacter	Eubacterium_clade_3	0.401951
1	Pedobacter	Faecalibacterium	0.569834
1	Pedobacter	Fibrobacter	0.497125
1	Pedobacter	Megasphaera	0.488445
1	Pedobacter	otu_2066	-0.557079
1	Pedobacter	otu_2201	0.608956
1	Pedobacter	Paludibacter	0.424501
1	Pedobacter	Parabacteroides	0.480023
1	Pedobacter	Peptococcus	0.529528
1	Pedobacter	Psychrobacter	0.438299
1	Pedobacter	Rummeliibacillus	0.645331
1	Pedobacter	Sphingobacterium	0.467431
1	Pedobacter	Subdoligranulum	0.526036
1	Peptococcus	Clostridium_clade_2	0.601125
1	Peptococcus	Clostridium_clade_3	0.54347
1	Peptococcus	Dehalobacterium	0.442344
1	Peptococcus	Dorea	0.48193
1	Peptococcus	Fibrobacter	0.502676
1	Peptococcus	Megasphaera	0.429722
1	Peptococcus	otu_1033	0.427029
1	Peptococcus	otu_2066	-0.653949
1	Peptococcus	otu_2201	0.509726
1	Peptococcus	otu_4182	-0.413832
1	Peptococcus	Rummeliibacillus	0.646914
1	Peptococcus	Subdoligranulum	0.540674
1	Prevotella	Adlercreutzia	0.647932
1	Prevotella	Butyrivibrio	0.687582
1	Prevotella	Catenibacterium	0.529329
1	Prevotella	Collinsella	0.526599
1	Prevotella	Dorea	0.423261
1	Prevotella	Eubacterium_clade_1	0.654364
1	Prevotella	Faecalibacterium	0.460336
1	Prevotella	Fibrobacter	0.593228
1	Prevotella	Incertae_sedis_family_Erysipelotrichaceae	0.44738
1	Prevotella	Oscillospira	-0.599363
1	Prevotella	otu_1033	0.590274
1	Prevotella	otu_2087	0.553931
1	Prevotella	otu_2159	0.425097
1	Prevotella	otu_2201	0.570146
1	Prevotella	otu_915	0.576528
1	Prevotella	p-75-a5	0.48444
1	Prevotella	Parabacteroides	0.747955
1	Prevotella	Pedobacter	0.423253
1	Prevotella	Pseudomonas	-0.543384
1	Prevotella	Psychrobacter	-0.401021
1	Prevotella	Ruminococcus_clade_2	0.612674
1	Prevotella	Rummeliibacillus	0.425187
1	Prevotella	Sarcina	-0.51033
1	Prevotella	Treponema	0.492311
1	Pseudomonas	Adlercreutzia	-0.562397
1	Pseudomonas	Catenibacterium	-0.541357
1	Pseudomonas	Dorea	-0.460277
1	Pseudomonas	Fibrobacter	-0.641357
1	Pseudomonas	otu_1033	-0.499321
1	Pseudomonas	otu_2201	-0.475325
1	Pseudomonas	otu_915	-0.567907
1	Pseudomonas	Parabacteroides	-0.472153
1	Pseudomonas	Psychrobacter	0.478188
1	Pseudomonas	Sphingobacterium	0.460771
1	Psychrobacter	Brachyspira	0.446807
1	Psychrobacter	Fibrobacter	-0.43287
1	Psychrobacter	otu_915	-0.459457
1	Psychrobacter	RFN20	0.418322
1	Psychrobacter	Trichococcus	0.630255
1	RFN20	Campylobacter	0.574946
1	RFN20	Clostridium_clade_3	-0.708569
1	RFN20	Dehalobacterium	-0.455676
1	RFN20	Desulfovibrio	0.614463
1	RFN20	otu_4182	0.561886
1	Roseburia	Dehalobacterium	-0.459522
1	Roseburia	Desulfovibrio	-0.514286
1	Roseburia	Helicobacter	-0.439691
1	Roseburia	Lachnospira	0.447815
1	Roseburia	Sphaerochaeta	-0.541629
1	Ruminococcus_clade_1	Dialister	0.419276
1	Ruminococcus_clade_1	Eubacterium_clade_1	0.474866
1	Ruminococcus_clade_1	Eubacterium_clade_3	-0.429413
1	Ruminococcus_clade_1	Fibrobacter	0.433803
1	Ruminococcus_clade_1	Lachnospira	-0.419842
1	Ruminococcus_clade_1	Megasphaera	0.46761
1	Ruminococcus_clade_1	Psychrobacter	-0.407257
1	Ruminococcus_clade_1	Rummeliibacillus	0.446026
1	Ruminococcus_clade_1	Sphingobacterium	-0.464937
1	Ruminococcus_clade_2	Adlercreutzia	0.46911
1	Ruminococcus_clade_2	Aerococcus	0.54906
1	Ruminococcus_clade_2	Catenibacterium	0.481689
1	Ruminococcus_clade_2	Clostridium_clade_2	0.48471
1	Ruminococcus_clade_2	Clostridium_clade_3	0.576022
1	Ruminococcus_clade_2	Collinsella	0.449777
1	Ruminococcus_clade_2	Dehalobacterium	0.553463
1	Ruminococcus_clade_2	Dorea	0.700809
1	Ruminococcus_clade_2	Dysgonomonas	0.463823
1	Ruminococcus_clade_2	Eubacterium_clade_1	0.768413
1	Ruminococcus_clade_2	Faecalibacterium	0.719281
1	Ruminococcus_clade_2	Fibrobacter	0.650352
1	Ruminococcus_clade_2	Megasphaera	0.510653
1	Ruminococcus_clade_2	otu_1033	0.465316
1	Ruminococcus_clade_2	otu_2066	-0.622335
1	Ruminococcus_clade_2	otu_2201	0.5347
1	Ruminococcus_clade_2	Parabacteroides	0.611002
1	Ruminococcus_clade_2	Pedobacter	0.712864
1	Ruminococcus_clade_2	Peptococcus	0.632972
1	Ruminococcus_clade_2	Pseudomonas	-0.409063
1	Ruminococcus_clade_2	Rummeliibacillus	0.723869
1	Ruminococcus_clade_2	Subdoligranulum	0.613557
1	Rummeliibacillus	Acinetobacter	0.497612
1	Rummeliibacillus	Clostridium_clade_2	0.703516
1	Rummeliibacillus	Clostridium_clade_3	0.579087
1	Rummeliibacillus	Dehalobacterium	0.577484
1	Rummeliibacillus	Dorea	0.589781
1	Rummeliibacillus	Eubacterium_clade_3	0.447208
1	Rummeliibacillus	Fibrobacter	0.448579
1	Rummeliibacillus	Helicobacter	-0.470924
1	Rummeliibacillus	Kurthia	0.566035
1	Rummeliibacillus	Megasphaera	0.576552
1	Rummeliibacillus	otu_4182	-0.54515
1	Rummeliibacillus	RFN20	-0.433187
1	Rummeliibacillus	Subdoligranulum	0.653211
1	Sarcina	Aerococcus	-0.475732
1	Sarcina	Blautia	-0.504001
1	Sarcina	Butyrivibrio	-0.560383
1	Sarcina	Catenibacterium	-0.58025
1	Sarcina	Clostridium_clade_2	-0.59251
1	Sarcina	Clostridium_clade_3	-0.721901
1	Sarcina	Dehalobacterium	-0.510652
1	Sarcina	Dialister	-0.508732
1	Sarcina	Dorea	-0.573629
1	Sarcina	Eubacterium_clade_1	-0.625351
1	Sarcina	Eubacterium_clade_3	-0.403238
1	Sarcina	Faecalibacterium	-0.767276
1	Sarcina	Fibrobacter	-0.459453
1	Sarcina	Flavobacterium	-0.548004
1	Sarcina	Helicobacter	0.406314
1	Sarcina	Incertae_sedis_family_Lachnospiraceae	-0.45526
1	Sarcina	Megasphaera	-0.581433
1	Sarcina	otu_2066	0.677506
1	Sarcina	otu_2201	-0.608401
1	Sarcina	otu_4182	0.518051
1	Sarcina	otu_4381	-0.466127
1	Sarcina	Pedobacter	-0.658676
1	Sarcina	Peptococcus	-0.612579
1	Sarcina	Pseudomonas	0.464523
1	Sarcina	RFN20	0.582715
1	Sarcina	Ruminococcus_clade_2	-0.594012
1	Sarcina	Rummeliibacillus	-0.7056
1	Sarcina	Sphaerochaeta	0.440062
1	Sarcina	Sphingobacterium	0.461115
1	Sarcina	Subdoligranulum	-0.752881
1	Sarcina	Weissella	0.431398
1	Sphaerochaeta	Campylobacter	0.449333
1	Sphaerochaeta	Clostridium_clade_3	-0.582853
1	Sphaerochaeta	Desulfovibrio	0.788946
1	Sphaerochaeta	Helicobacter	0.430113
1	Sphaerochaeta	otu_4182	0.519957
1	Sphaerochaeta	RFN20	0.659504
1	Sphingobacterium	Brachyspira	0.476158
1	Sphingobacterium	Clostridium_clade_3	-0.627125
1	Sphingobacterium	Desulfovibrio	0.488268
1	Sphingobacterium	Erysipelothrix	0.66055
1	Sphingobacterium	Helicobacter	0.505325
1	Sphingobacterium	otu_915	-0.436898
1	Sphingobacterium	Paludibacter	0.50499
1	Sphingobacterium	Psychrobacter	0.772952
1	Sphingobacterium	RFN20	0.653307
1	Sphingobacterium	Sphaerochaeta	0.498366
1	Sphingobacterium	Subdoligranulum	-0.552761
1	Sphingobacterium	Trichococcus	0.623097
1	stool_score_am	Acinetobacter	0.434362
1	stool_score_am	Brachyspira	0.685526
1	stool_score_am	Campylobacter	0.701534
1	stool_score_am	Collinsella	0.449641
1	stool_score_am	Comamonas	0.476856
1	stool_score_am	Coprococcus	-0.443353
1	stool_score_am	Desulfovibrio	0.61965
1	stool_score_am	Dysgonomonas	0.632715
1	stool_score_am	Enterococcus	0.407081
1	stool_score_am	Erysipelothrix	0.574317
1	stool_score_am	Flavobacterium	0.556661
1	stool_score_am	Helicobacter	0.671336
1	stool_score_am	Lachnospira	-0.481029
1	stool_score_am	Lactobacillus	-0.428721
1	stool_score_am	Lactococcus	0.497702
1	stool_score_am	Oscillospira	-0.421674
1	stool_score_am	otu_1033	0.448253
1	stool_score_am	otu_1998	-0.40268
1	stool_score_am	otu_2201	0.567621
1	stool_score_am	Paludibacter	0.672182
1	stool_score_am	Pedobacter	0.495372
1	stool_score_am	Psychrobacter	0.428092
1	stool_score_am	RFN20	0.480089
1	stool_score_am	Sphingobacterium	0.455335
1	stool_score_am	Treponema	0.673312
1	stool_score_am	Weissella	-0.542984
1	stool_score_am	Yersinia	0.532988
1	Streptococcus	Aerococcus	0.485257
1	Streptococcus	Brachyspira	-0.447472
1	Streptococcus	Bulleidia	0.457686
1	Streptococcus	Butyrivibrio	0.465907
1	Streptococcus	Catenibacterium	0.52452
1	Streptococcus	Clostridium_clade_2	0.436869
1	Streptococcus	Clostridium_clade_3	0.612417
1	Streptococcus	Dehalobacterium	0.456482
1	Streptococcus	Desulfovibrio	-0.404081
1	Streptococcus	Dialister	0.523496
1	Streptococcus	Dorea	0.457858
1	Streptococcus	Erysipelothrix	-0.539757
1	Streptococcus	Eubacterium_clade_1	0.460891
1	Streptococcus	Faecalibacterium	0.452155
1	Streptococcus	Fibrobacter	0.405745
1	Streptococcus	Helicobacter	-0.420226
1	Streptococcus	Incertae_sedis_family_Lachnospiraceae	0.408696
1	Streptococcus	Lactococcus	-0.472311
1	Streptococcus	Megasphaera	0.577273
1	Streptococcus	otu_2066	-0.424043
1	Streptococcus	otu_2087	0.575175
1	Streptococcus	otu_2159	0.503371
1	Streptococcus	Peptococcus	0.457273
1	Streptococcus	Pseudomonas	-0.518454
1	Streptococcus	Psychrobacter	-0.438168
1	Streptococcus	RFN20	-0.662674
1	Streptococcus	Ruminococcus_clade_1	0.669024
1	Streptococcus	Ruminococcus_clade_2	0.4285
1	Streptococcus	Rummeliibacillus	0.527437
1	Streptococcus	Sarcina	-0.48803
1	Streptococcus	Sphaerochaeta	-0.452652
1	Streptococcus	Sphingobacterium	-0.650717
1	Streptococcus	Subdoligranulum	0.492131
1	Subdoligranulum	Campylobacter	-0.553343
1	Subdoligranulum	Clostridium_clade_3	0.7174
1	Subdoligranulum	Dehalobacterium	0.623533
1	Subdoligranulum	Fibrobacter	0.430654
1	Subdoligranulum	otu_4182	-0.563261
1	Subdoligranulum	RFN20	-0.720664
1	Treponema	Acinetobacter	0.426697
1	Treponema	Adlercreutzia	0.582562
1	Treponema	Brachyspira	0.518616
1	Treponema	Campylobacter	0.704222
1	Treponema	Clostridium_clade_3	-0.405796
1	Treponema	Collinsella	0.572277
1	Treponema	Coprococcus	-0.436086
1	Treponema	Desulfovibrio	0.550026
1	Treponema	Dysgonomonas	0.544469
1	Treponema	Erysipelothrix	0.460851
1	Treponema	Eubacterium_clade_1	0.411347
1	Treponema	Fibrobacter	0.414872
1	Treponema	Flavobacterium	0.423818
1	Treponema	Helicobacter	0.721201
1	Treponema	Lachnospira	-0.480042
1	Treponema	Leuconostoc	0.462568
1	Treponema	Oscillospira	-0.512091
1	Treponema	otu_1033	0.547105
1	Treponema	otu_2201	0.534608
1	Treponema	otu_4182	0.533294
1	Treponema	p-75-a5	0.40601
1	Treponema	Paludibacter	0.758398
1	Treponema	Parabacteroides	0.583477
1	Treponema	Pedobacter	0.484359
1	Treponema	RFN20	0.49308
1	Treponema	Sphingobacterium	0.448935
1	Treponema	Weissella	-0.425236
1	Weissella	Acinetobacter	-0.563842
1	Weissella	Aerococcus	-0.555368
1	Weissella	Brachyspira	-0.498232
1	Weissella	Campylobacter	-0.407241
1	Weissella	Clostridium_clade_2	-0.677477
1	Weissella	Comamonas	-0.546187
1	Weissella	Dehalobacterium	-0.446453
1	Weissella	Desulfovibrio	-0.411068
1	Weissella	Dysgonomonas	-0.655451
1	Weissella	Erysipelothrix	-0.641467
1	Weissella	Eubacterium_clade_1	-0.495811
1	Weissella	Eubacterium_clade_3	-0.427779
1	Weissella	Faecalibacterium	-0.400637
1	Weissella	Flavobacterium	-0.760545
1	Weissella	Incertae_sedis_family_Lachnospiraceae	-0.499807
1	Weissella	Lactococcus	-0.479677
1	Weissella	otu_1033	-0.456062
1	Weissella	otu_2066	0.40886
1	Weissella	otu_2201	-0.657782
1	Weissella	otu_4182	0.403027
1	Weissella	otu_4381	-0.414922
1	Weissella	otu_915	0.45344
1	Weissella	Paludibacter	-0.514382
1	Weissella	Pedobacter	-0.69197
1	Weissella	Peptococcus	-0.530052
1	Weissella	Psychrobacter	-0.666142
1	Weissella	Ruminococcus_clade_2	-0.402311
1	Weissella	Rummeliibacillus	-0.488289
1	Weissella	Sphingobacterium	-0.596724
1	Weissella	Trichococcus	-0.581184
1	Weissella	Yersinia	-0.727616
1	Yersinia	Acinetobacter	0.547183
1	Yersinia	Aerococcus	0.659217
1	Yersinia	Brachyspira	0.52733
1	Yersinia	Campylobacter	0.441162
1	Yersinia	Clostridium_clade_2	0.546117
1	Yersinia	Dehalobacterium	0.588487
1	Yersinia	Desulfovibrio	0.488492
1	Yersinia	Dorea	0.447606
1	Yersinia	Dysgonomonas	0.620462
1	Yersinia	Erysipelothrix	0.473274
1	Yersinia	Eubacterium_clade_1	0.470735
1	Yersinia	Faecalibacterium	0.445227
1	Yersinia	Fibrobacter	0.428918
1	Yersinia	Lachnospira	-0.436528
1	Yersinia	Lactococcus	0.452184
1	Yersinia	otu_1033	0.468968
1	Yersinia	otu_2066	-0.452158
1	Yersinia	otu_2201	0.557105
1	Yersinia	Paludibacter	0.460112
1	Yersinia	Pedobacter	0.64916
1	Yersinia	Peptococcus	0.555646
1	Yersinia	Psychrobacter	0.515284
1	Yersinia	Ruminococcus_clade_2	0.499033
1	Yersinia	Rummeliibacillus	0.472969
1	Yersinia	Sphingobacterium	0.47499
1	Yersinia	Trichococcus	0.433297
2	Adlercreutzia	Paludibacter	-0.538966
2	Adlercreutzia	Catenibacterium	-0.531428
2	Adlercreutzia	otu_2066	0.52516
2	Adlercreutzia	Acinetobacter	0.5613
2	Adlercreutzia	Megasphaera	0.638426
2	Aerococcus	otu_2201	-0.633995
2	Aerococcus	Peptococcus	-0.468716
2	Aerococcus	otu_1033	-0.438985
2	Aerococcus	Megasphaera	-0.400233
2	Aerococcus	Roseburia	0.425197
2	Aerococcus	Rummeliibacillus	0.42785
2	Blautia	Catenibacterium	-0.671344
2	Blautia	Rummeliibacillus	-0.515319
2	Blautia	otu_4381	-0.417277
2	Blautia	otu_2066	0.418568
2	Blautia	Pseudomonas	0.42354
2	Blautia	Acinetobacter	0.490919
2	Blautia	Peptococcus	0.552146
2	Blautia	Adlercreutzia	0.625445
2	Blautia	Ruminococcus_clade_2	0.642476
2	Blautia	Megasphaera	0.657171
2	Blautia	Incertae_sedis_family_Lachnospiraceae	0.789726
2	Bulleidia	Paludibacter	-0.637898
2	Bulleidia	otu_1033	-0.543152
2	Bulleidia	Eubacterium_clade_1	-0.528887
2	Bulleidia	otu_1998	-0.51554
2	Bulleidia	Roseburia	-0.44741
2	Bulleidia	Adlercreutzia	0.40693
2	Bulleidia	Peptococcus	0.414639
2	Bulleidia	Coprococcus	0.457748
2	Bulleidia	Ruminococcus_clade_2	0.465051
2	Bulleidia	otu_4381	0.465335
2	Bulleidia	Pseudomonas	0.465491
2	Bulleidia	otu_2066	0.46784
2	Bulleidia	Lactococcus	0.497377
2	Bulleidia	Clostridium_clade_2	0.588821
2	Butyrivibrio	Paludibacter	-0.485878
2	Butyrivibrio	Acinetobacter	0.462799
2	Butyrivibrio	Rummeliibacillus	0.532592
2	Butyrivibrio	p-75-a5	0.644994
2	Butyrivibrio	otu_4381	0.684078
2	Catenibacterium	Acinetobacter	-0.568475
2	Catenibacterium	Megasphaera	-0.445917
2	Clostridium_clade_1	Parabacteroides	-0.625423
2	Clostridium_clade_1	p-75-a5	-0.530178
2	Clostridium_clade_1	otu_1033	-0.456475
2	Clostridium_clade_1	Butyrivibrio	-0.417212
2	Clostridium_clade_1	Comamonas	0.493498
2	Clostridium_clade_1	Pseudomonas	0.497099
2	Clostridium_clade_1	Oscillospira	0.498486
2	Clostridium_clade_1	Leuconostoc	0.553471
2	Comamonas	Parabacteroides	-0.67118
2	Comamonas	Paludibacter	-0.497464
2	Comamonas	otu_1033	-0.481346
2	Comamonas	Rummeliibacillus	0.415739
2	Comamonas	Eubacterium_clade_1	0.465491
2	Comamonas	Lactococcus	0.465491
2	Comamonas	Pseudomonas	0.607372
2	Coprococcus	Catenibacterium	-0.567264
2	Coprococcus	Rummeliibacillus	-0.452145
2	Coprococcus	Paludibacter	-0.437055
2	Coprococcus	Weissella	-0.415048
2	Coprococcus	otu_2201	0.433384
2	Coprococcus	Dialister	0.451305
2	Coprococcus	Pseudomonas	0.561957
2	Coprococcus	Acinetobacter	0.562828
2	Coprococcus	Incertae_sedis_family_Lachnospiraceae	0.580634
2	Coprococcus	Ruminococcus_clade_2	0.589612
2	Coprococcus	Megasphaera	0.600205
2	Coprococcus	Blautia	0.607566
2	Coprococcus	Clostridium_clade_2	0.610563
2	Coprococcus	Adlercreutzia	0.613185
2	Coprococcus	Peptococcus	0.614887
2	Dialister	Catenibacterium	-0.583998
2	Dialister	otu_2066	-0.409082
2	Dialister	Parabacteroides	0.418366
2	Dialister	Roseburia	0.443969
2	Dialister	Acinetobacter	0.517036
2	Enterococcus	Parabacteroides	-0.482989
2	Enterococcus	Rummeliibacillus	0.437586
2	Enterococcus	Sarcina	0.456137
2	Enterococcus	Weissella	0.48299
2	Enterococcus	Acinetobacter	0.534109
2	Enterococcus	Leuconostoc	0.558731
2	Enterococcus	Aerococcus	0.56575
2	Enterococcus	Lactococcus	0.647403
2	Eubacterium_clade_1	Clostridium_clade_2	-0.466415
2	Eubacterium_clade_1	otu_1033	0.404706
2	Eubacterium_clade_1	otu_2201	0.443753
2	Faecalibacterium	Adlercreutzia	-0.523879
2	Faecalibacterium	Catenibacterium	0.425197
2	Faecalibacterium	Roseburia	0.452899
2	Incertae_sedis_family_Erysipelotrichaceae	Catenibacterium	-0.528028
2	Incertae_sedis_family_Erysipelotrichaceae	Rummeliibacillus	-0.438033
2	Incertae_sedis_family_Erysipelotrichaceae	otu_1033	-0.425197
2	Incertae_sedis_family_Erysipelotrichaceae	Paludibacter	-0.401718
2	Incertae_sedis_family_Erysipelotrichaceae	Peptococcus	0.425197
2	Incertae_sedis_family_Erysipelotrichaceae	Ruminococcus_clade_2	0.444447
2	Incertae_sedis_family_Erysipelotrichaceae	Megasphaera	0.457748
2	Incertae_sedis_family_Erysipelotrichaceae	Incertae_sedis_family_Lachnospiraceae	0.511477
2	Incertae_sedis_family_Erysipelotrichaceae	Pseudomonas	0.533613
2	Incertae_sedis_family_Erysipelotrichaceae	Blautia	0.548967
2	Incertae_sedis_family_Erysipelotrichaceae	Adlercreutzia	0.575236
2	Incertae_sedis_family_Erysipelotrichaceae	Acinetobacter	0.587737
2	Incertae_sedis_family_Erysipelotrichaceae	Clostridium_clade_2	0.59351
2	Incertae_sedis_family_Erysipelotrichaceae	Dialister	0.625068
2	Incertae_sedis_family_Erysipelotrichaceae	Coprococcus	0.685327
2	Incertae_sedis_family_Lachnospiraceae	Catenibacterium	-0.633854
2	Incertae_sedis_family_Lachnospiraceae	Rummeliibacillus	-0.455267
2	Incertae_sedis_family_Lachnospiraceae	Pseudomonas	0.42354
2	Incertae_sedis_family_Lachnospiraceae	otu_2066	0.467852
2	Incertae_sedis_family_Lachnospiraceae	Acinetobacter	0.482089
2	Incertae_sedis_family_Lachnospiraceae	Peptococcus	0.533401
2	Incertae_sedis_family_Lachnospiraceae	Ruminococcus_clade_2	0.605705
2	Incertae_sedis_family_Lachnospiraceae	Adlercreutzia	0.64419
2	Incertae_sedis_family_Lachnospiraceae	Megasphaera	0.659542
2	Lactobacillus	Incertae_sedis_family_Erysipelotrichaceae	-0.69722
2	Lactobacillus	Pseudomonas	-0.670148
2	Lactobacillus	Coprococcus	-0.577823
2	Lactobacillus	Ruminococcus_clade_1	-0.573263
2	Lactobacillus	Acinetobacter	-0.532592
2	Lactobacillus	Clostridium_clade_2	-0.526893
2	Lactobacillus	Dialister	-0.52516
2	Lactobacillus	Prevotella	-0.503505
2	Lactobacillus	Adlercreutzia	-0.464662
2	Lactobacillus	Oscillospira	-0.450942
2	Lactobacillus	Blautia	-0.448951
2	Lactobacillus	Comamonas	-0.442451
2	Lactobacillus	Incertae_sedis_family_Lachnospiraceae	-0.41146
2	Lactobacillus	Catenibacterium	0.404732
2	Lactobacillus	otu_1033	0.425197
2	Lactobacillus	Treponema	0.43363
2	Lactococcus	Parabacteroides	-0.580634
2	Lactococcus	Roseburia	-0.407613
2	Lactococcus	Rummeliibacillus	0.400108
2	Lactococcus	Acinetobacter	0.400359
2	Leuconostoc	Parabacteroides	-0.735181
2	Leuconostoc	otu_1033	-0.602567
2	Leuconostoc	otu_2201	-0.48019
2	Leuconostoc	Paludibacter	-0.424782
2	Leuconostoc	Rummeliibacillus	0.439239
2	Leuconostoc	Pseudomonas	0.475477
2	Leuconostoc	Weissella	0.479283
2	Leuconostoc	Aerococcus	0.496184
2	Leuconostoc	Lactococcus	0.633663
2	Leuconostoc	Comamonas	0.693586
2	LPS_IgA_fold	Aerococcus	0.500754
2	LPS_IgA_fold	Butyrivibrio	-0.532235
2	LPS_IgA_fold	Clostridium_clade_1	0.468779
2	LPS_IgA_fold	LPS_IgG_fold	0.730472
2	LPS_IgA_fold	Oscillospira	0.429295
2	LPS_IgA_fold	otu_1998	0.404677
2	LPS_IgA_fold	otu_2159	0.423903
2	LPS_IgA_fold	otu_2201	-0.495036
2	LPS_IgA_fold	otu_4381	-0.547295
2	LPS_IgA_fold	Streptococcus	-0.697608
2	LPS_IgA_fold	Weissella	0.505981
2	LPS_IgG_fold	Aerococcus	0.402464
2	LPS_IgG_fold	Eubacterium_clade_1	-0.416503
2	LPS_IgG_fold	otu_2159	0.508585
2	LPS_IgG_fold	otu_2201	-0.563142
2	LPS_IgG_fold	Streptococcus	-0.445389
2	LPS_IgG_fold	Weissella	0.446894
2	Megasphaera	Paludibacter	-0.447147
2	Megasphaera	Acinetobacter	0.418919
2	Oscillospira	Rummeliibacillus	-0.639085
2	Oscillospira	Butyrivibrio	-0.630134
2	Oscillospira	otu_4381	-0.508734
2	Oscillospira	p-75-a5	-0.507041
2	Oscillospira	Catenibacterium	-0.433933
2	Oscillospira	Coprococcus	0.412078
2	Oscillospira	Incertae_sedis_family_Erysipelotrichaceae	0.439948
2	Oscillospira	Megasphaera	0.456272
2	Oscillospira	Pseudomonas	0.470706
2	Oscillospira	Ruminococcus_clade_2	0.532808
2	Oscillospira	Incertae_sedis_family_Lachnospiraceae	0.607149
2	Oscillospira	Blautia	0.624841
2	otu_1998	Clostridium_clade_2	-0.691575
2	otu_1998	p-75-a5	-0.584909
2	otu_1998	otu_4381	-0.532808
2	otu_1998	Butyrivibrio	-0.440031
2	otu_1998	Paludibacter	0.426553
2	otu_1998	Eubacterium_clade_1	0.440284
2	otu_2066	Paludibacter	-0.562243
2	otu_2066	otu_1033	-0.500673
2	otu_2066	Roseburia	-0.457908
2	otu_2066	Megasphaera	0.554543
2	otu_2087	Rummeliibacillus	-0.68756
2	otu_2087	otu_4381	-0.603283
2	otu_2087	Butyrivibrio	-0.588998
2	otu_2087	Catenibacterium	-0.543519
2	otu_2087	Leuconostoc	-0.46946
2	otu_2087	Comamonas	-0.466411
2	otu_2087	p-75-a5	-0.452531
2	otu_2087	Weissella	-0.414898
2	otu_2087	Megasphaera	0.447816
2	otu_2087	Dialister	0.449984
2	otu_2087	Incertae_sedis_family_Lachnospiraceae	0.499325
2	otu_2087	otu_1033	0.503039
2	otu_2087	Ruminococcus_clade_2	0.535517
2	otu_2087	Blautia	0.547374
2	otu_2087	Oscillospira	0.578888
2	otu_2159	otu_2201	-0.610563
2	otu_2159	Peptococcus	-0.529604
2	otu_2159	Eubacterium_clade_1	-0.507789
2	otu_2159	Lactococcus	0.42562
2	otu_2159	Enterococcus	0.499602
2	otu_2159	Weissella	0.562234
2	otu_2159	Aerococcus	0.665756
2	otu_2201	otu_1033	0.609302
2	otu_4381	Paludibacter	-0.517894
2	otu_4381	Incertae_sedis_family_Lachnospiraceae	-0.426081
2	otu_4381	Eubacterium_clade_1	-0.414647
2	otu_4381	Catenibacterium	0.448434
2	otu_4381	Rummeliibacillus	0.470591
2	p-75-a5	Eubacterium_clade_1	-0.412912
2	p-75-a5	Clostridium_clade_2	0.420668
2	p-75-a5	otu_4381	0.570892
2	Paludibacter	Clostridium_clade_2	-0.489838
2	Paludibacter	otu_1033	0.583704
2	Parabacteroides	Rummeliibacillus	-0.420072
2	Parabacteroides	otu_1033	0.50386
2	Peptococcus	Paludibacter	-0.587793
2	Peptococcus	Rummeliibacillus	-0.401784
2	Peptococcus	Pseudomonas	0.49802
2	Peptococcus	Clostridium_clade_2	0.503
2	Peptococcus	otu_2066	0.514494
2	Peptococcus	Adlercreutzia	0.61968
2	Peptococcus	Megasphaera	0.666183
2	Prevotella	otu_2159	-0.501734
2	Prevotella	otu_1998	-0.479918
2	Prevotella	Weissella	-0.462706
2	Prevotella	Aerococcus	-0.454367
2	Prevotella	Enterococcus	-0.430206
2	Prevotella	Lactococcus	-0.425671
2	Prevotella	Leuconostoc	-0.402132
2	Prevotella	Acinetobacter	0.404887
2	Prevotella	Pseudomonas	0.406758
2	Prevotella	Dialister	0.446314
2	Prevotella	Coprococcus	0.451668
2	Prevotella	Clostridium_clade_2	0.496336
2	Prevotella	otu_2201	0.501886
2	Prevotella	Incertae_sedis_family_Erysipelotrichaceae	0.566802
2	Prevotella	Roseburia	0.591218
2	Pseudomonas	Parabacteroides	-0.489084
2	Pseudomonas	Paludibacter	-0.434692
2	Pseudomonas	Megasphaera	0.42354
2	Pseudomonas	Adlercreutzia	0.465491
2	Pseudomonas	Clostridium_clade_2	0.534033
2	Ruminococcus_clade_1	Catenibacterium	-0.530321
2	Ruminococcus_clade_1	p-75-a5	-0.470051
2	Ruminococcus_clade_1	otu_4381	-0.41587
2	Ruminococcus_clade_1	Sarcina	0.408862
2	Ruminococcus_clade_1	Blautia	0.415683
2	Ruminococcus_clade_1	otu_2201	0.421772
2	Ruminococcus_clade_1	Pseudomonas	0.431271
2	Ruminococcus_clade_1	Oscillospira	0.432559
2	Ruminococcus_clade_1	Roseburia	0.448287
2	Ruminococcus_clade_1	Incertae_sedis_family_Erysipelotrichaceae	0.461432
2	Ruminococcus_clade_1	Coprococcus	0.462909
2	Ruminococcus_clade_1	Dialister	0.547222
2	Ruminococcus_clade_2	Rummeliibacillus	-0.620528
2	Ruminococcus_clade_2	Roseburia	-0.45749
2	Ruminococcus_clade_2	Aerococcus	-0.436705
2	Ruminococcus_clade_2	Catenibacterium	-0.435366
2	Ruminococcus_clade_2	Pseudomonas	0.42354
2	Ruminococcus_clade_2	Clostridium_clade_2	0.473908
2	Ruminococcus_clade_2	Adlercreutzia	0.482989
2	Ruminococcus_clade_2	otu_2066	0.502887
2	Ruminococcus_clade_2	Peptococcus	0.607718
2	Ruminococcus_clade_2	Megasphaera	0.724127
2	Rummeliibacillus	Megasphaera	-0.489277
2	Rummeliibacillus	Clostridium_clade_2	-0.425245
2	Sarcina	otu_2066	-0.634479
2	Sarcina	Parabacteroides	-0.522842
2	Sarcina	Clostridium_clade_2	-0.500081
2	Sarcina	Peptococcus	-0.499761
2	Sarcina	Ruminococcus_clade_2	-0.466415
2	Sarcina	Comamonas	0.42354
2	Sarcina	Paludibacter	0.425172
2	Sarcina	Aerococcus	0.439879
2	Sarcina	Eubacterium_clade_1	0.455192
2	Sarcina	otu_1998	0.468254
2	Sarcina	Leuconostoc	0.522842
2	Sarcina	Lactococcus	0.522842
2	Sarcina	Rummeliibacillus	0.534312
2	Streptococcus	Oscillospira	-0.563378
2	Streptococcus	otu_1998	-0.501683
2	Streptococcus	Clostridium_clade_1	-0.494822
2	Streptococcus	Incertae_sedis_family_Lachnospiraceae	-0.460753
2	Streptococcus	Weissella	-0.430773
2	Streptococcus	otu_2087	-0.426013
2	Streptococcus	Blautia	-0.409715
2	Streptococcus	Clostridium_clade_2	0.400081
2	Streptococcus	otu_2201	0.438183
2	Streptococcus	p-75-a5	0.507443
2	Streptococcus	otu_4381	0.662297
2	Streptococcus	Butyrivibrio	0.662449
2	Treponema	Adlercreutzia	-0.734685
2	Treponema	Megasphaera	-0.58237
2	Treponema	otu_2066	-0.570891
2	Treponema	Peptococcus	-0.558183
2	Treponema	Incertae_sedis_family_Lachnospiraceae	-0.557721
2	Treponema	Bulleidia	-0.539615
2	Treponema	Coprococcus	-0.534285
2	Treponema	Blautia	-0.5278
2	Treponema	Incertae_sedis_family_Erysipelotrichaceae	-0.517488
2	Treponema	Acinetobacter	-0.500887
2	Treponema	Comamonas	-0.442451
2	Treponema	Pseudomonas	-0.434692
2	Treponema	Ruminococcus_clade_2	-0.421815
2	Treponema	Catenibacterium	0.430358
2	Treponema	otu_1033	0.481279
2	Treponema	Faecalibacterium	0.548916
2	Treponema	Paludibacter	0.679979
2	Weissella	otu_2201	-0.733809
2	Weissella	otu_1033	-0.528891
2	Weissella	Rummeliibacillus	0.480887
2	Weissella	Aerococcus	0.71724
